# Supplementary material for: Human Spermatogenic Failure Purges Deleterious Mutation Load from the Autosomes and Both Sex Chromosomes, including the Gene DMRT1
Source: PLOS journal article supplement (doi:10.1371/journal.pgen.1003349), 2013-03-21

4225320261\_B, nprobe = 39

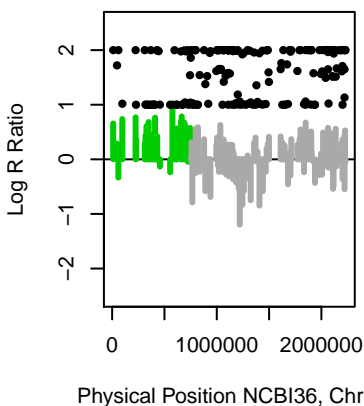

4225320261\_B, nprobe = 23

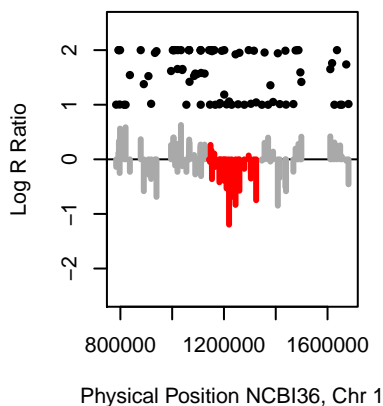

4225320261\_B, nprobe = 35

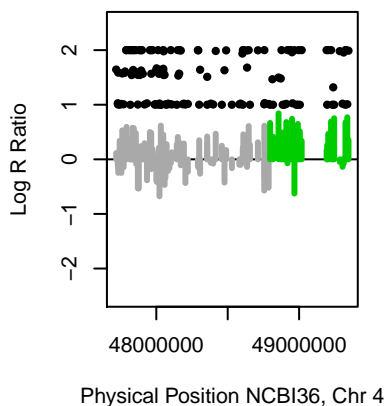

4225320261\_B, nprobe = 34

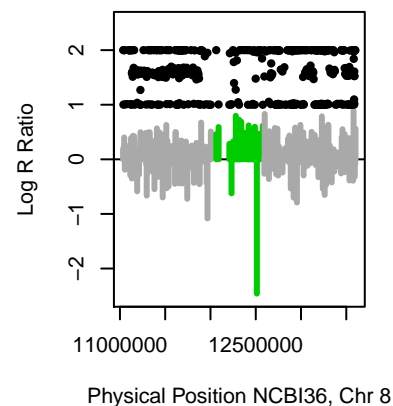

4225320261\_B, nprobe = 25

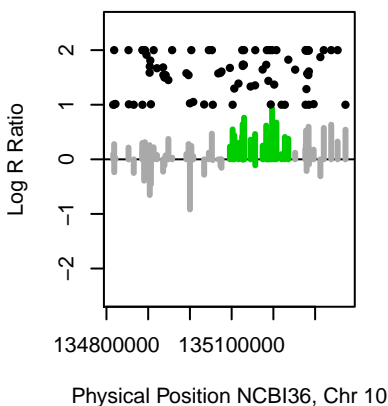

4225320261\_B, nprobe = 23

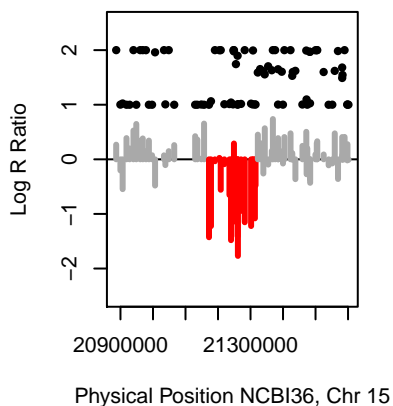

4225320261\_B, nprobe = 31

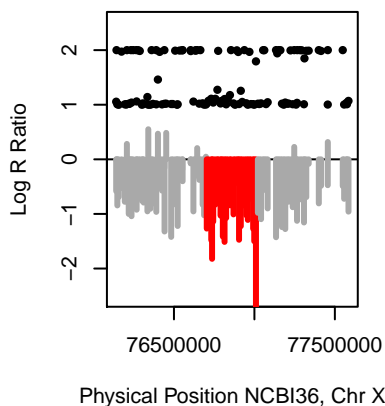

4225320162\_B, nprobe = 87

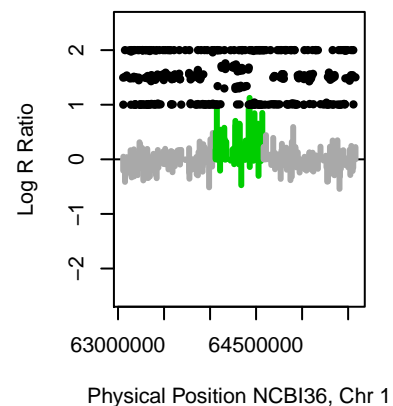

4225320162\_B, nprobe = 11

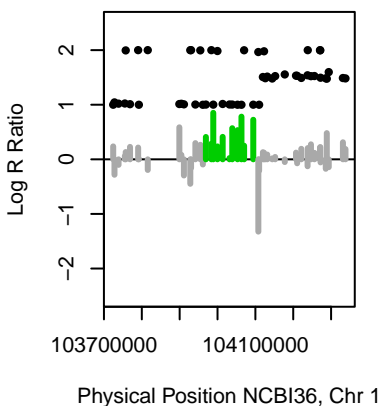

4225320162\_B, nprobe = 33

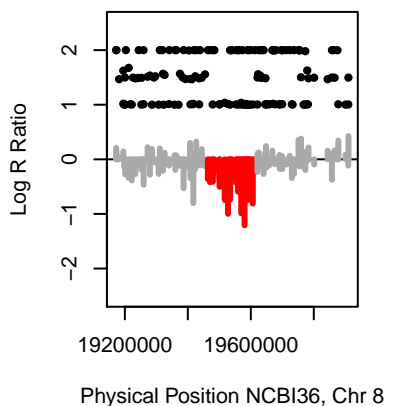

4225320162\_B, nprobe = 29

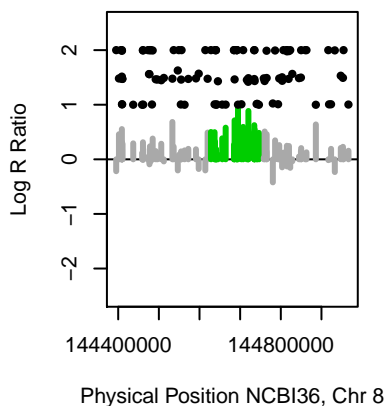

4225320220\_B, nprobe = 17

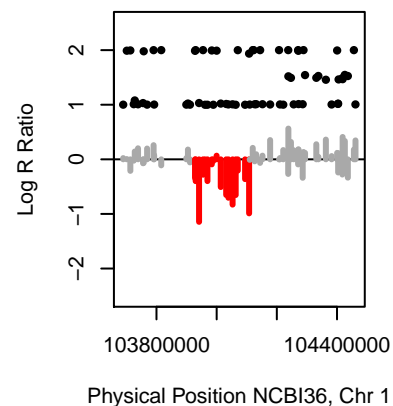

4225320220\_B, nprobe = 13

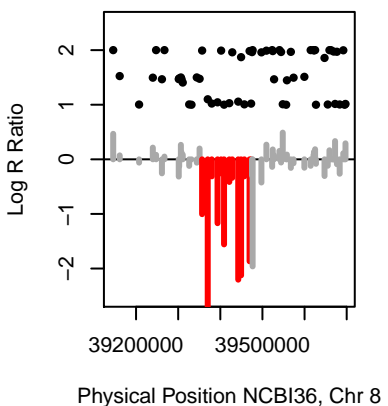

4225320220\_B, nprobe = 9

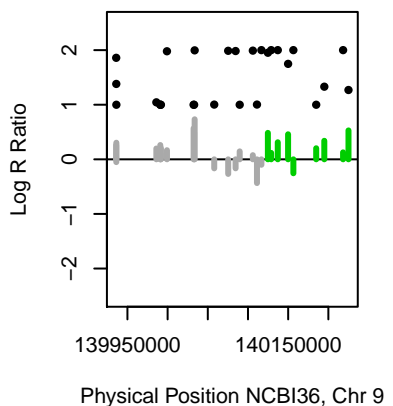

4225320220\_B, nprobe = 13

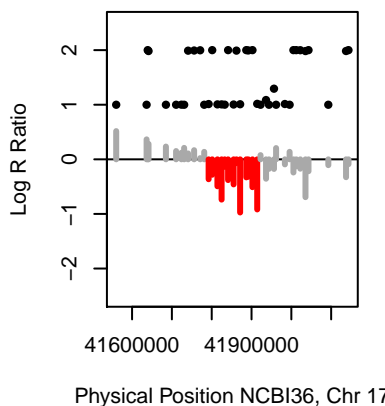

4225320220\_B, nprobe = 10

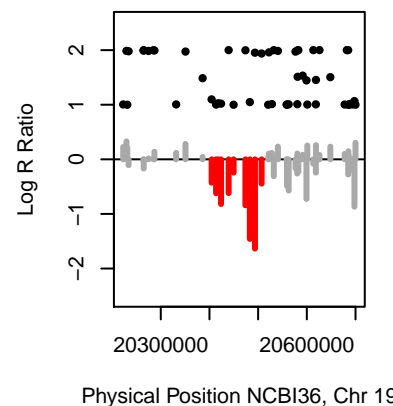

4225320220\_B, nprobe = 31

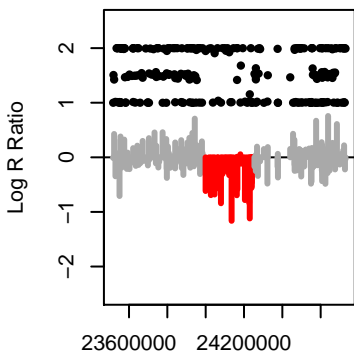

Physical Position NCBI36, Chr 22

4225320102\_B, nprobe = 15

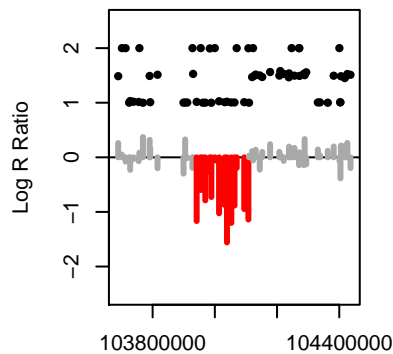

Physical Position NCBI36, Chr 1

4225320102\_B, nprobe = 16

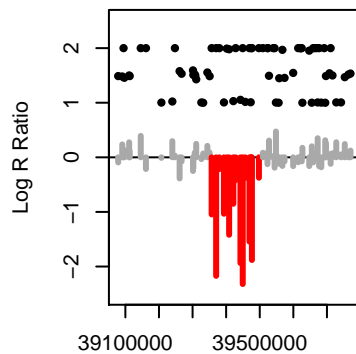

Physical Position NCBI36, Chr 8

4225320102\_B, nprobe = 29

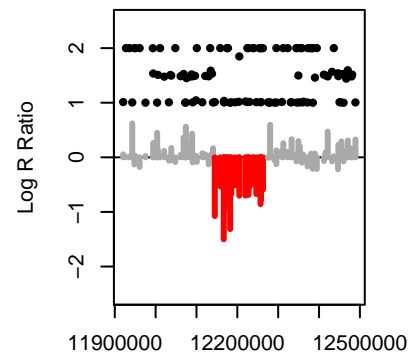

Physical Position NCBI36, Chr 9

4225320102\_B, nprobe = 14

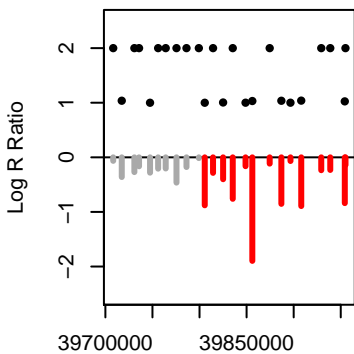

Physical Position NCBI36, Chr 9

4225320831\_A, nprobe = 10

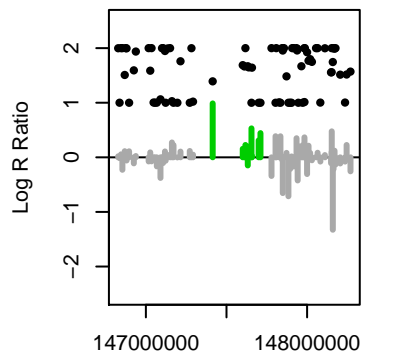

Physical Position NCBI36, Chr 1

4225320831\_A, nprobe = 15

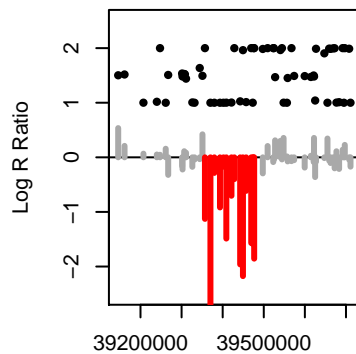

Physical Position NCBI36, Chr 8

4225320831\_A, nprobe = 35

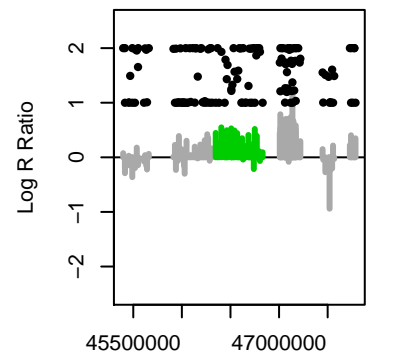

Physical Position NCBI36, Chr 10

4225320831\_A, nprobe = 43

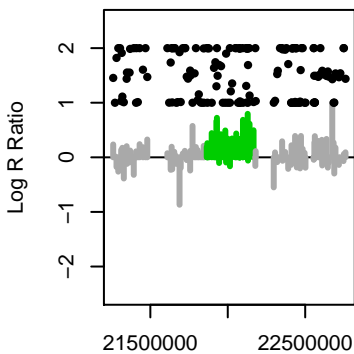

Physical Position NCBI36, Chr 17

4225320831\_A, nprobe = 16

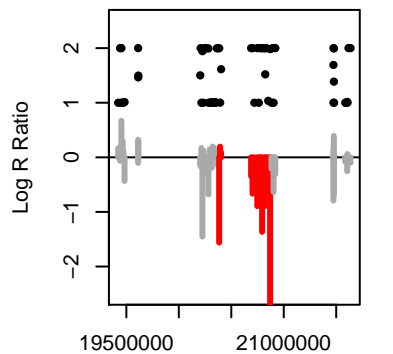

Physical Position NCBI36, Chr Y

4225320294\_B, nprobe = 17

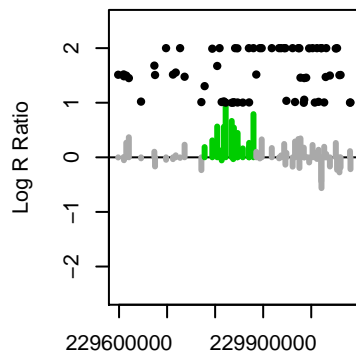

Physical Position NCBI36, Chr 1

4225320294\_B, nprobe = 21

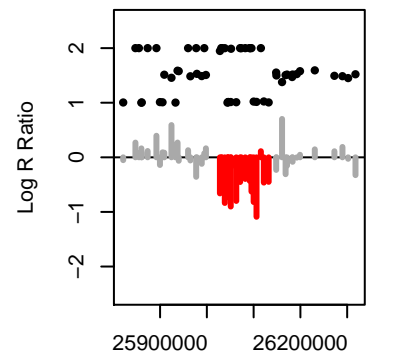

Physical Position NCBI36, Chr 3

4225320294\_B, nprobe = 16

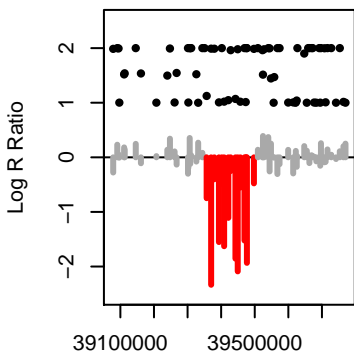

Physical Position NCBI36, Chr 8

4225320294\_B, nprobe = 14

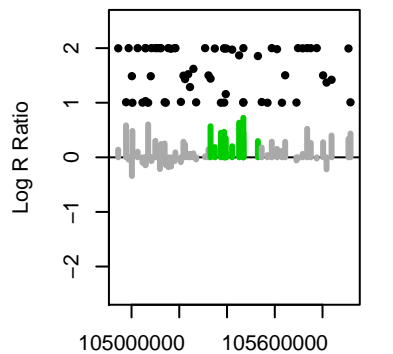

Physical Position NCBI36, Chr 14

4225320294\_B, nprobe = 35

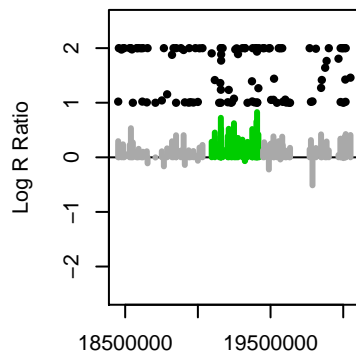

Physical Position NCBI36, Chr 15

4225320294\_B, nprobe = 15

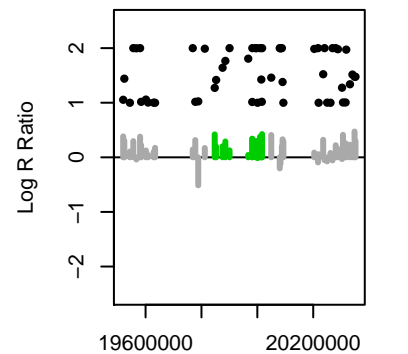

Physical Position NCBI36, Chr 15

4225320294\_B, nprobe = 21

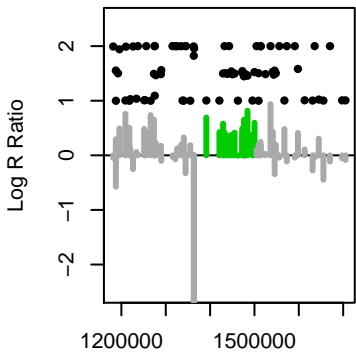

Physical Position NCBI36, Chr 16

4225320294\_B, nprobe = 14

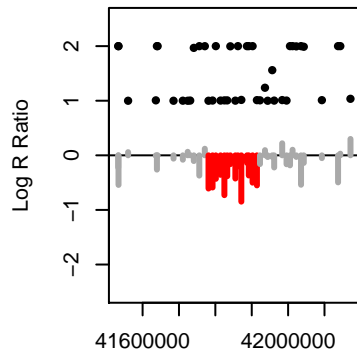

Physical Position NCBI36, Chr 17

4225320294\_B, nprobe = 24

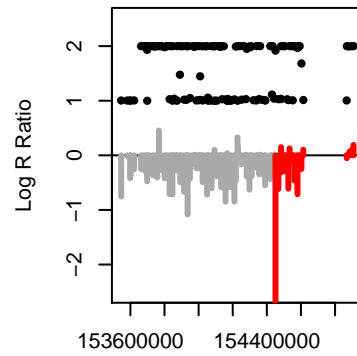

Physical Position NCBI36, Chr X

4225320341\_A, nprobe = 54

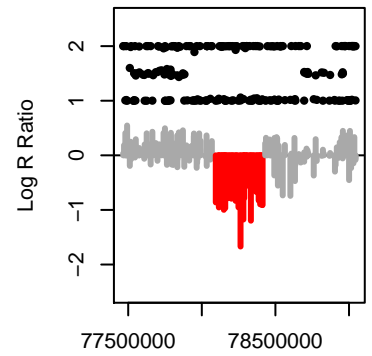

Physical Position NCBI36, Chr 2

4225320341\_A, nprobe = 50

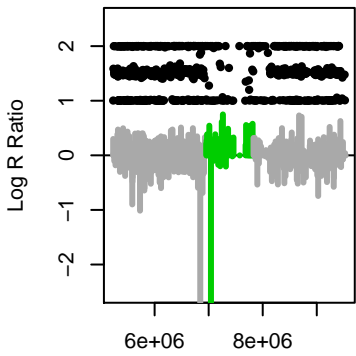

Physical Position NCBI36, Chr 8

4225320341\_A, nprobe = 16

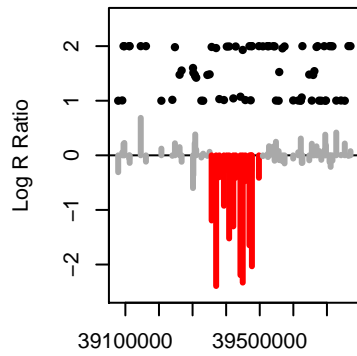

Physical Position NCBI36, Chr 8

4225320341\_A, nprobe = 17

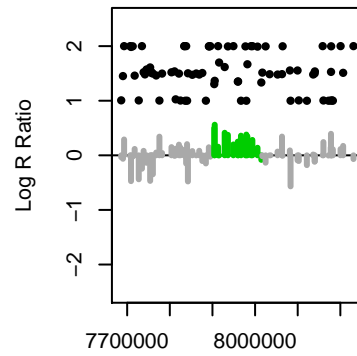

Physical Position NCBI36, Chr 12

4225320341\_A, nprobe = 26

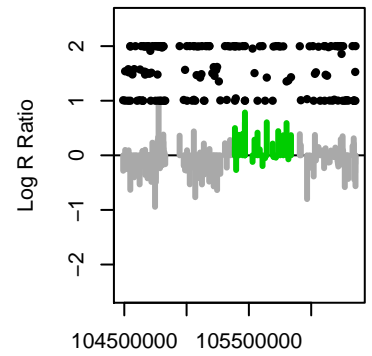

Physical Position NCBI36, Chr 14

4225320341\_A, nprobe = 15

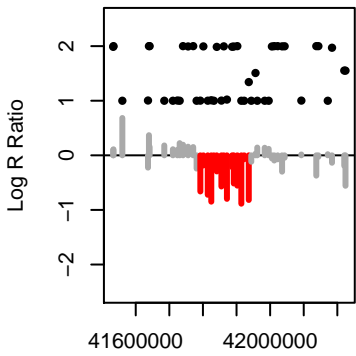

Physical Position NCBI36, Chr 17

4225320875\_A, nprobe = 20

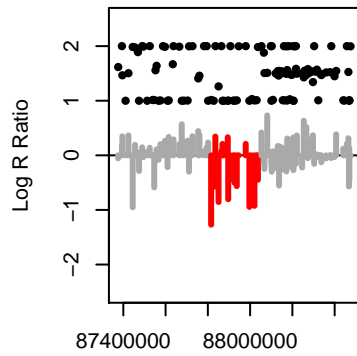

Physical Position NCBI36, Chr 2

4225320875\_A, nprobe = 15

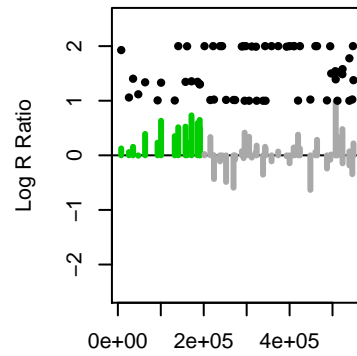

Physical Position NCBI36, Chr 4

4225320875\_A, nprobe = 13

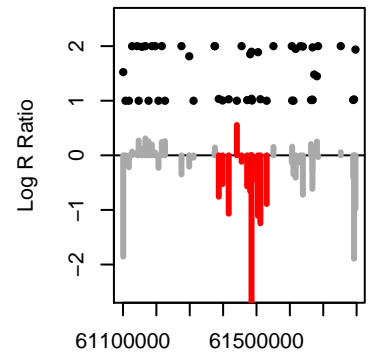

Physical Position NCBI36, Chr 7

4225320875\_A, nprobe = 29

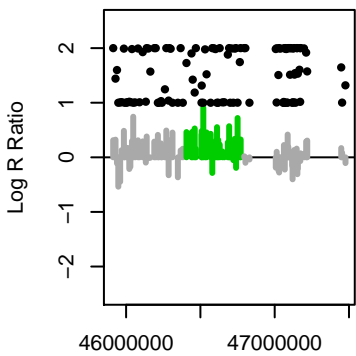

Physical Position NCBI36, Chr 10

4225320875\_A, nprobe = 20

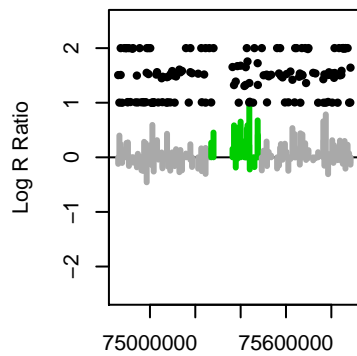

Physical Position NCBI36, Chr 14

4225320875\_A, nprobe = 16

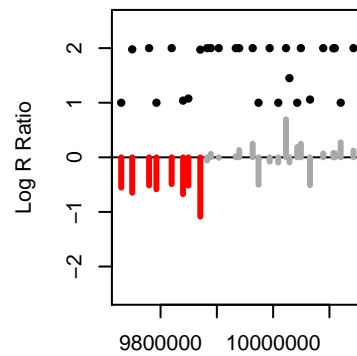

Physical Position NCBI36, Chr 21

4225320734\_A, nprobe = 148

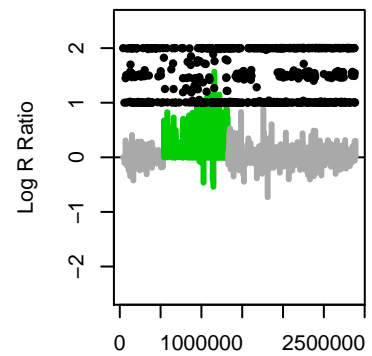

Physical Position NCBI36, Chr 3

4225320734\_A, nprobe = 62

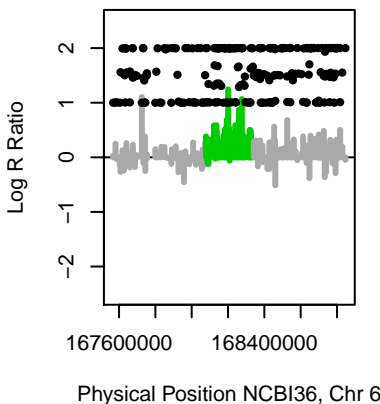

4225320734\_A, nprobe = 27

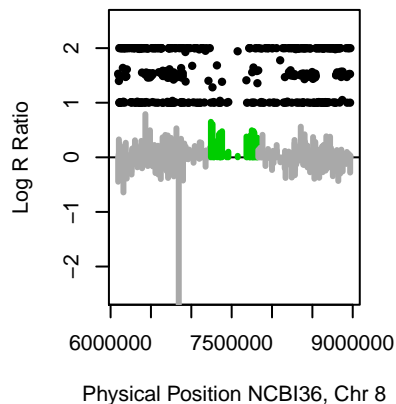

4225320734\_A, nprobe = 14

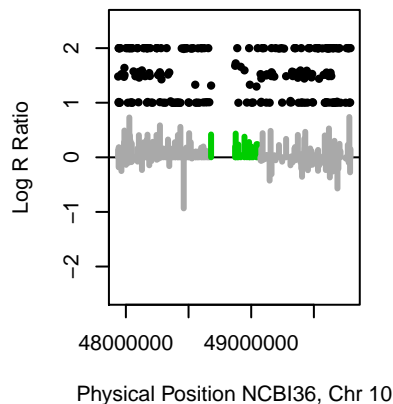

4225320734\_A, nprobe = 48

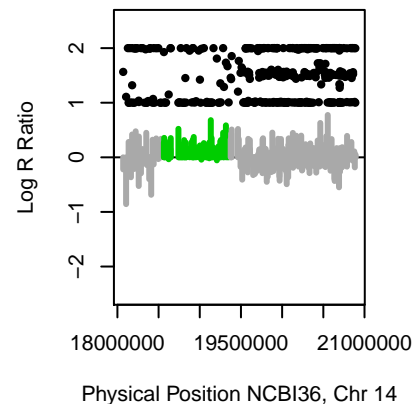

4225320734\_A, nprobe = 39

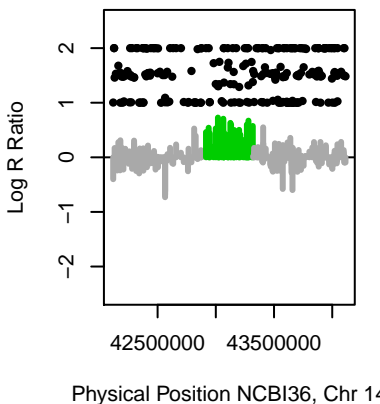

4225320734\_A, nprobe = 24

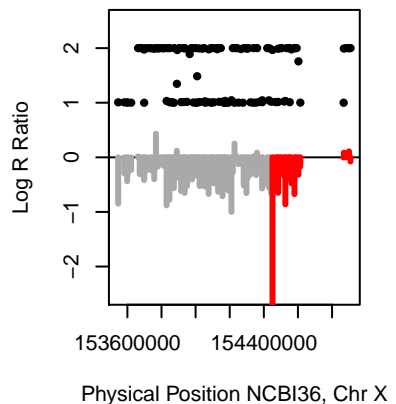

4225320287\_B, nprobe = 36

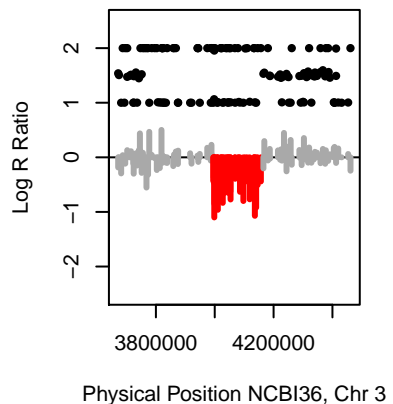

4225320287\_B, nprobe = 16

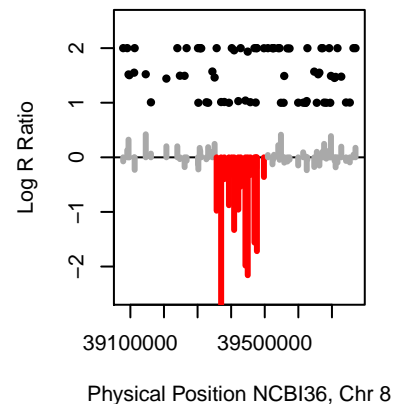

4225320287\_B, nprobe = 49

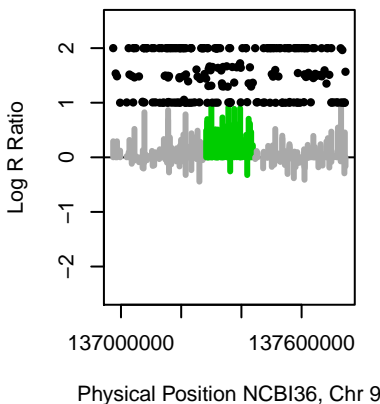

4225320287\_B, nprobe = 20

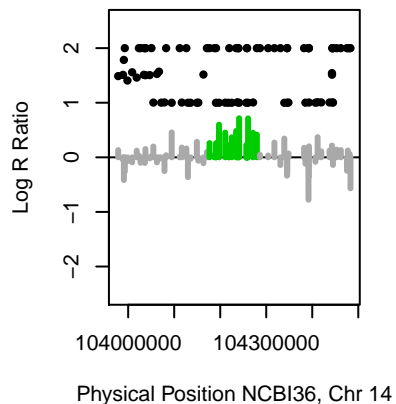

4225320287\_B, nprobe = 24

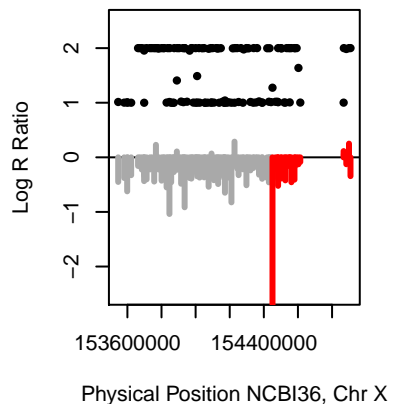

4225320278\_A, nprobe = 10

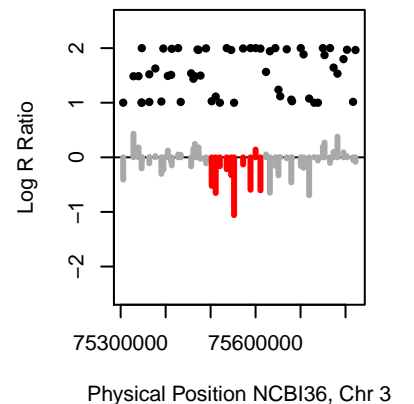

4225320278\_A, nprobe = 112

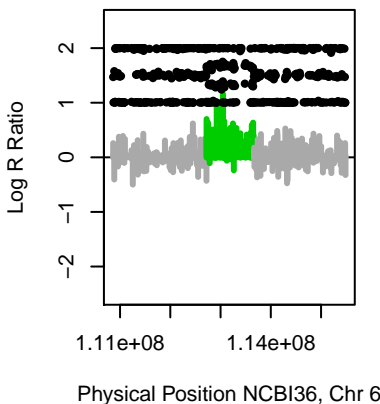

4225320278\_A, nprobe = 53

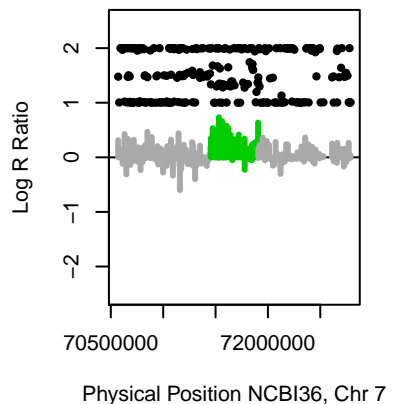

4225320278\_A, nprobe = 10

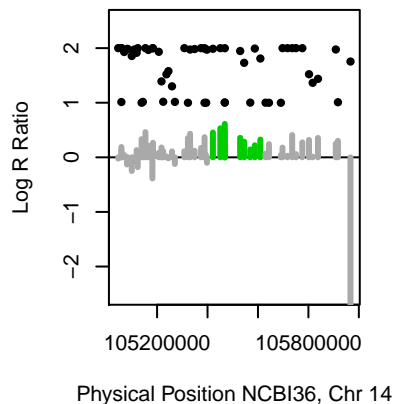

4225320278\_A, nprobe = 7

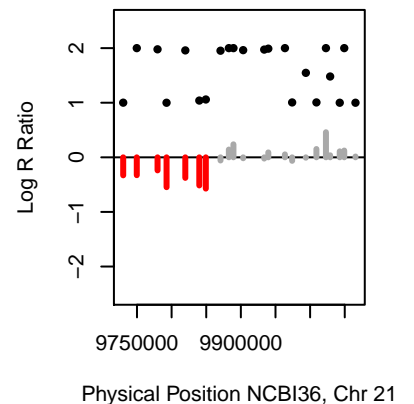

4225320162\_A, nprobe = 18

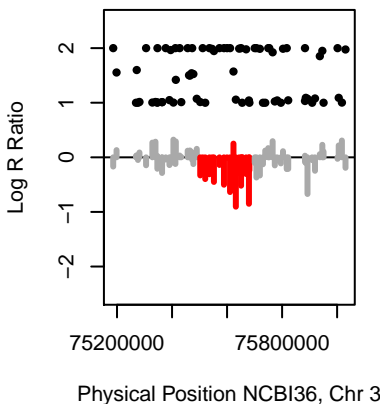

4225320162\_A, nprobe = 32

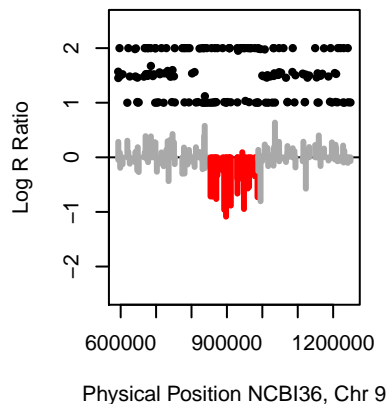

4225320162\_A, nprobe = 55

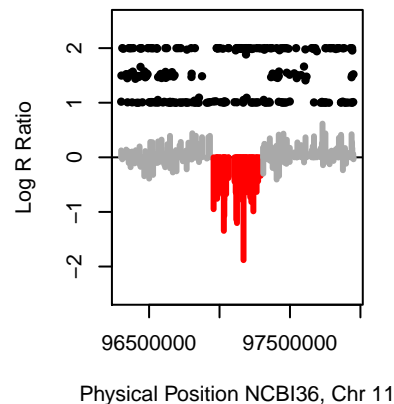

4225320162\_A, nprobe = 20

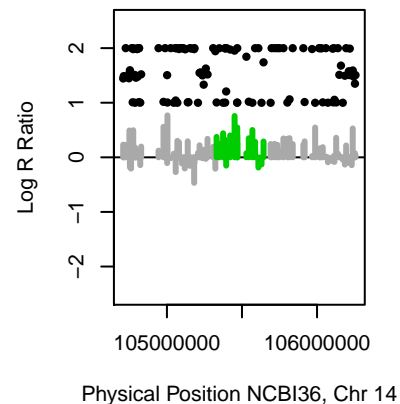

4225320162\_A, nprobe = 24

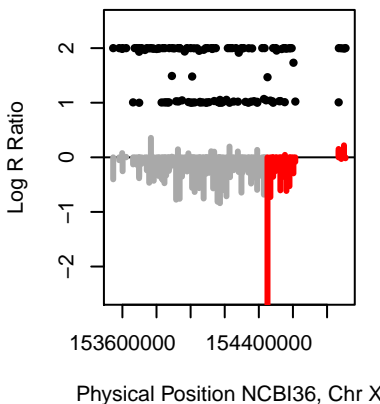

4225320735\_B, nprobe = 21

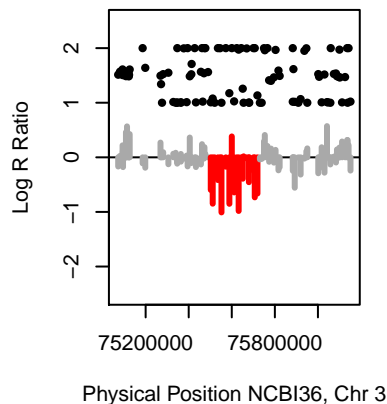

4225320735\_B, nprobe = 79

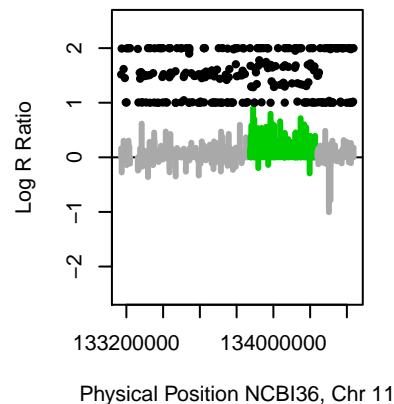

4225320735\_B, nprobe = 35

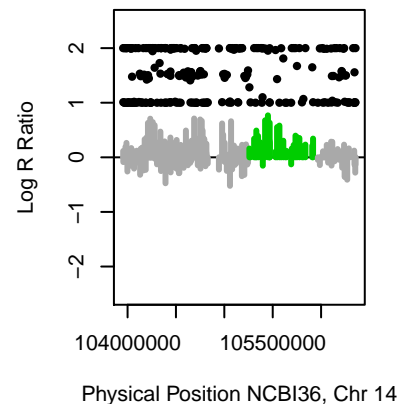

4225320735\_B, nprobe = 16

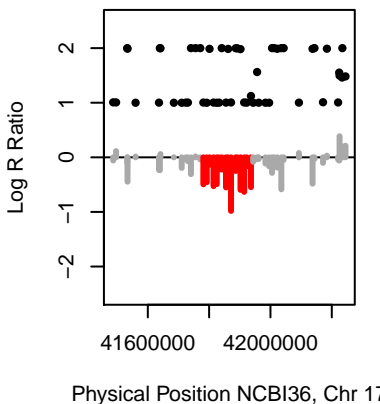

4225320735\_B, nprobe = 31

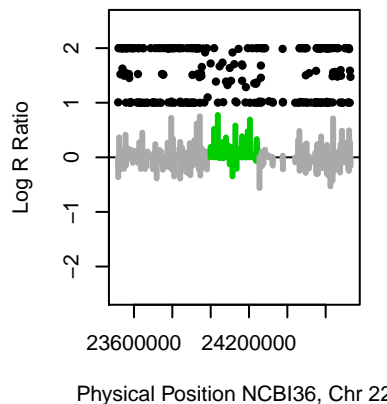

4225320735\_B, nprobe = 10

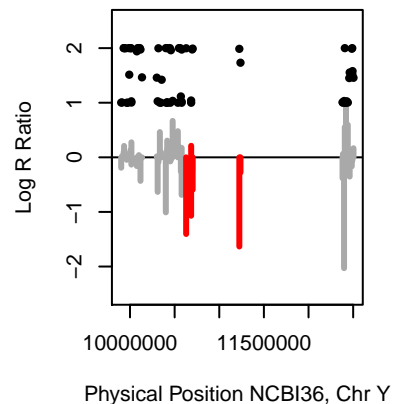

4225320735\_B, nprobe = 10

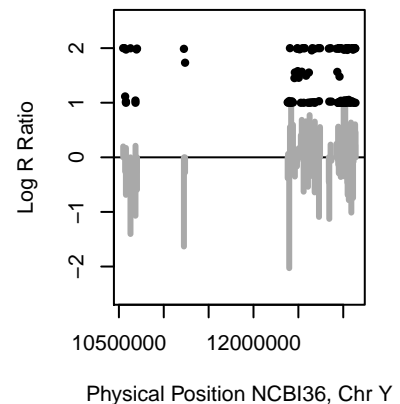

4225320735\_B, nprobe = 24

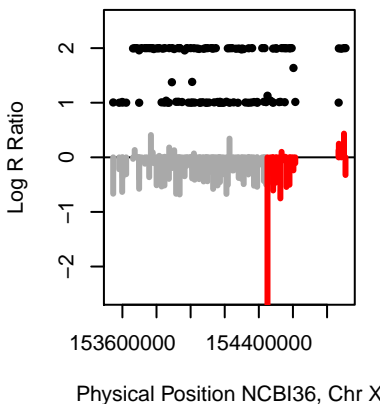

4225320318\_A, nprobe = 20

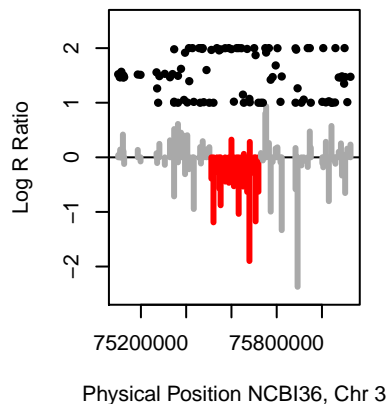

4225320318\_A, nprobe = 13

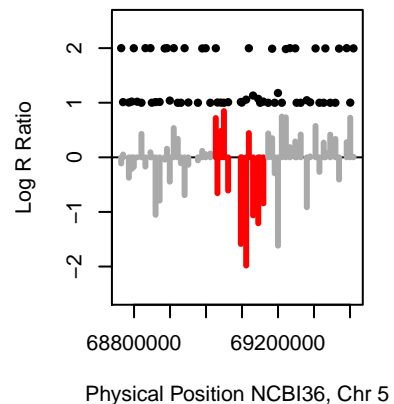

4225320318\_A, nprobe = 19

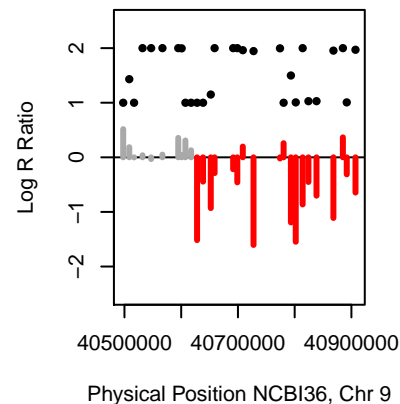

4225320318\_A, nprobe = 17

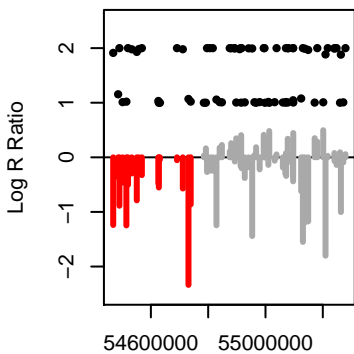

Physical Position NCBI36, Chr 11

4225320318\_A, nprobe = 24

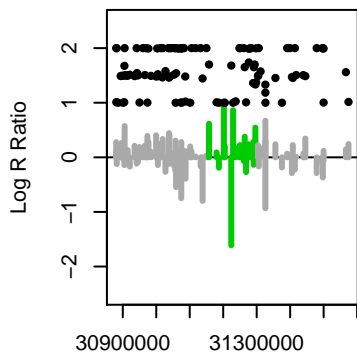

Physical Position NCBI36, Chr 12

4225320318\_A, nprobe = 47

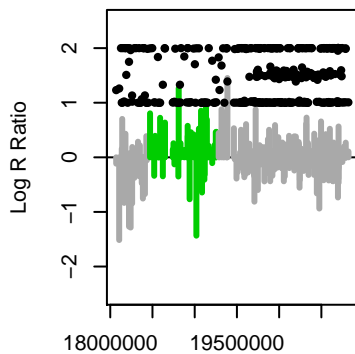

Physical Position NCBI36, Chr 14

4225320318\_A, nprobe = 26

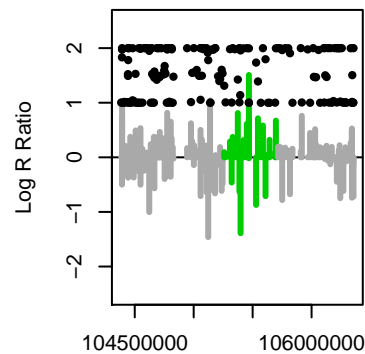

Physical Position NCBI36, Chr 14

4225320318\_A, nprobe = 9

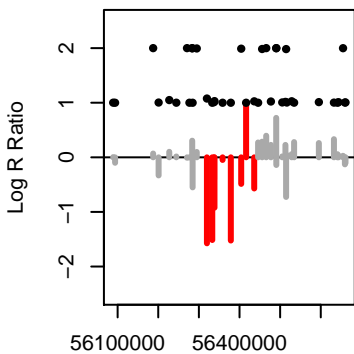

Physical Position NCBI36, Chr 17

4225320318\_A, nprobe = 18

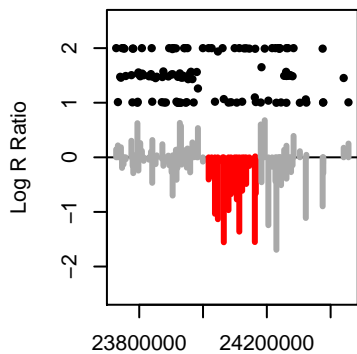

Physical Position NCBI36, Chr 22

4225320193\_A, nprobe = 19

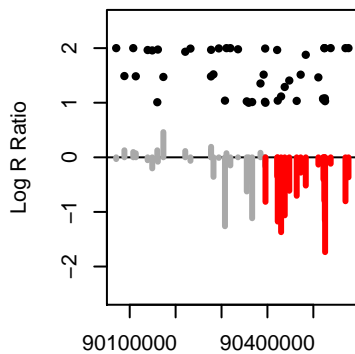

Physical Position NCBI36, Chr 3

4225320193\_A, nprobe = 16

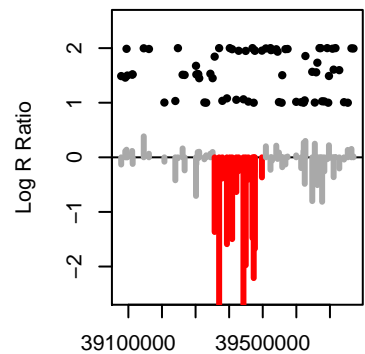

Physical Position NCBI36, Chr 8

4225320193\_A, nprobe = 18

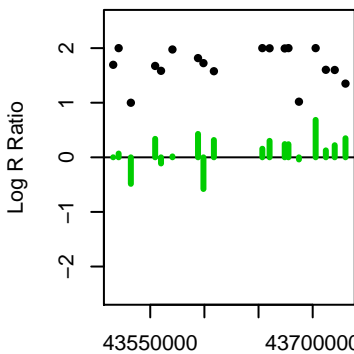

Physical Position NCBI36, Chr 9

4225320193\_A, nprobe = 4

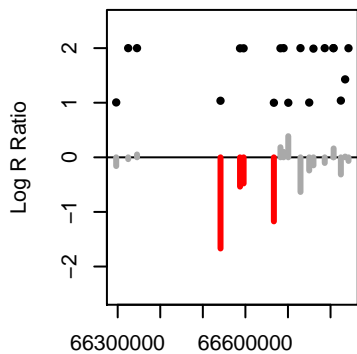

Physical Position NCBI36, Chr 9

4225320193\_A, nprobe = 39

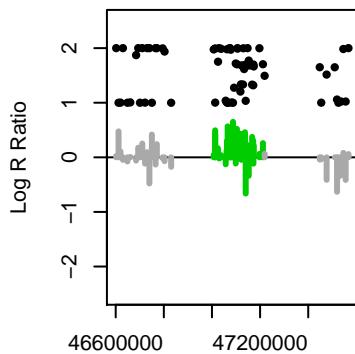

Physical Position NCBI36, Chr 10

4225320193\_A, nprobe = 10

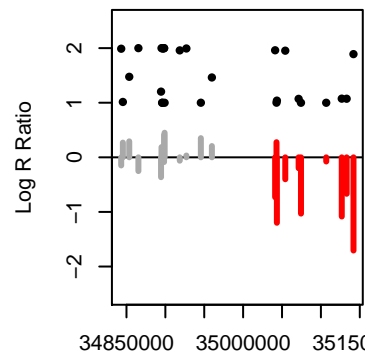

Physical Position NCBI36, Chr 16

4225320193\_A, nprobe = 51

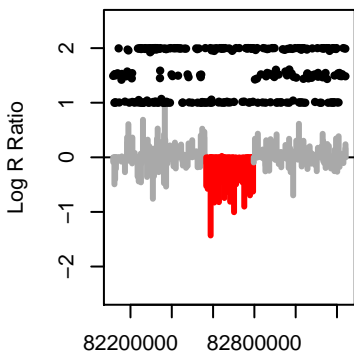

Physical Position NCBI36, Chr 16

4225320193\_A, nprobe = 16

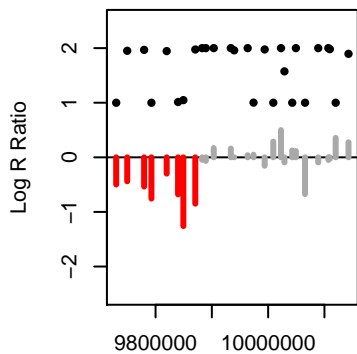

Physical Position NCBI36, Chr 21

4225320193\_A, nprobe = 18

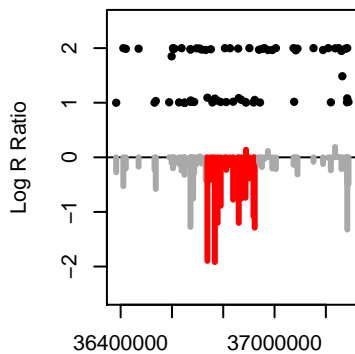

Physical Position NCBI36, Chr X

4225320193\_A, nprobe = 24

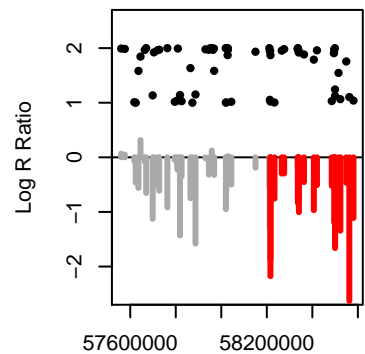

Physical Position NCBI36, Chr X

4225320193\_A, nprobe = 38

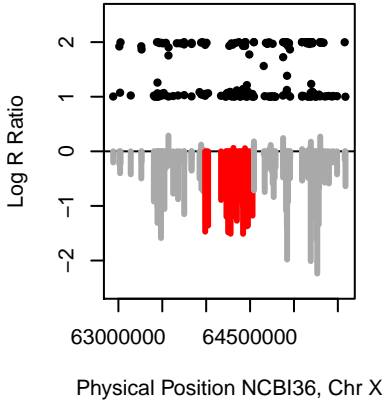

4225320193\_A, nprobe = 18

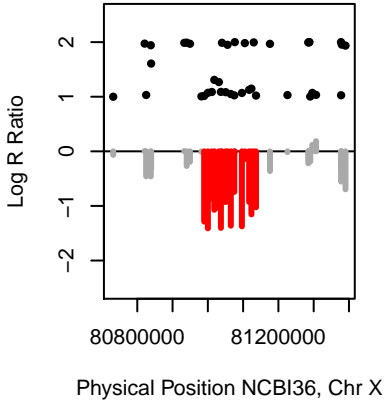

4225320193\_B, nprobe = 12

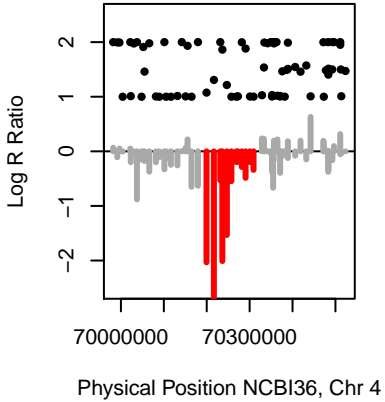

4225320193\_B, nprobe = 15

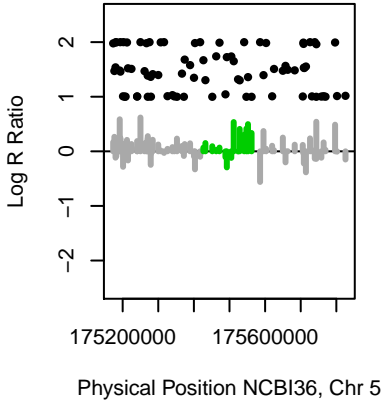

4225320193\_B, nprobe = 25

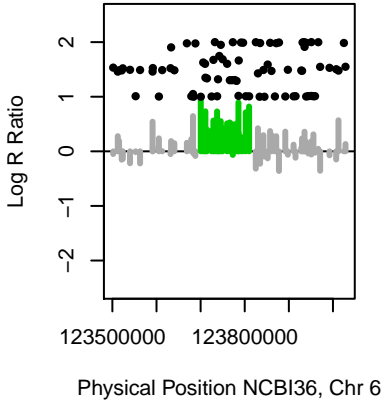

4225320193\_B, nprobe = 21

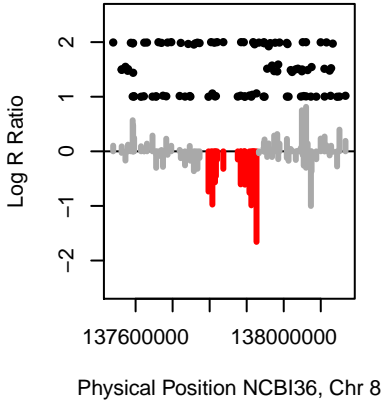

4225320193\_B, nprobe = 12

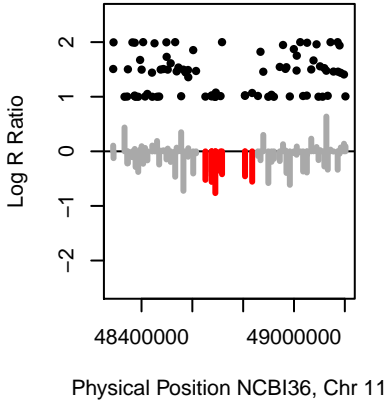

4225320193\_B, nprobe = 8

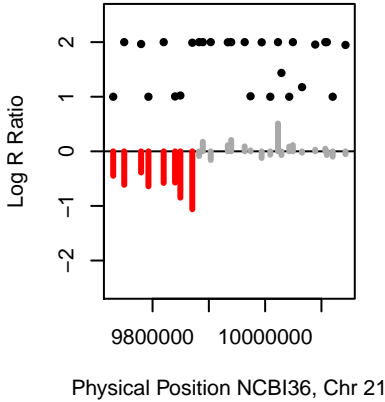

4225320193\_B, nprobe = 10

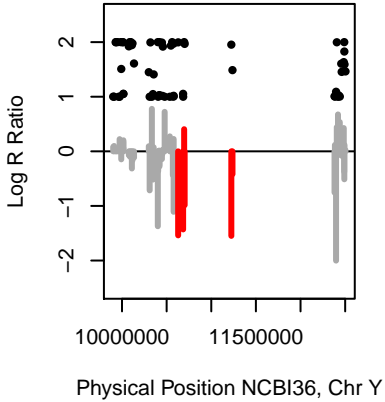

4225320193\_B, nprobe = 10

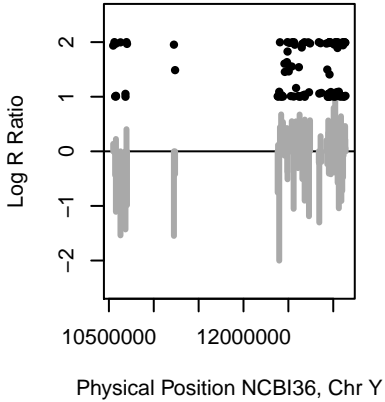

4225320193\_B, nprobe = 24

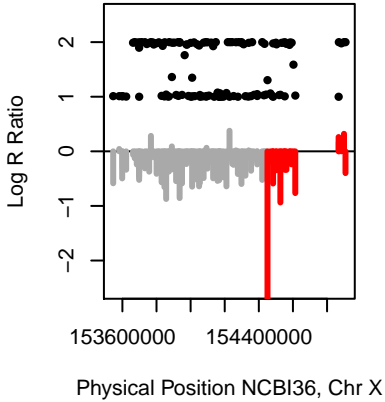

4225320283\_A, nprobe = 10

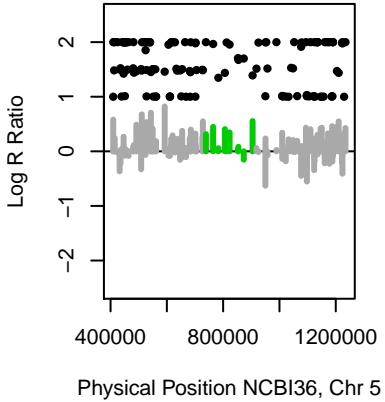

4225320283\_A, nprobe = 16

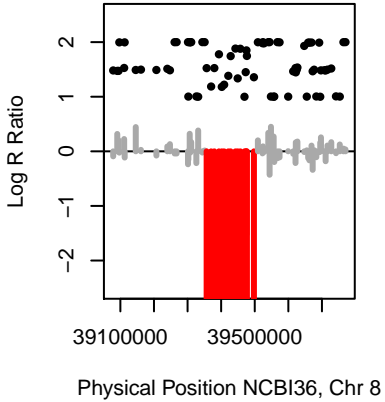

4225320283\_A, nprobe = 36

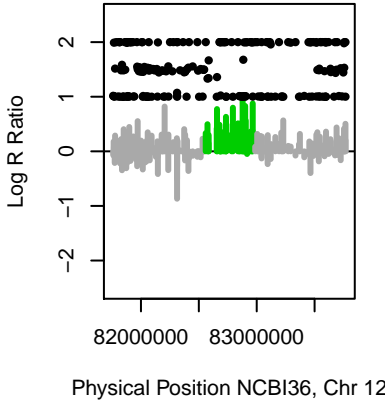

4225320283\_A, nprobe = 26

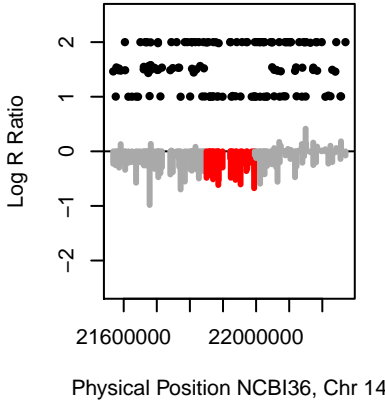

4225320283\_A, nprobe = 10

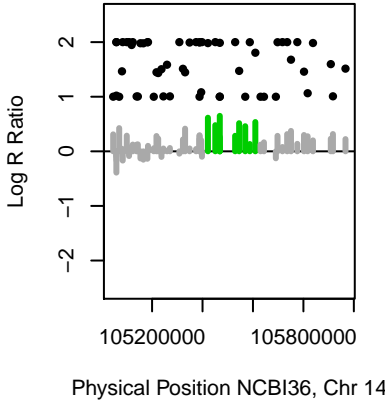

4225320283\_A, nprobe = 14

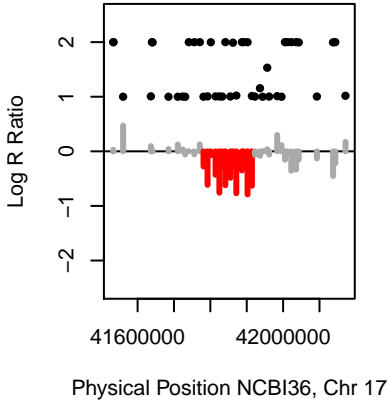

4225320283\_A, nprobe = 24

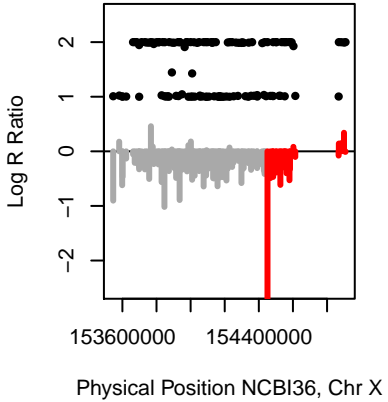

4252441724\_B, nprobe = 19

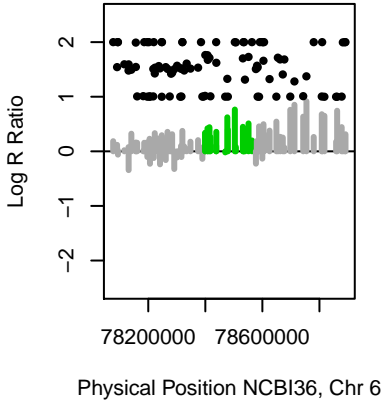

4252441724\_B, nprobe = 28

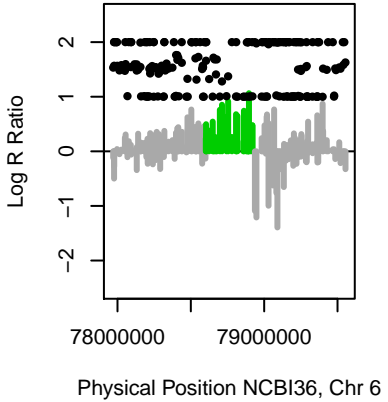

4252441724\_B, nprobe = 37

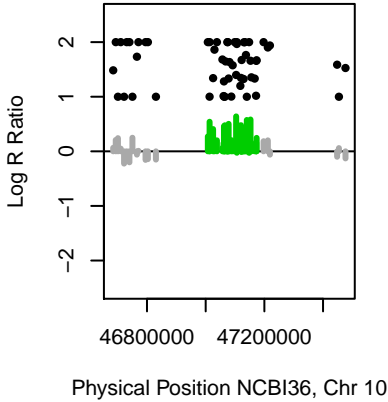

4252441724\_B, nprobe = 26

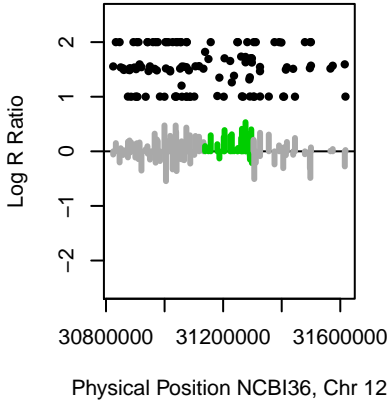

4252441724\_B, nprobe = 29

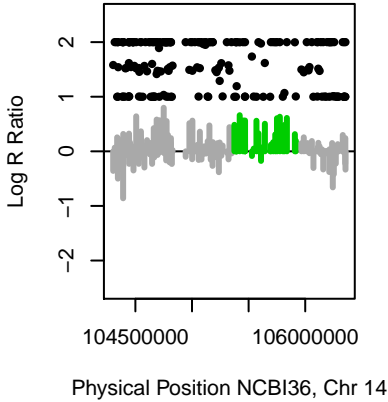

4252441724\_B, nprobe = 13

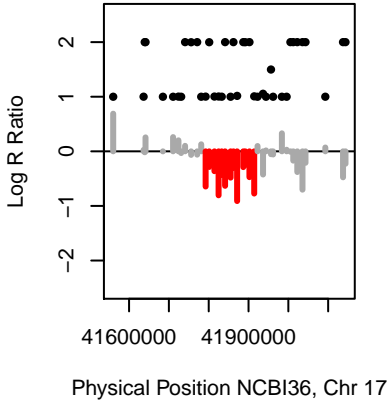

4225320235\_A, nprobe = 19

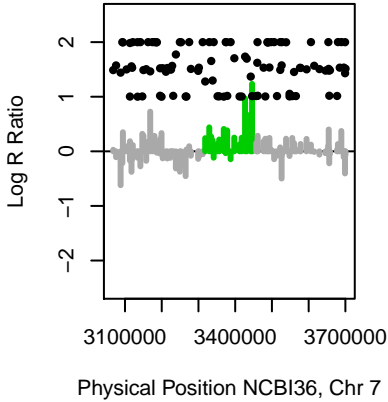

4225320235\_A, nprobe = 6

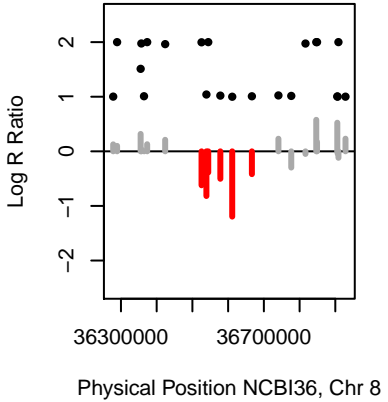

4225320235\_A, nprobe = 16

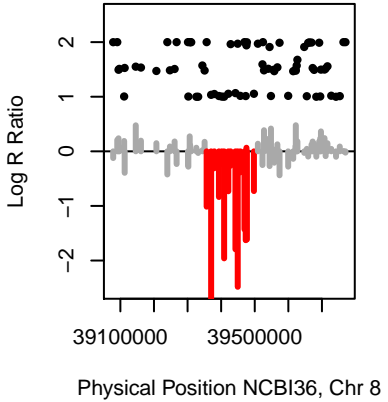

4225320235\_A, nprobe = 13

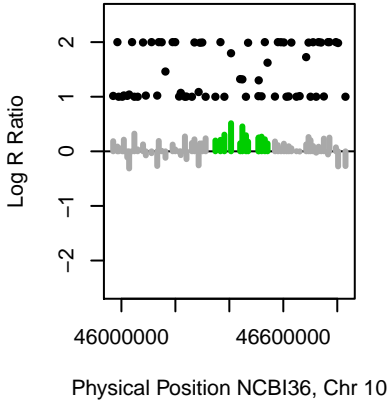

4225320235\_A, nprobe = 31

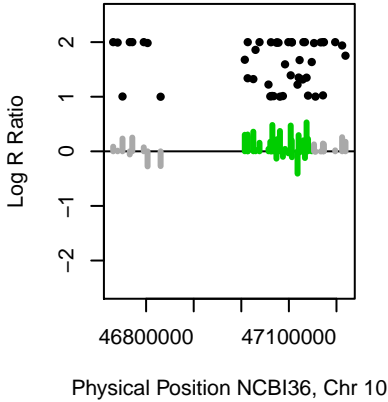

4225320235\_A, nprobe = 31

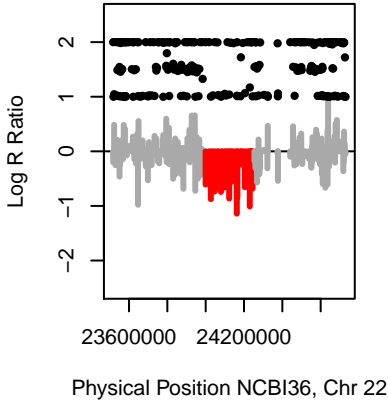

4225320235\_A, nprobe = 10

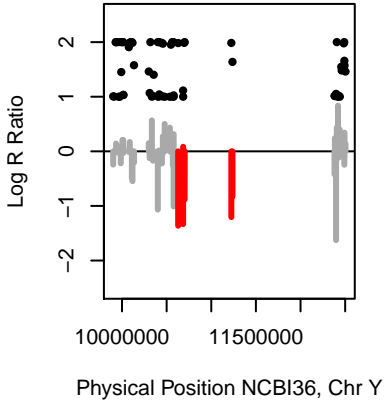

4225320235\_A, nprobe = 10

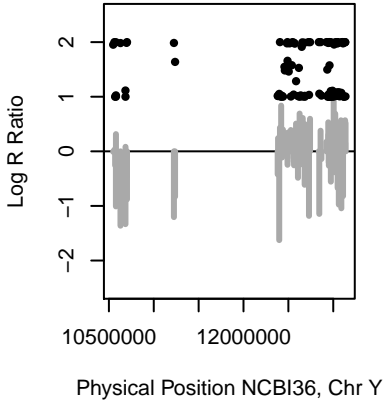





4225320579\_A, nprobe = 14

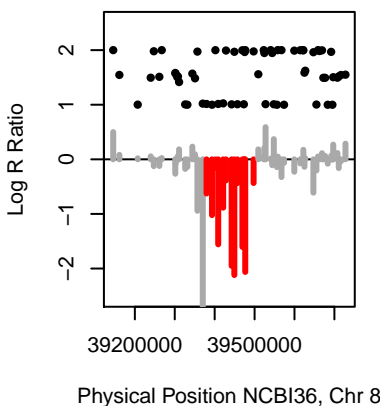

4225320579\_A, nprobe = 37

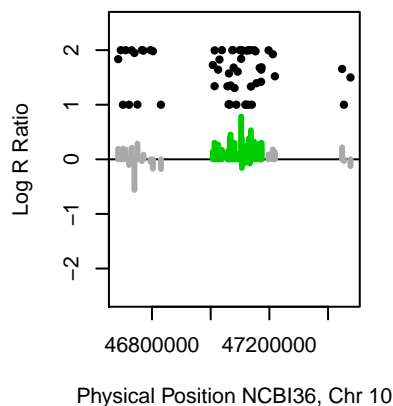

4225320579\_A, nprobe = 43

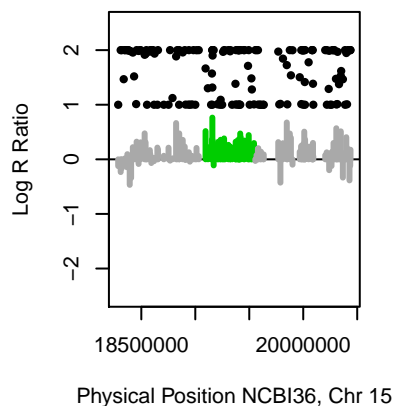

4225320579\_A, nprobe = 8

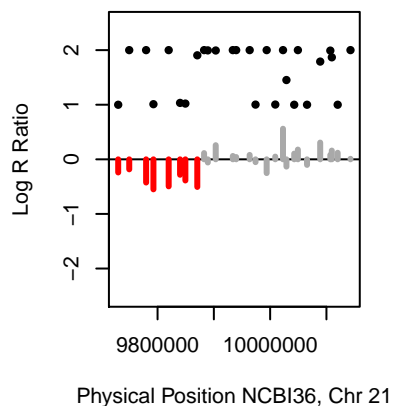

4225320579\_A, nprobe = 3

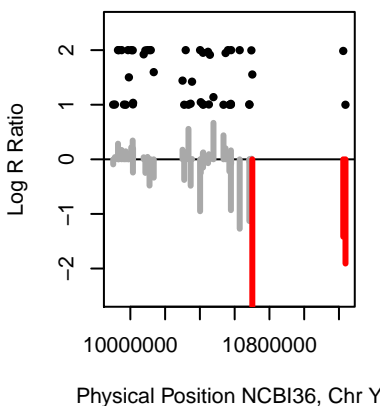

4225320579\_A, nprobe = 24

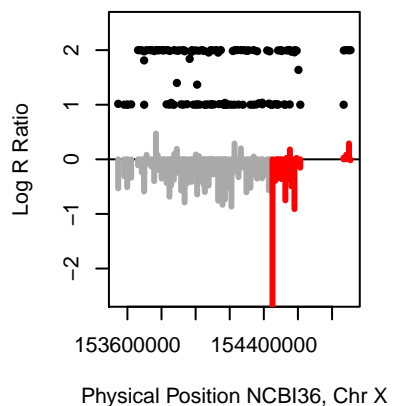

4225320416\_B, nprobe = 13

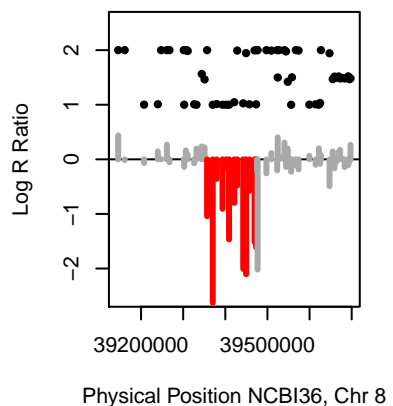

4225320416\_B, nprobe = 12

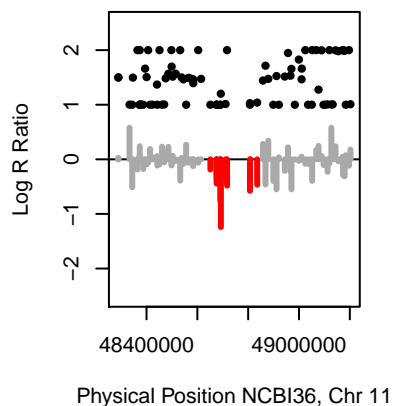

4225320416\_B, nprobe = 9

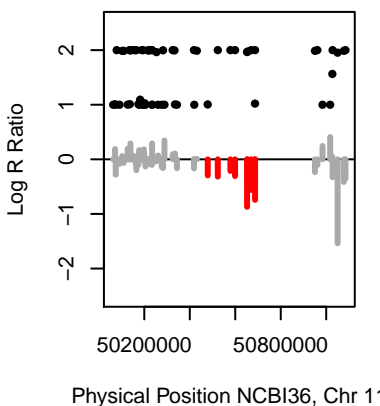

4225320416\_B, nprobe = 16

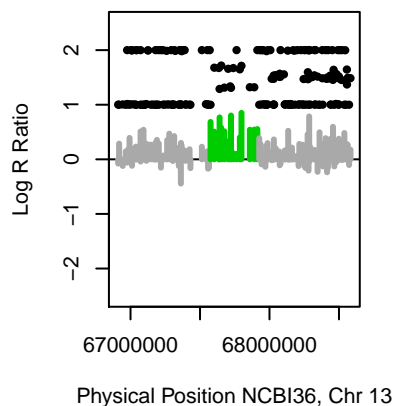

4225320416\_B, nprobe = 16

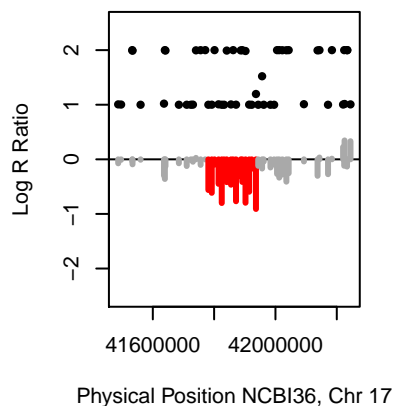

4225320416\_B, nprobe = 8

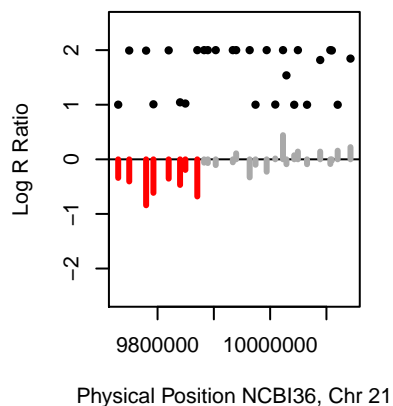

4225320416\_B, nprobe = 25

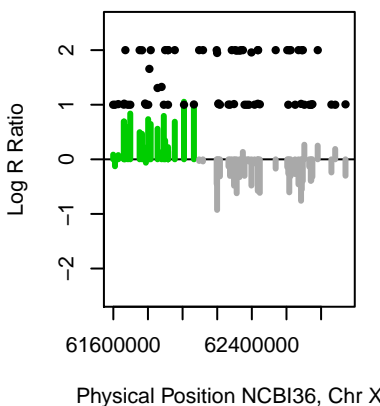

4225320142\_A, nprobe = 15

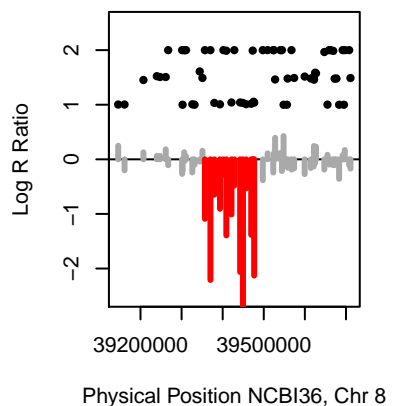

4225320142\_A, nprobe = 10

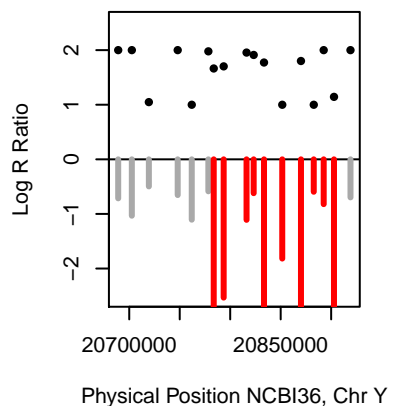

4225320142\_A, nprobe = 24

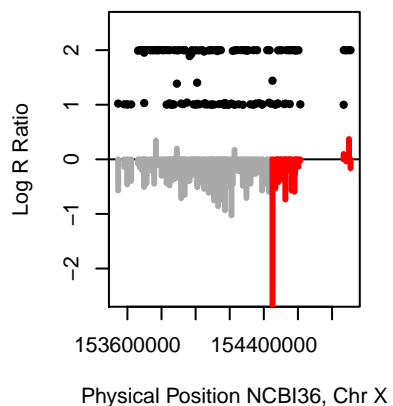

4225320212\_B, nprobe = 15

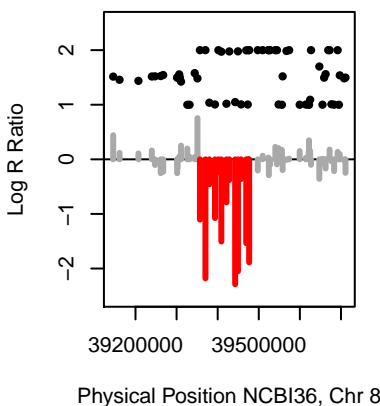

4225320212\_B, nprobe = 12

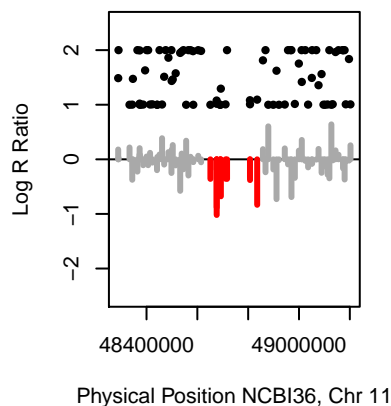

4225320212\_B, nprobe = 8

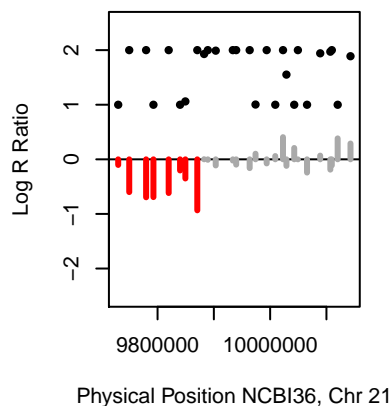

4225320212\_B, nprobe = 48

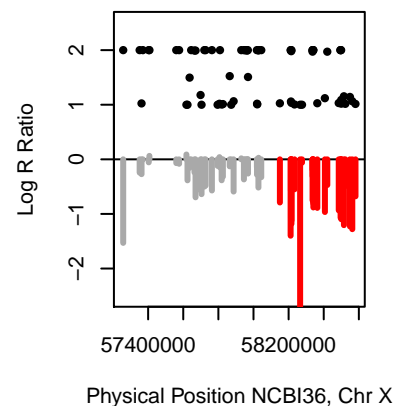

4225320212\_B, nprobe = 48

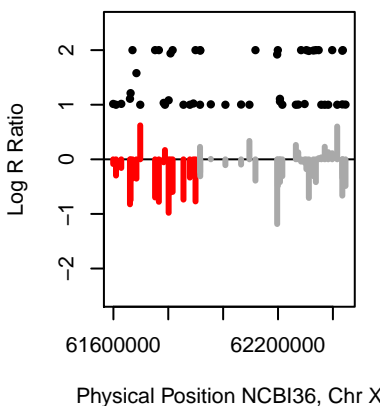

4225320212\_B, nprobe = 24

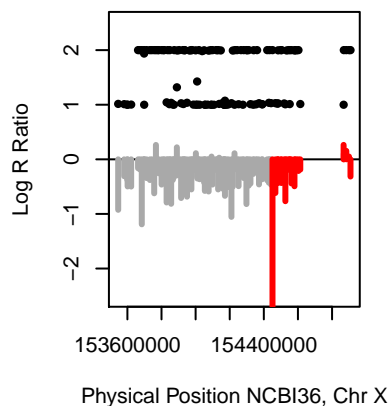

4225320086\_B, nprobe = 15

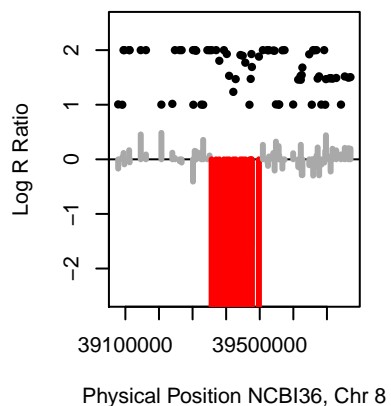

4225320086\_B, nprobe = 11

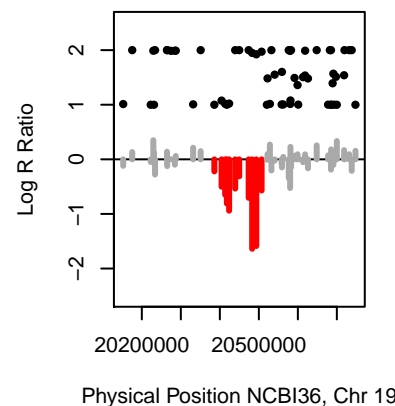

4225320086\_B, nprobe = 24

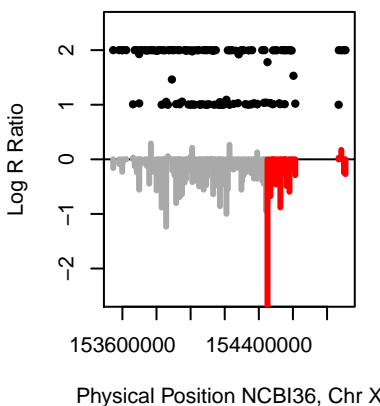

4225320220\_A, nprobe = 16

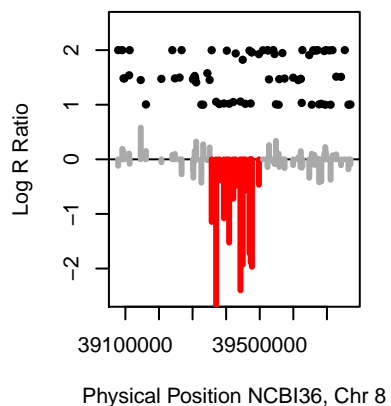

4225320220\_A, nprobe = 26

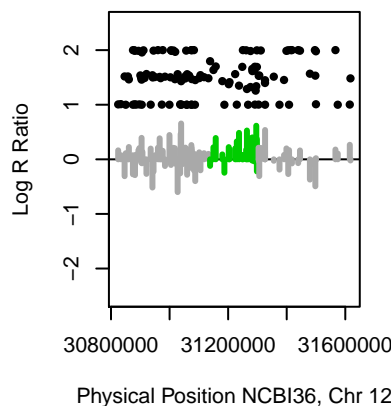

4225320220\_A, nprobe = 27

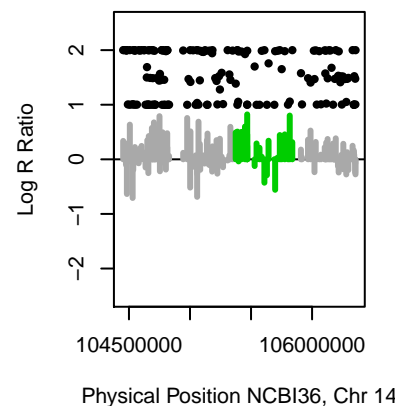

4225320220\_A, nprobe = 16

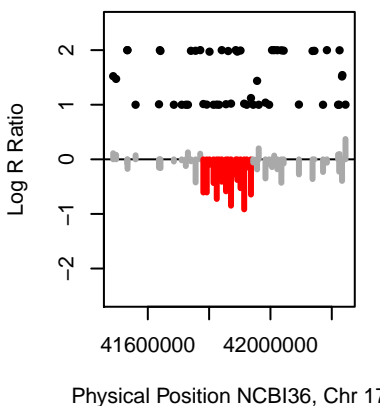

4225320220\_A, nprobe = 8

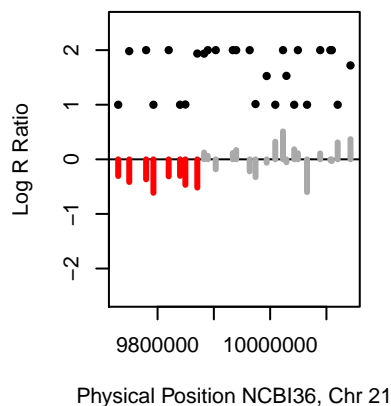

4225320220\_A, nprobe = 77

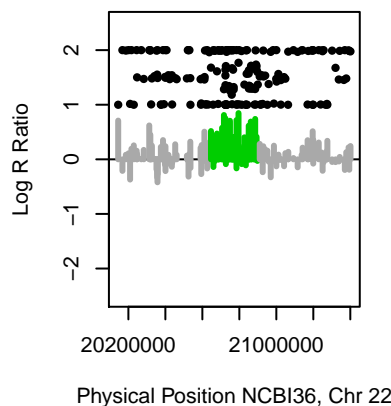

4225320423\_B, nprobe = 16

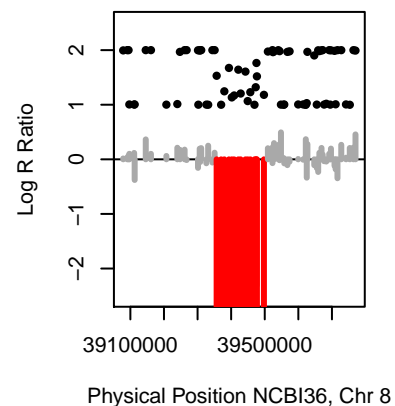

4225320423\_B, nprobe = 11

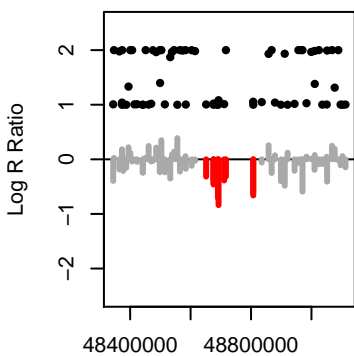

Physical Position NCBI36, Chr 11

4225320423\_B, nprobe = 35

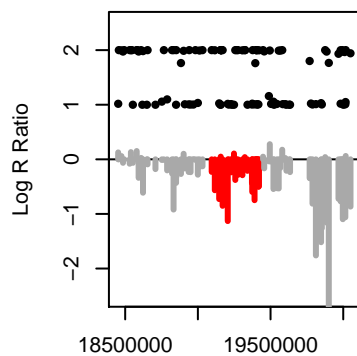

Physical Position NCBI36, Chr 15

4225320423\_B, nprobe = 25

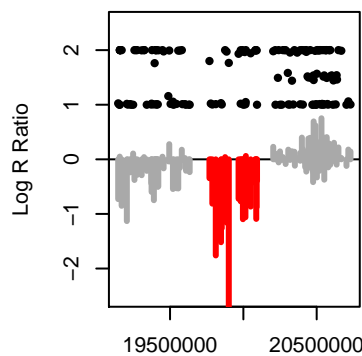

Physical Position NCBI36, Chr 15

4225320423\_B, nprobe = 15

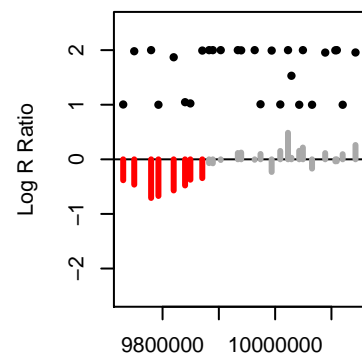

Physical Position NCBI36, Chr 21

4225320423\_B, nprobe = 29

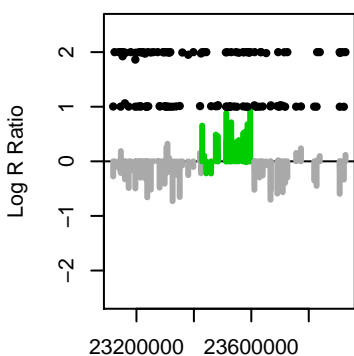

Physical Position NCBI36, Chr X

4225320261\_A, nprobe = 16

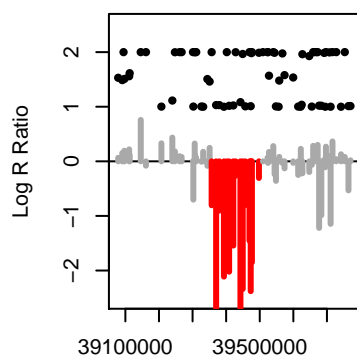

Physical Position NCBI36, Chr 8

4225320261\_A, nprobe = 25

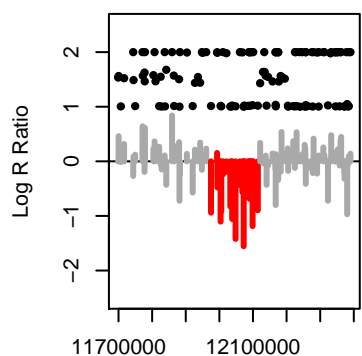

Physical Position NCBI36, Chr 9

4225320261\_A, nprobe = 46

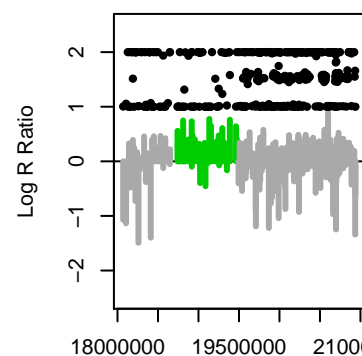

Physical Position NCBI36, Chr 14

4225320261\_A, nprobe = 18

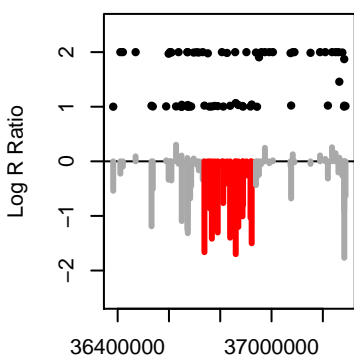

Physical Position NCBI36, Chr X

4225320261\_A, nprobe = 100

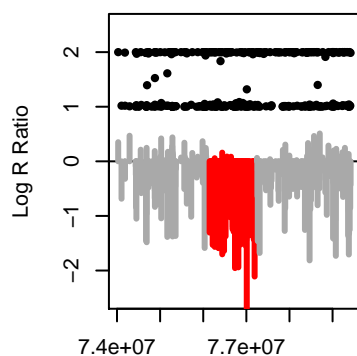

Physical Position NCBI36, Chr X

4225320278\_B, nprobe = 16

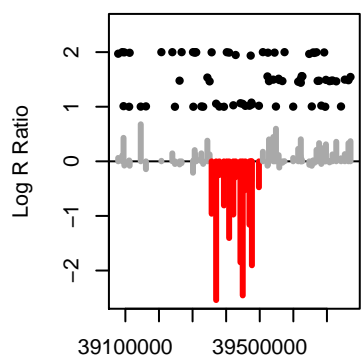

Physical Position NCBI36, Chr 8

4225320278\_B, nprobe = 39

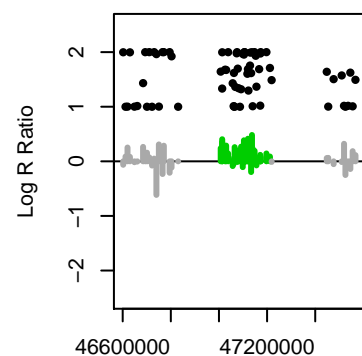

Physical Position NCBI36, Chr 10

4225320278\_B, nprobe = 28

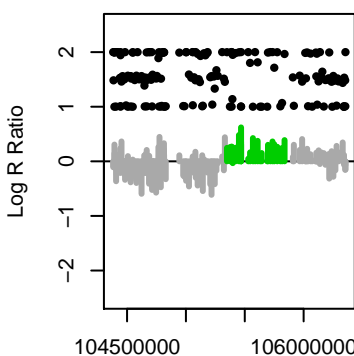

Physical Position NCBI36, Chr 14

4225320463\_A, nprobe = 16

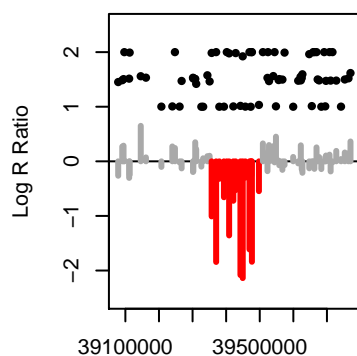

Physical Position NCBI36, Chr 8

4225320463\_A, nprobe = 18

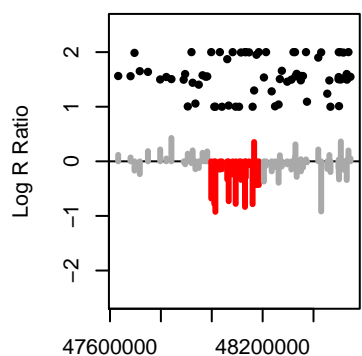

Physical Position NCBI36, Chr 19

4225320790\_A, nprobe = 16

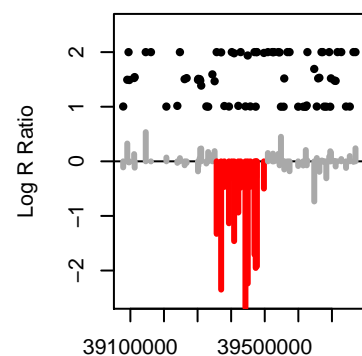

Physical Position NCBI36, Chr 8

4225320791\_A, nprobe = 16

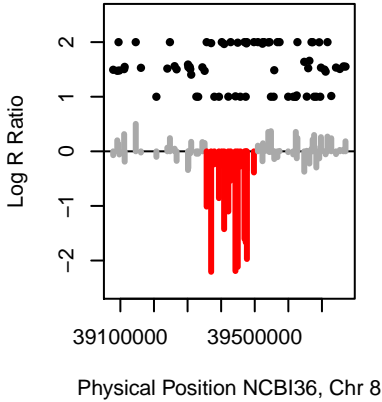

4225320791\_A, nprobe = 22

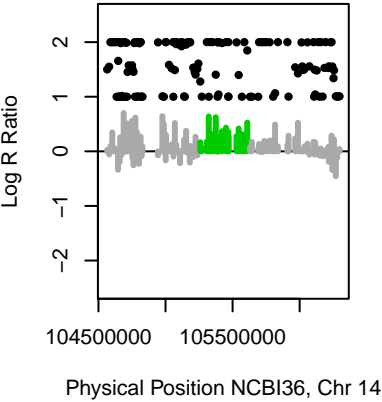

4225320791\_A, nprobe = 15

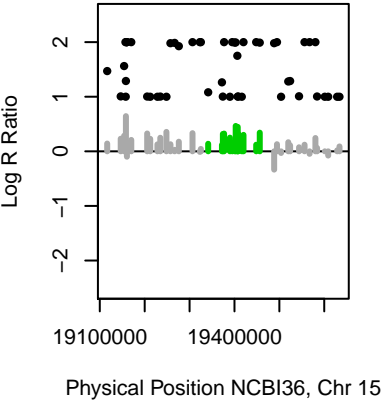

4225320791\_A, nprobe = 16

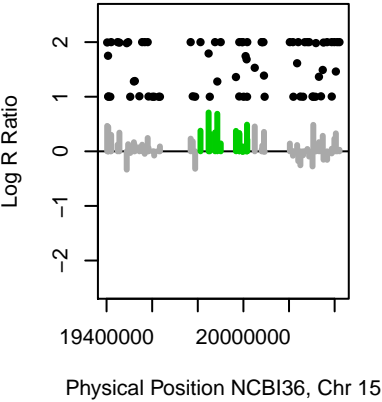

4225320791\_A, nprobe = 13

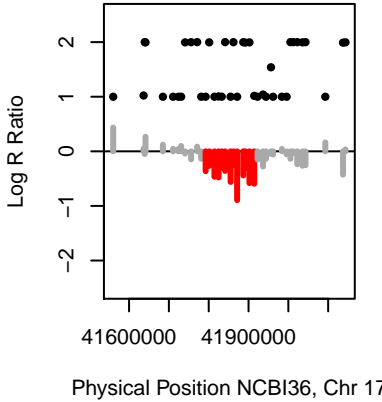

4225320791\_A, nprobe = 31

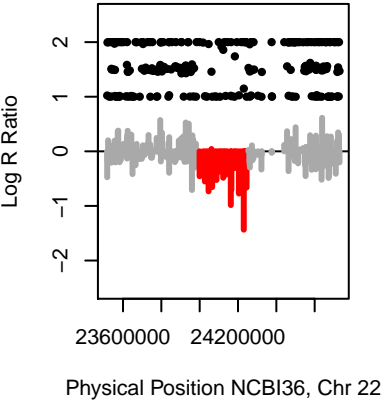

4225320791\_A, nprobe = 34

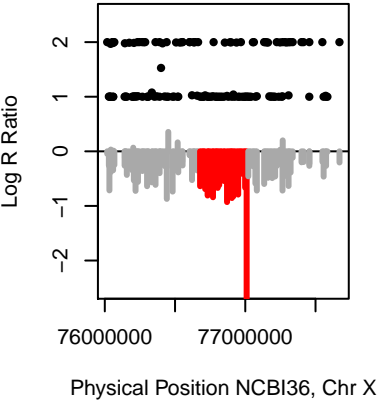

4225320791\_A, nprobe = 188

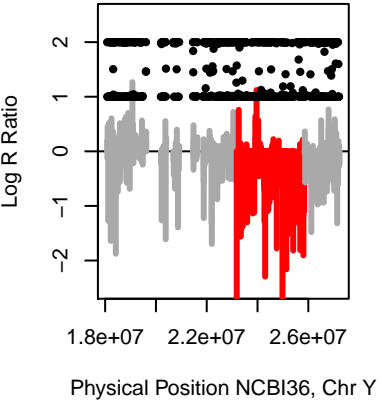

4225320301\_A, nprobe = 32

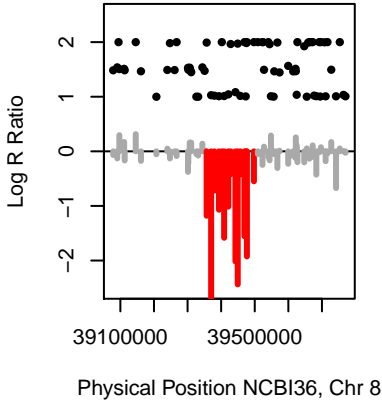

4225320301\_A, nprobe = 25

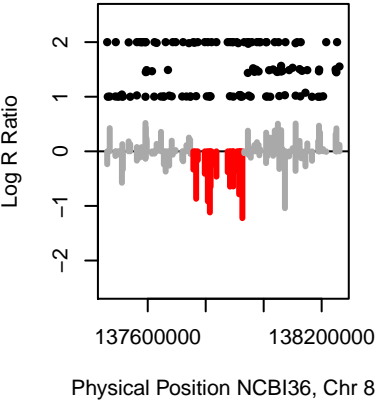

4225320301\_A, nprobe = 24

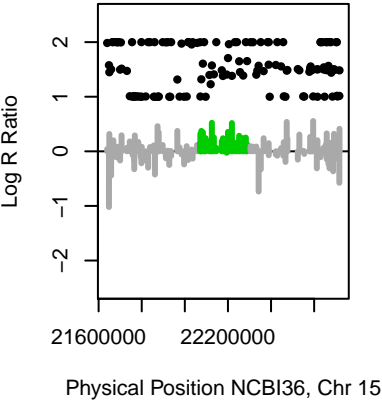

4225320301\_A, nprobe = 8

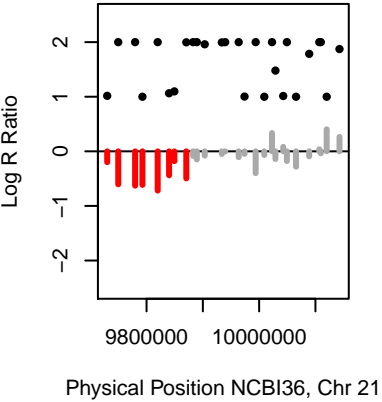

4225320831\_B, nprobe = 25

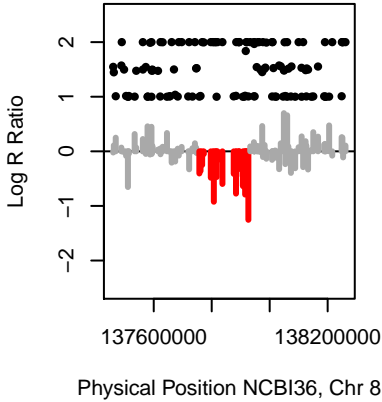

4225320831\_B, nprobe = 20

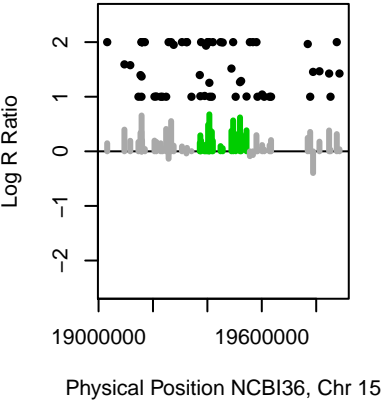

4225320480\_B, nprobe = 11

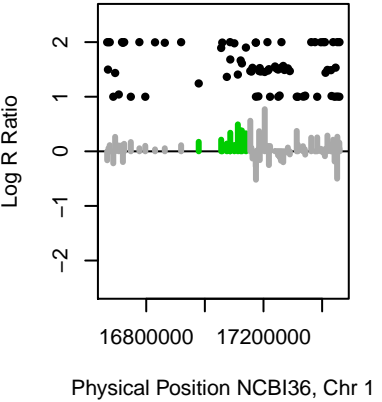

4225320480\_B, nprobe = 30

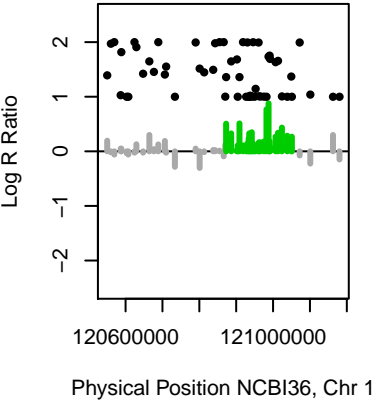

Physical Position NCBI36, Chr 4

Scatter plot showing Log R Ratio (Y-axis, ranging from -2 to 2) versus Physical Position NCBI36, Chr 8 (X-axis, ranging from 39100000 to 39500000). The plot displays a dense cluster of red points (likely indicating significant deviations or deletions) centered around 39400000, reaching down to -2.5. Other points are colored black and grey, mostly clustered around the zero line.

4225320273\_B, nprobe = 10

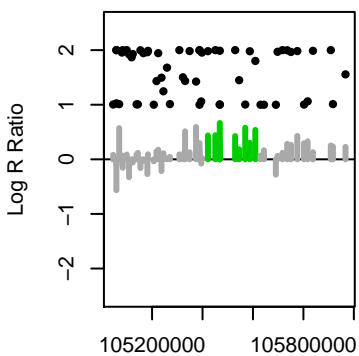

Physical Position NCBI36, Chr 14

4225320273\_B, nprobe = 7

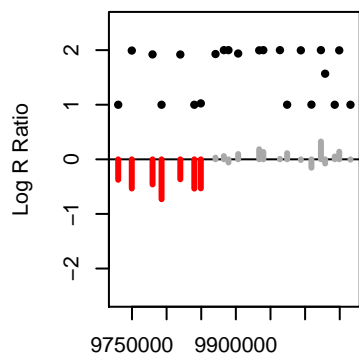

Physical Position NCBI36, Chr 21

4225320273\_B, nprobe = 28

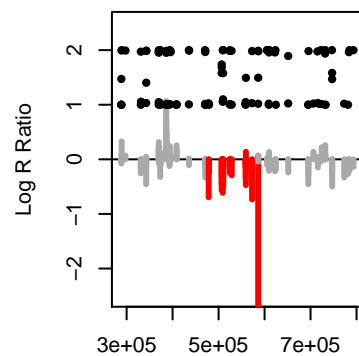

Physical Position NCBI36, Chr X

4225320273\_B, nprobe = 10

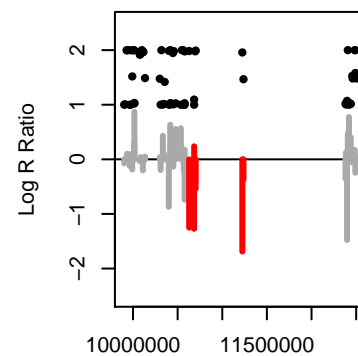

Physical Position NCBI36, Chr Y

4225320273\_B, nprobe = 10

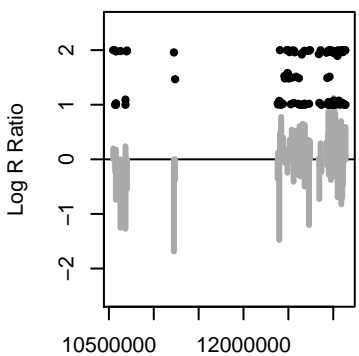

Physical Position NCBI36, Chr Y

4225320273\_B, nprobe = 24

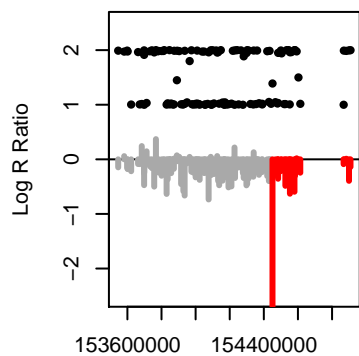

Physical Position NCBI36, Chr X

4225320793\_B, nprobe = 17

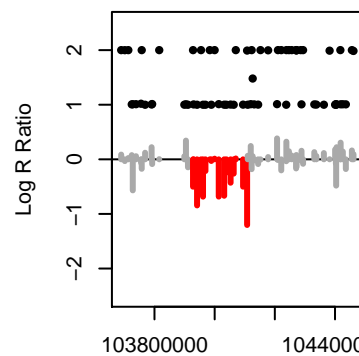

Physical Position NCBI36, Chr 1

4225320793\_B, nprobe = 26

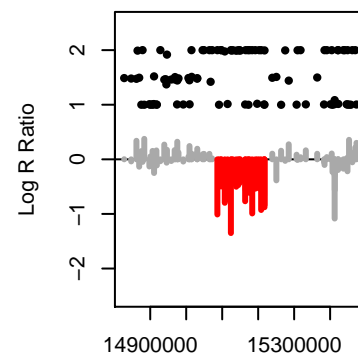

Physical Position NCBI36, Chr 7

4225320793\_B, nprobe = 25

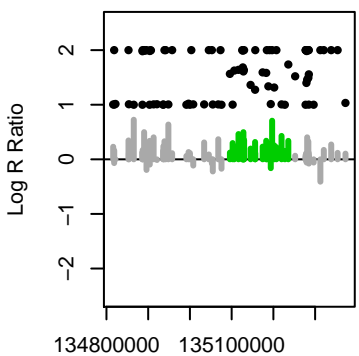

Physical Position NCBI36, Chr 10

4225320793\_B, nprobe = 35

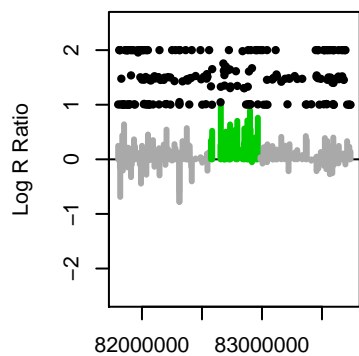

Physical Position NCBI36, Chr 12

4225320793\_B, nprobe = 14

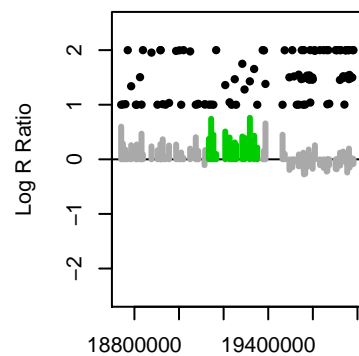

Physical Position NCBI36, Chr 14

4225320793\_B, nprobe = 15

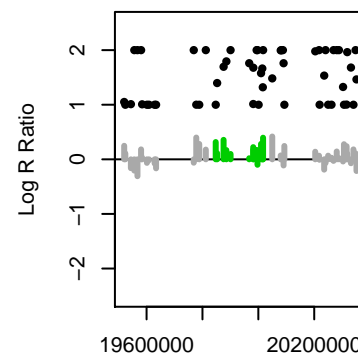

Physical Position NCBI36, Chr 15

4225320793\_B, nprobe = 10

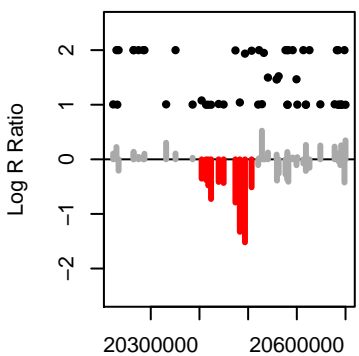

Physical Position NCBI36, Chr 19

4225320793\_B, nprobe = 26

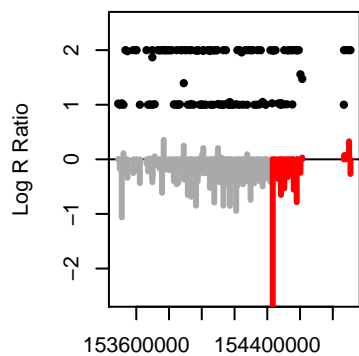

Physical Position NCBI36, Chr X

4225320293\_A, nprobe = 15

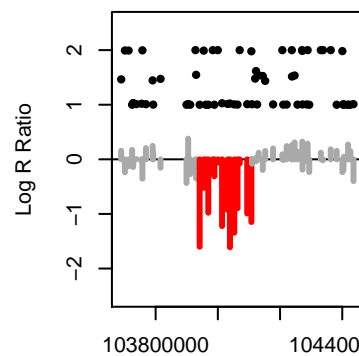

Physical Position NCBI36, Chr 1

4225320293\_A, nprobe = 11

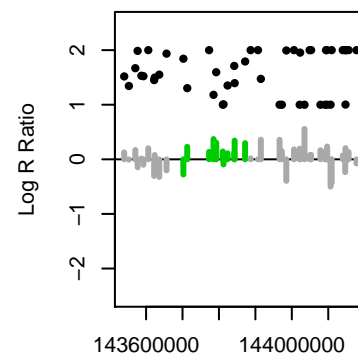

Physical Position NCBI36, Chr 1

4225320293\_A, nprobe = 25

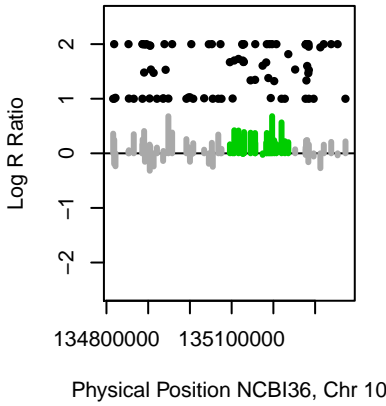

4225320293\_A, nprobe = 20

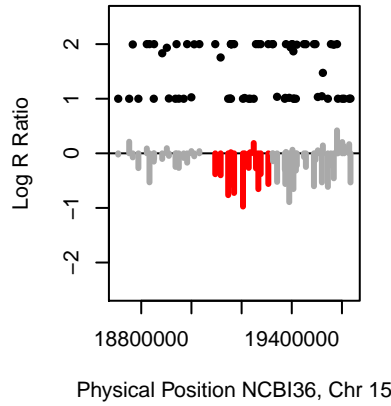

4225320293\_A, nprobe = 10

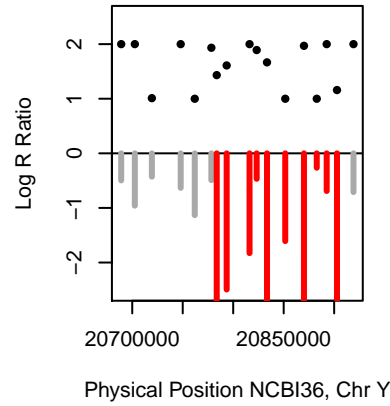

4225320135\_A, nprobe = 16

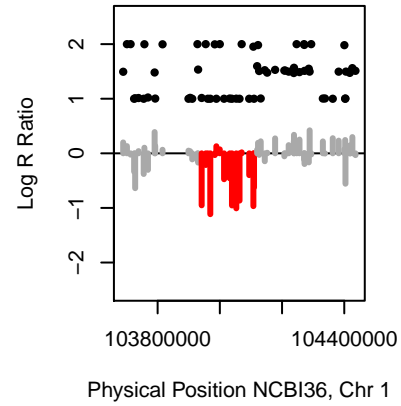

4225320135\_A, nprobe = 14

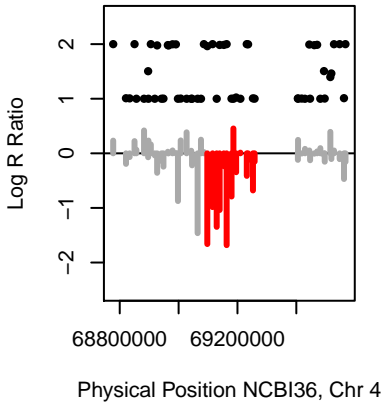

4225320135\_A, nprobe = 15

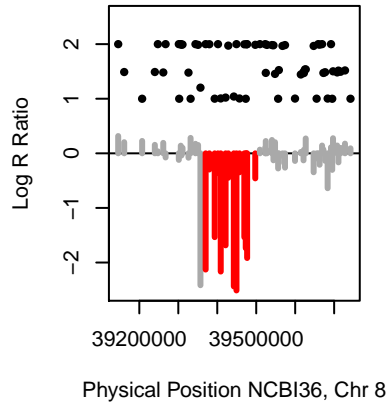

4225320135\_A, nprobe = 10

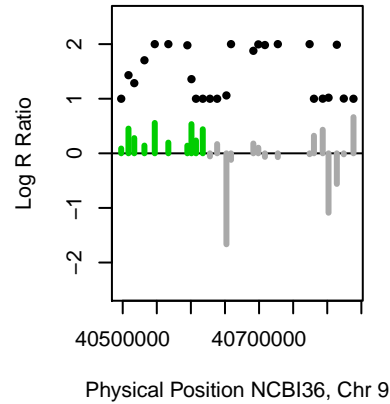

4225320135\_A, nprobe = 11

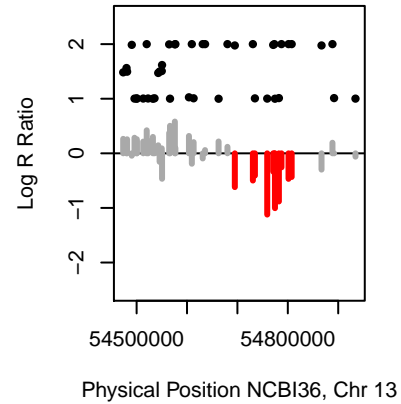

4225320135\_A, nprobe = 30

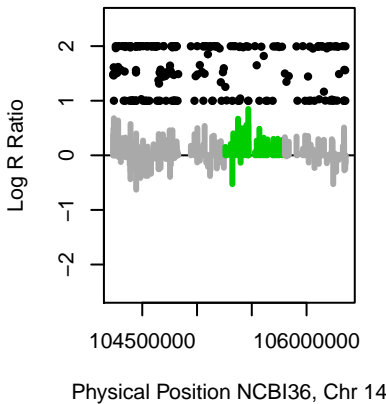

4225320135\_A, nprobe = 27

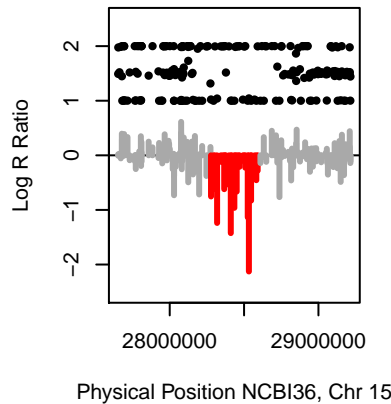

4225320135\_A, nprobe = 18

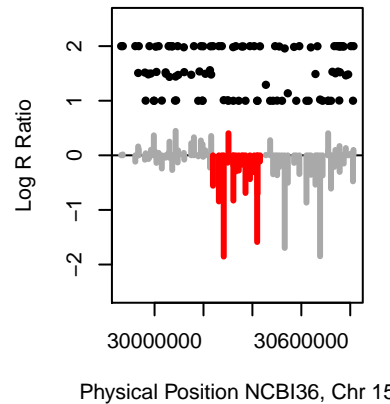

4225320135\_A, nprobe = 8

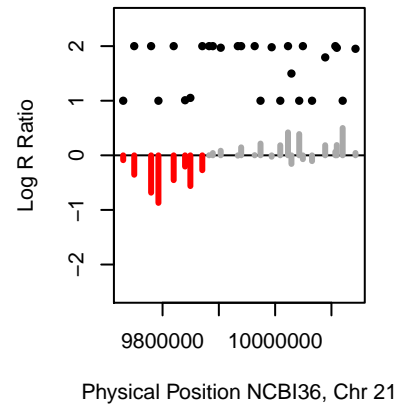

4225320135\_A, nprobe = 96

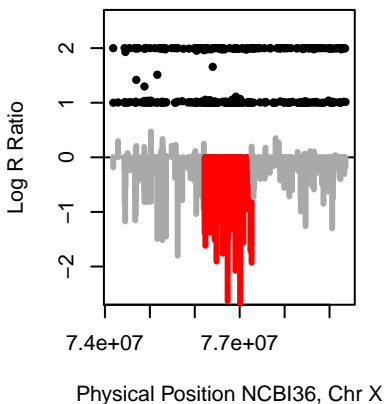

4225320135\_A, nprobe = 24

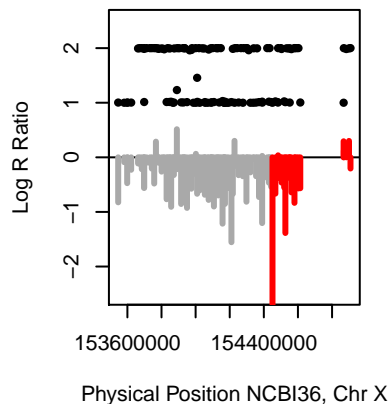

4225320224\_B, nprobe = 16

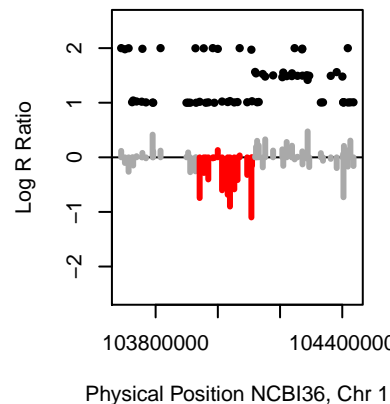

4225320224\_B, nprobe = 10

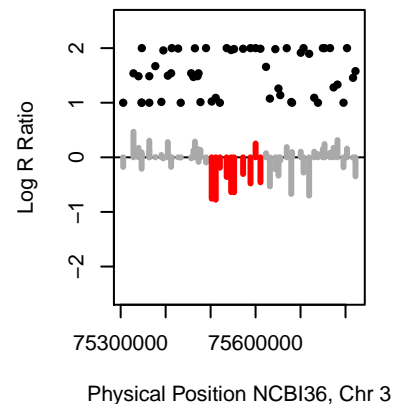



4225320224\_B, nprobe = 16

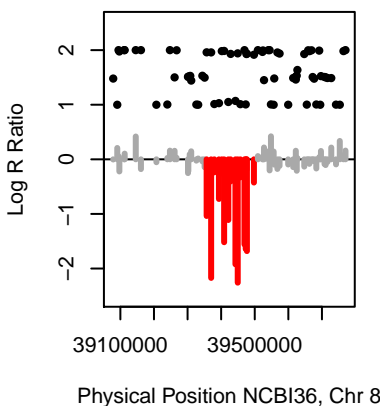

4225320224\_B, nprobe = 29

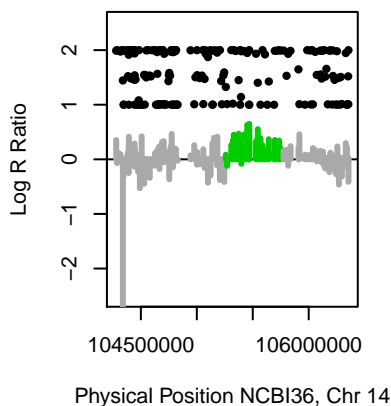

4225320224\_B, nprobe = 15

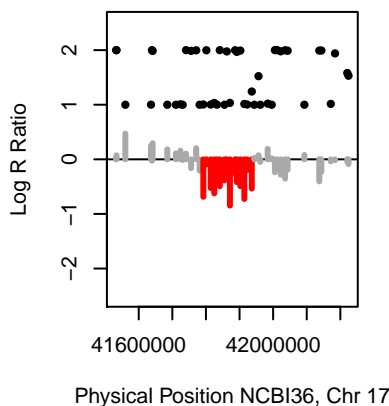

4225320224\_B, nprobe = 24

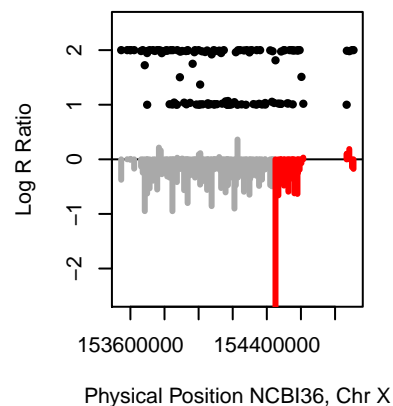

4225320032\_A, nprobe = 7

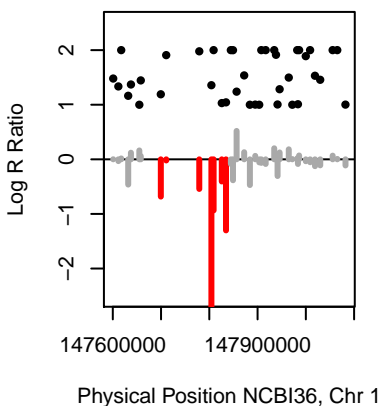

4225320032\_A, nprobe = 60

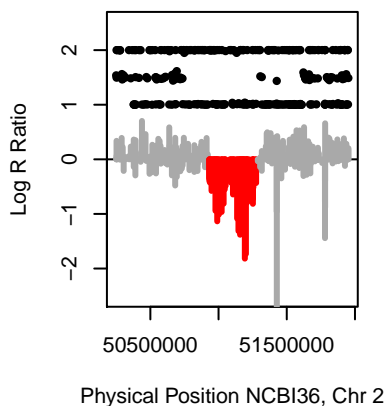

4225320032\_A, nprobe = 28

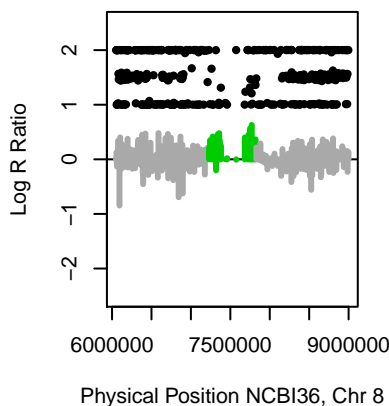

4225320032\_A, nprobe = 14

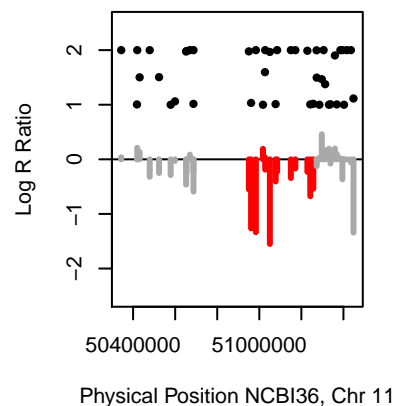

4225320032\_A, nprobe = 7

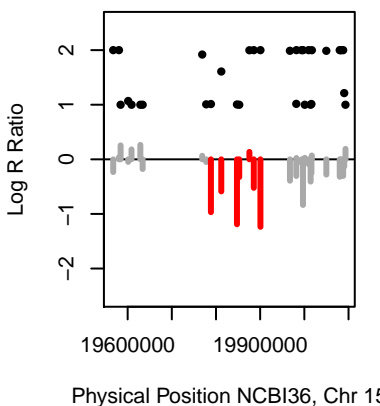

4225320032\_A, nprobe = 17

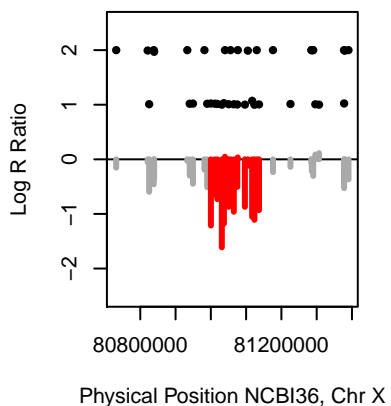

4225320032\_A, nprobe = 16

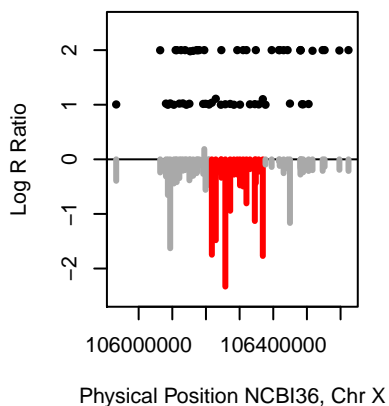

4225320279\_A, nprobe = 12

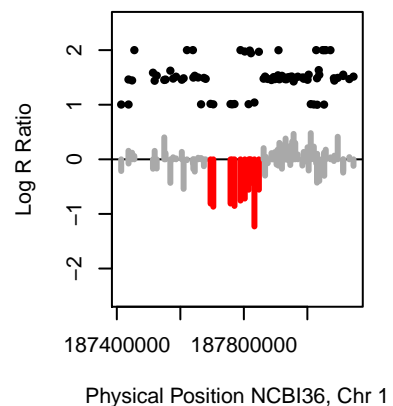

4225320279\_A, nprobe = 15

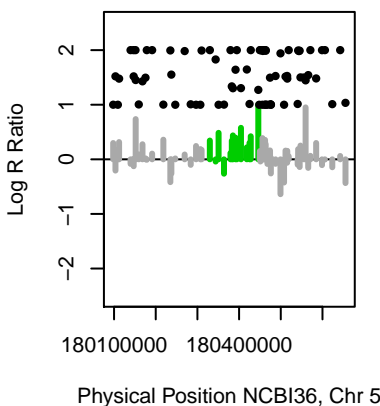

4225320279\_A, nprobe = 16

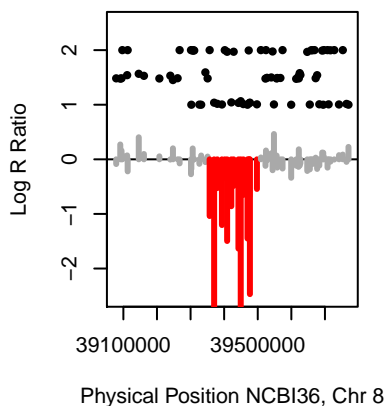

4225320279\_A, nprobe = 15

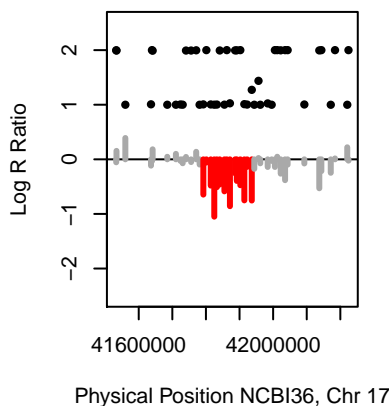

4225320279\_A, nprobe = 8

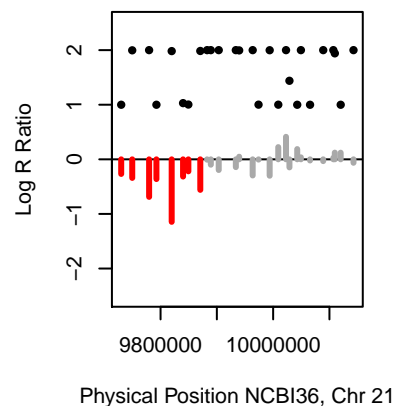

Physical Position NCBI36, Chr 5

4225320770\_B, nprobe = 25

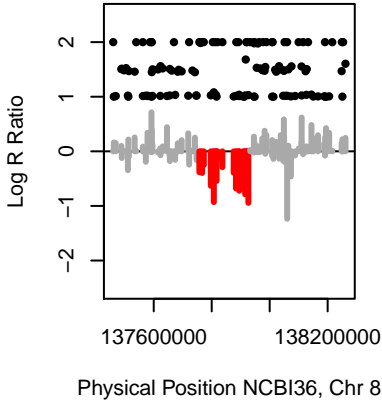

4225320770\_B, nprobe = 31

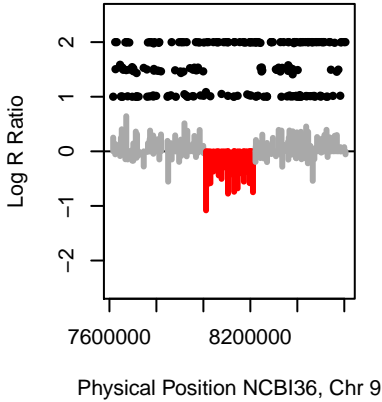

4225320770\_B, nprobe = 10

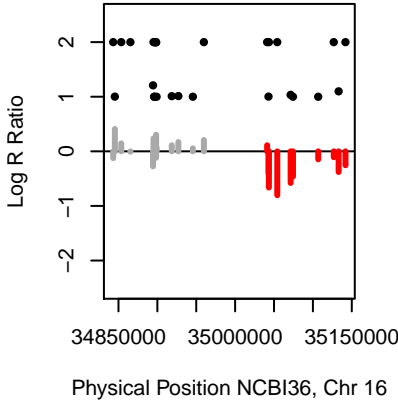

4225320770\_B, nprobe = 18

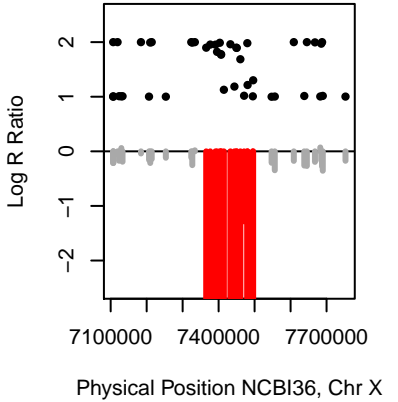

4225320770\_B, nprobe = 24

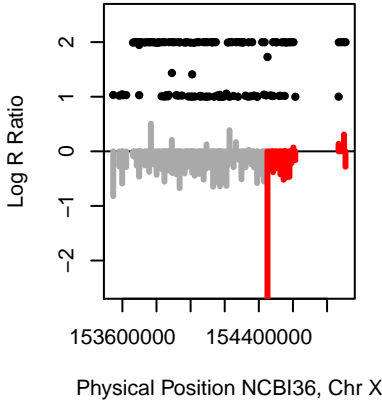

4225320793\_A, nprobe = 17

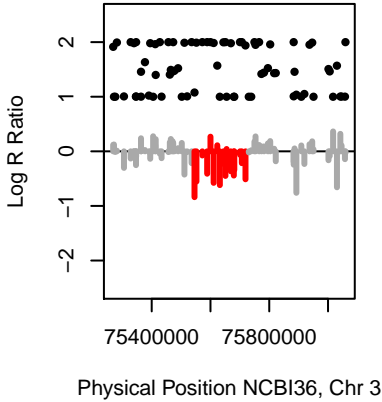

4225320793\_A, nprobe = 22

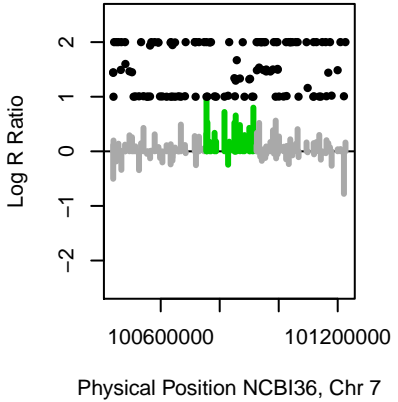

4225320793\_A, nprobe = 16

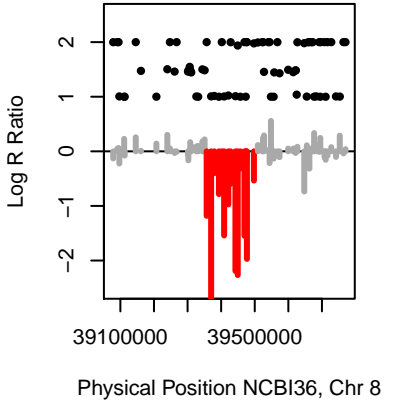

4225320793\_A, nprobe = 101

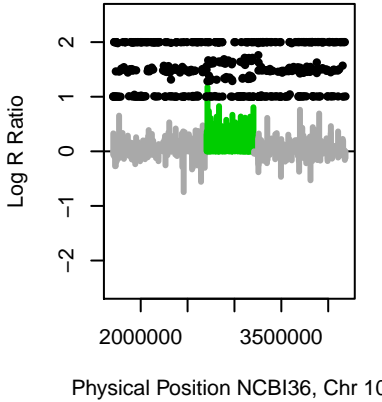

4225320793\_A, nprobe = 16

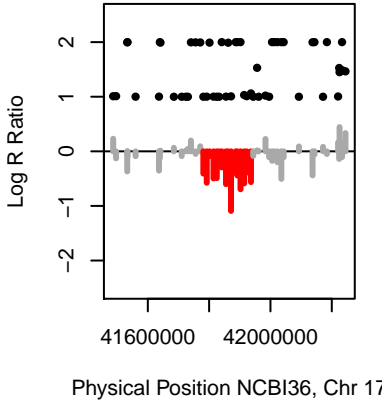

4225320793\_A, nprobe = 8

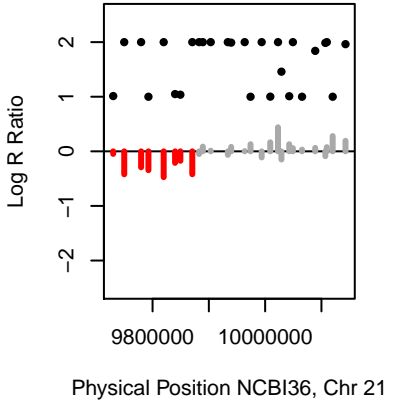

4225320793\_A, nprobe = 24

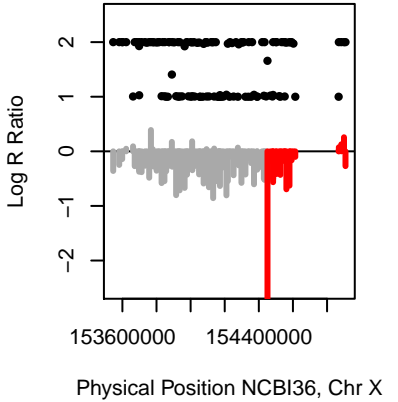

4225320213\_A, nprobe = 36

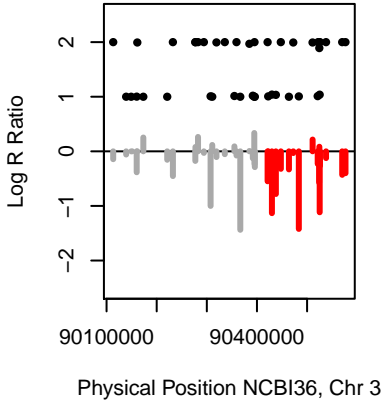

4225320213\_A, nprobe = 8

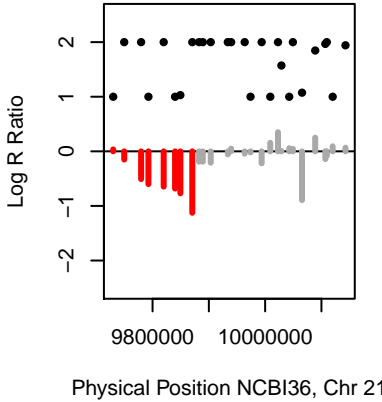

4225320213\_A, nprobe = 28

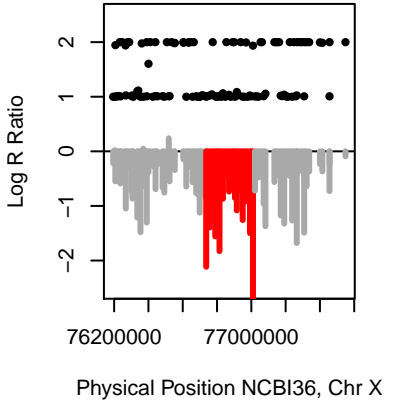

4225320213\_A, nprobe = 18

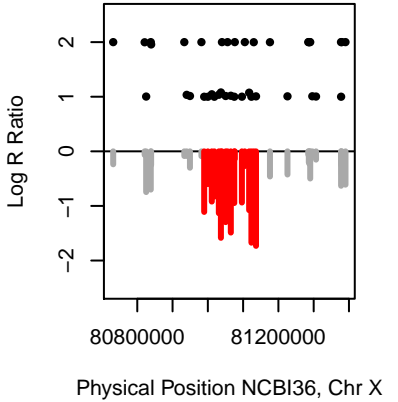

4225320022\_A, nprobe = 22

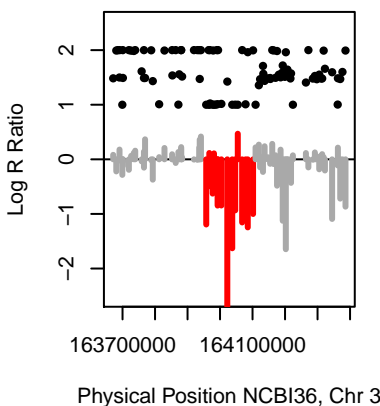

4225320022\_A, nprobe = 10

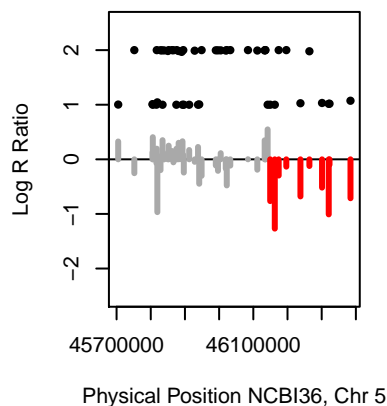

4225320022\_A, nprobe = 75

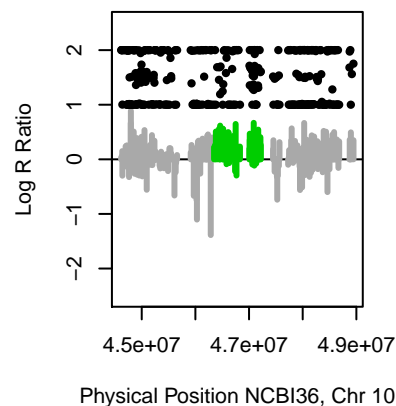

4225320022\_A, nprobe = 9

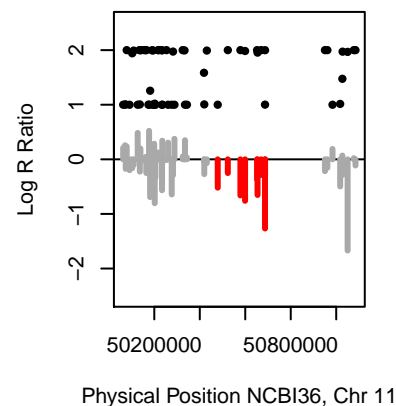

4225320022\_A, nprobe = 13

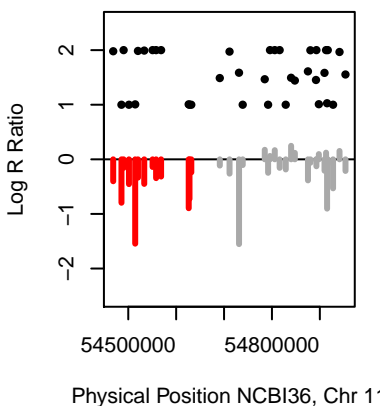

4225320022\_A, nprobe = 14

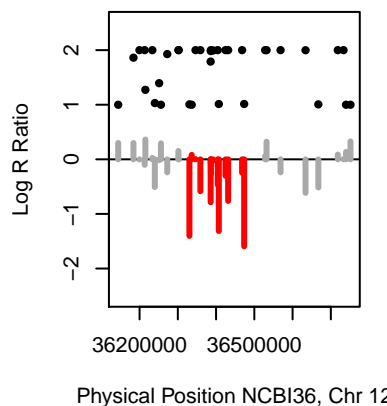

4225320022\_A, nprobe = 20

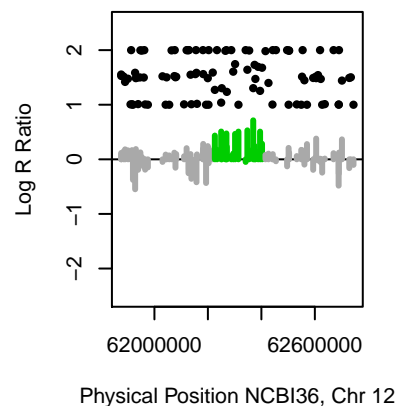

4225320022\_A, nprobe = 8

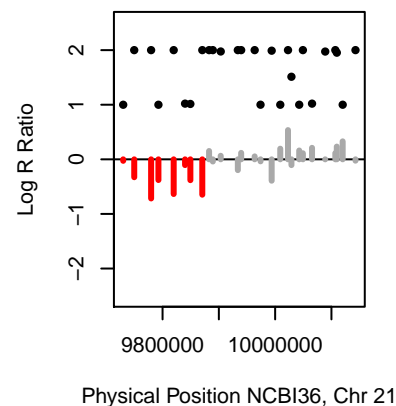

4225320022\_A, nprobe = 75

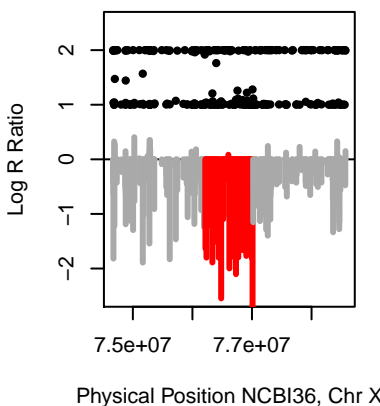

4225320257\_B, nprobe = 22

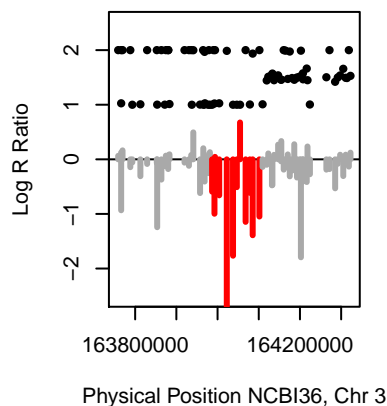

4225320257\_B, nprobe = 14

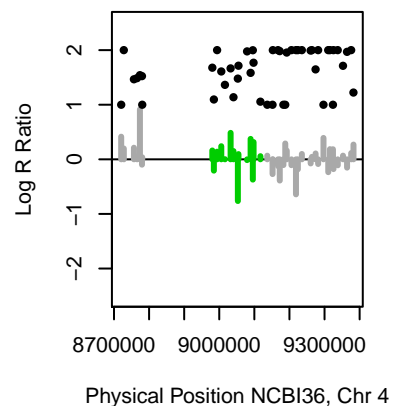

4225320257\_B, nprobe = 30

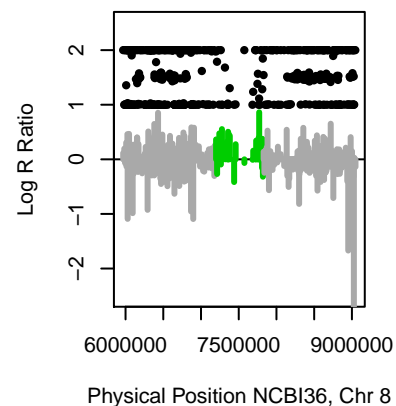

4225320257\_B, nprobe = 16

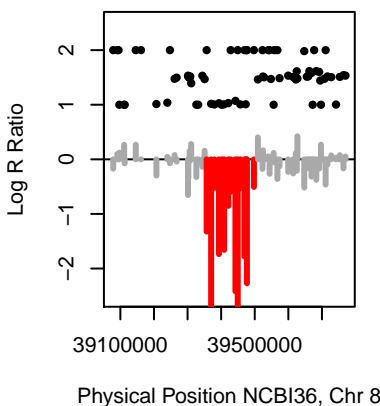

4225320257\_B, nprobe = 8

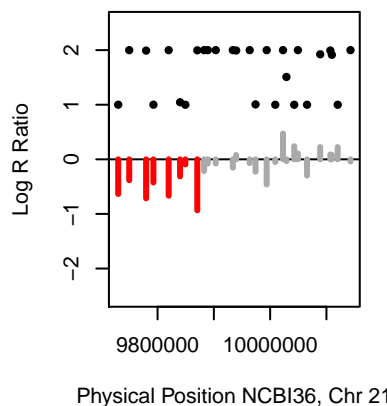

4225320257\_B, nprobe = 24

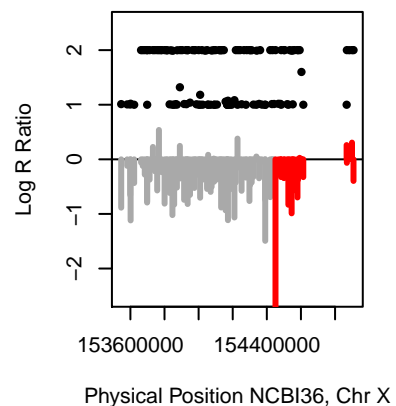

4225320213\_B, nprobe = 24

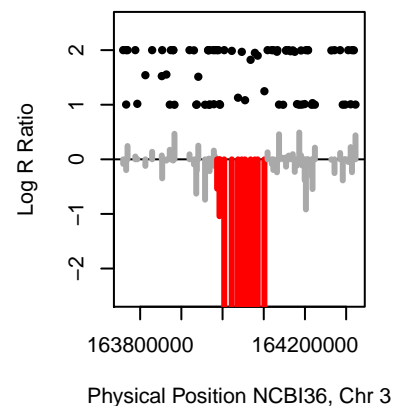

4225320213\_B, nprobe = 70

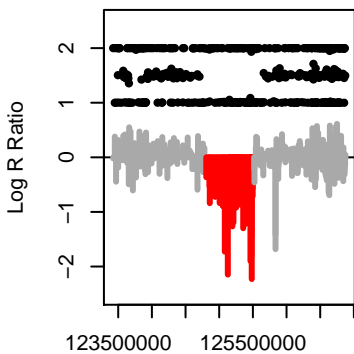

Physical Position NCBI36, Chr 7

4225320213\_B, nprobe = 29

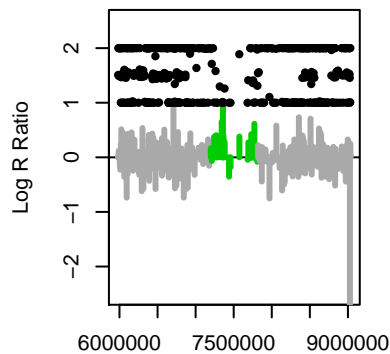

Physical Position NCBI36, Chr 8

4225320213\_B, nprobe = 15

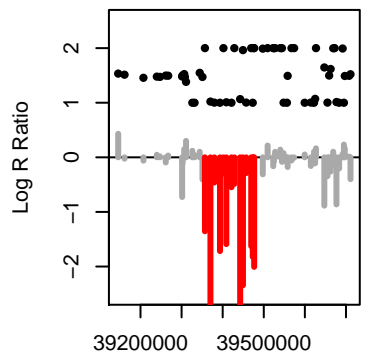

Physical Position NCBI36, Chr 8

4225320253\_A, nprobe = 10

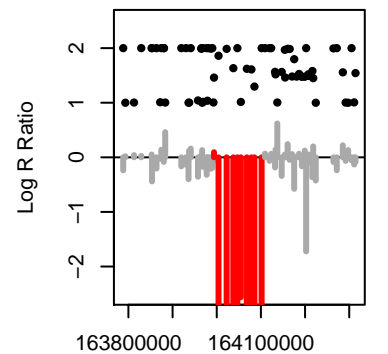

Physical Position NCBI36, Chr 3

4225320253\_A, nprobe = 148

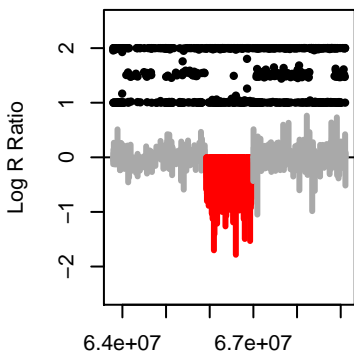

Physical Position NCBI36, Chr 6

4225320253\_A, nprobe = 15

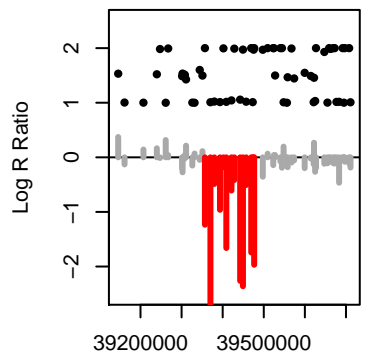

Physical Position NCBI36, Chr 8

4225320253\_A, nprobe = 48

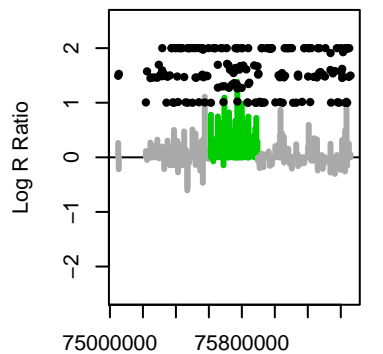

Physical Position NCBI36, Chr 17

4225320083\_A, nprobe = 26

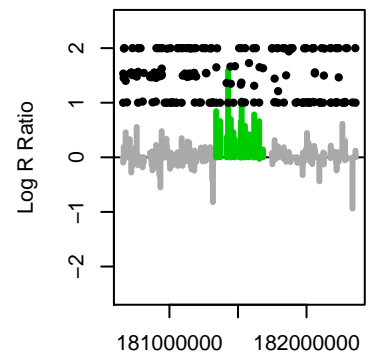

Physical Position NCBI36, Chr 3

4225320083\_A, nprobe = 16

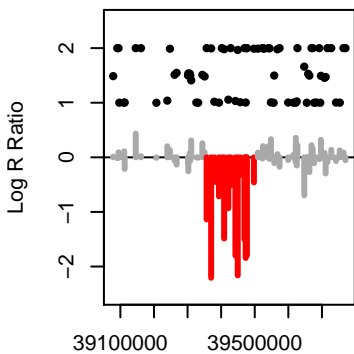

Physical Position NCBI36, Chr 8

4225320083\_A, nprobe = 13

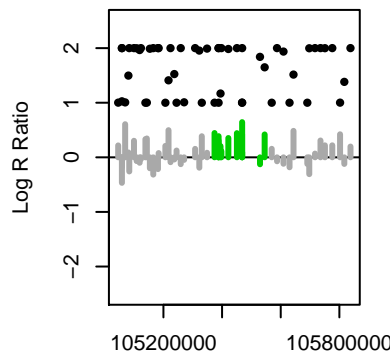

Physical Position NCBI36, Chr 14

4225320083\_A, nprobe = 45

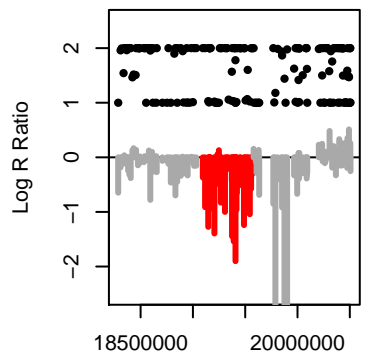

Physical Position NCBI36, Chr 15

4225320083\_A, nprobe = 8

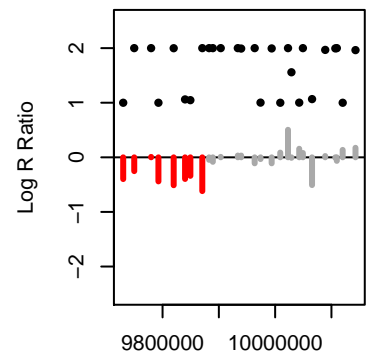

Physical Position NCBI36, Chr 21

4225320083\_A, nprobe = 39

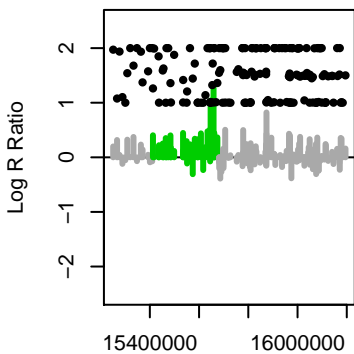

Physical Position NCBI36, Chr 22

4225320105\_B, nprobe = 10

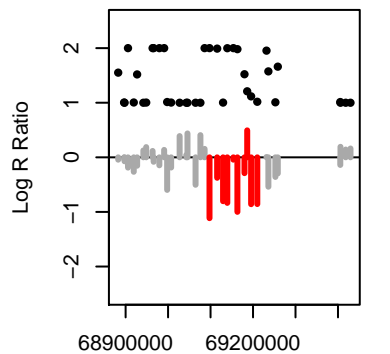

Physical Position NCBI36, Chr 4

4225320105\_B, nprobe = 16

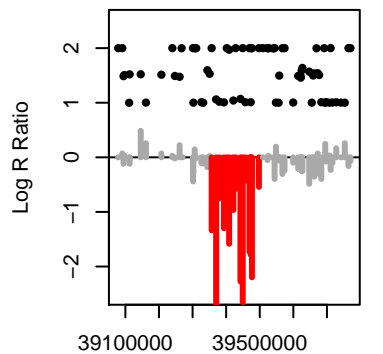

Physical Position NCBI36, Chr 8

4225320105\_B, nprobe = 45

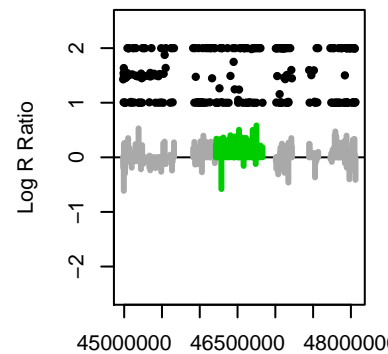

Physical Position NCBI36, Chr 10

4225320105\_B, nprobe = 44

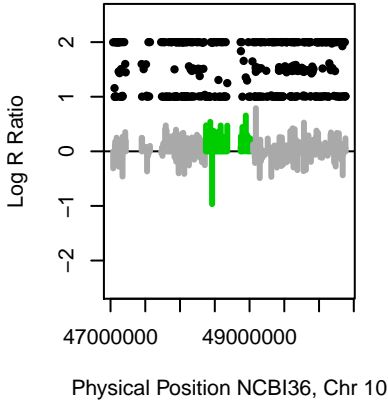

4225320105\_B, nprobe = 41

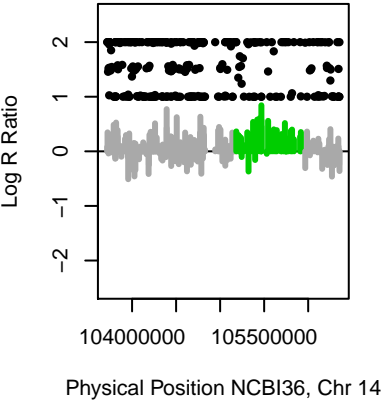

4225320105\_B, nprobe = 29

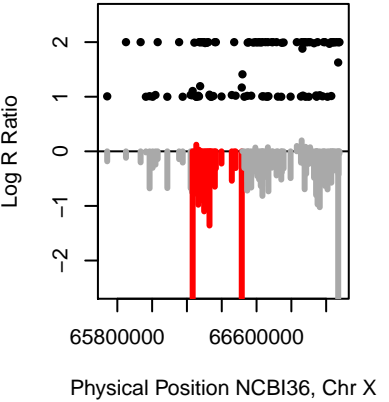

4225320105\_B, nprobe = 31

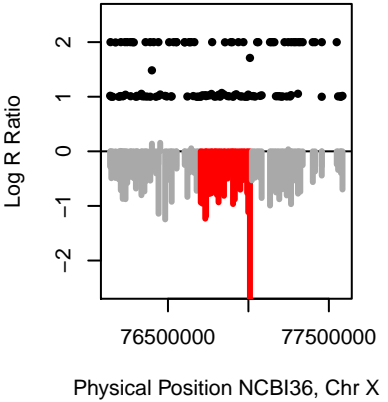

4225320384\_B, nprobe = 10

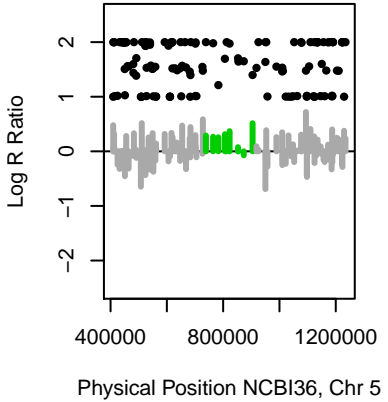

4225320384\_B, nprobe = 23

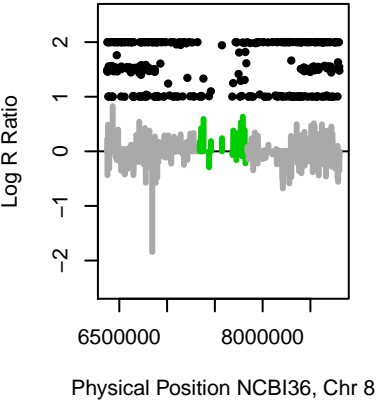

4225320384\_B, nprobe = 15

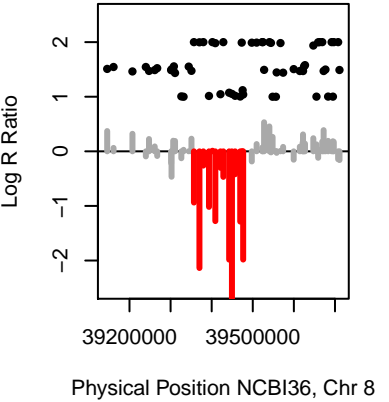

4225320384\_B, nprobe = 23

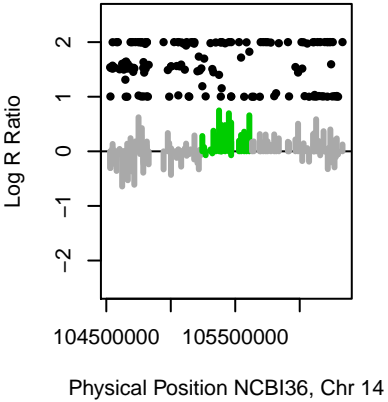

4225320384\_B, nprobe = 10

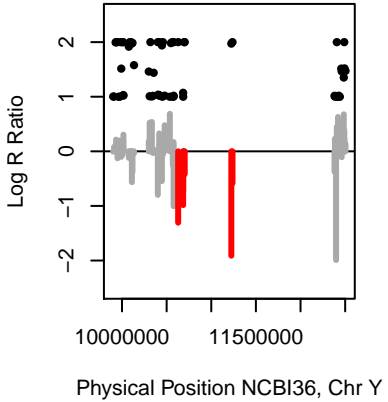

4225320384\_B, nprobe = 10

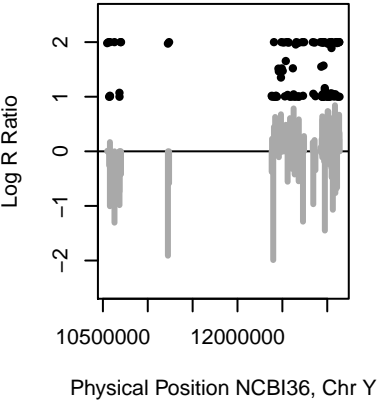

4225320105\_A, nprobe = 21

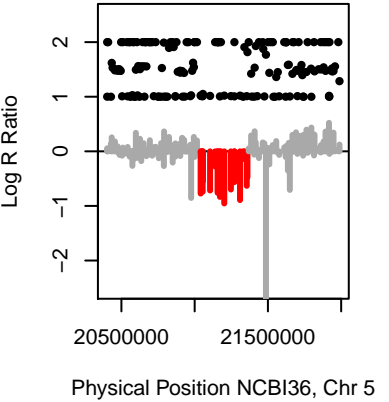

4225320105\_A, nprobe = 22

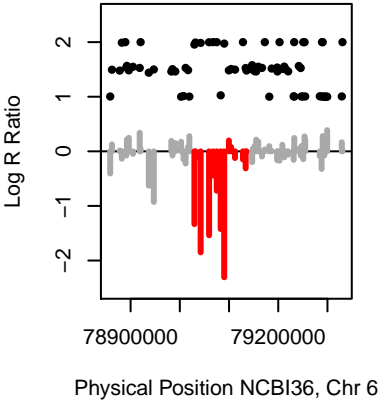

4225320105\_A, nprobe = 16

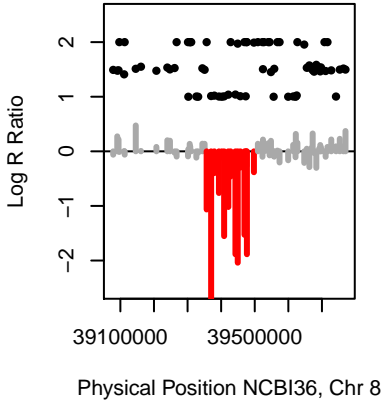

4225320105\_A, nprobe = 25

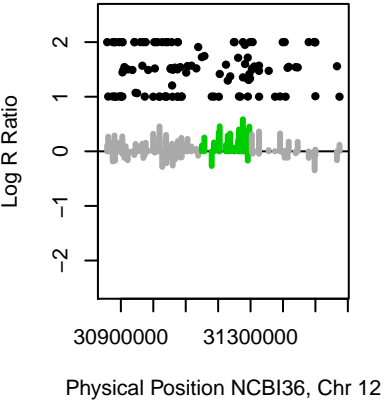

4225320105\_A, nprobe = 16

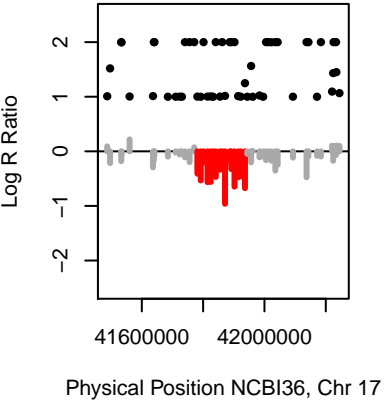

4225320105\_A, nprobe = 7

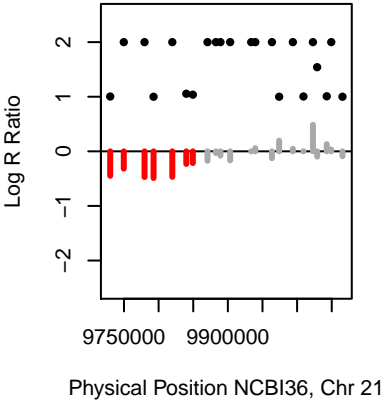



4225320363\_A, nprobe = 16

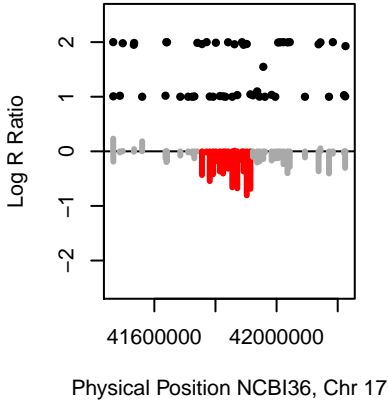

4225320363\_A, nprobe = 14

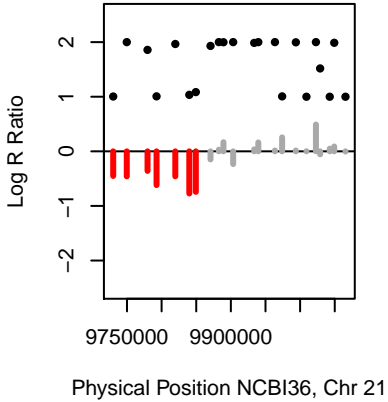

4225320363\_A, nprobe = 16

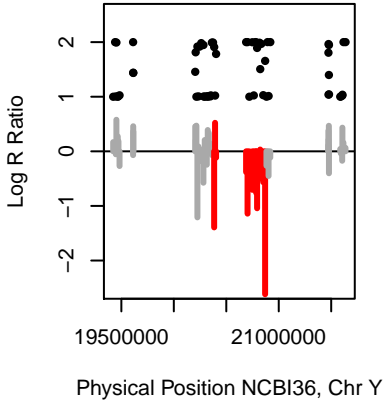

4225320363\_A, nprobe = 24

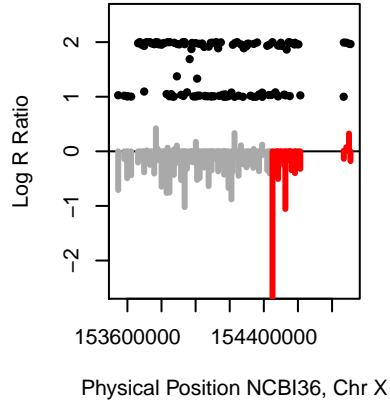

4225320769\_B, nprobe = 15

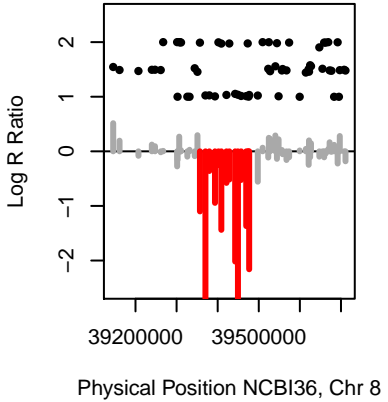

4225320769\_B, nprobe = 139

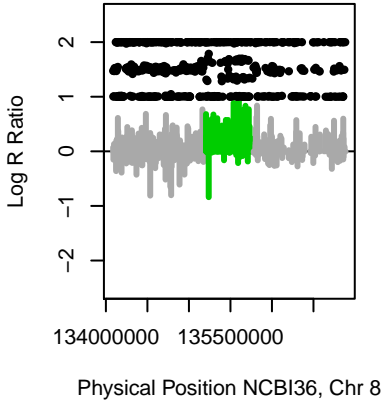

4225320769\_B, nprobe = 29

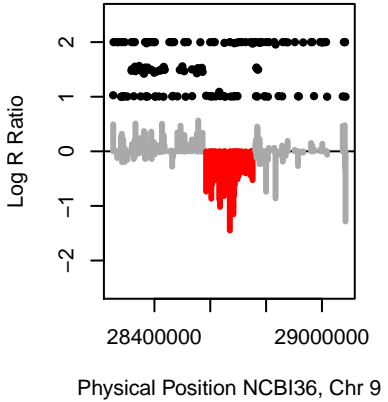

4225320769\_B, nprobe = 15

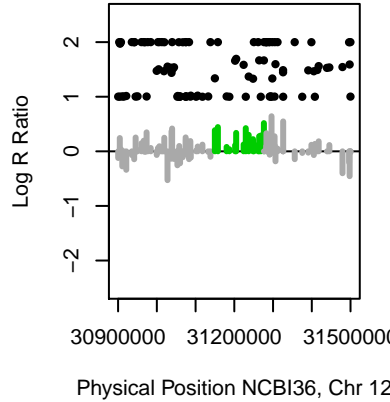

4225320769\_B, nprobe = 21

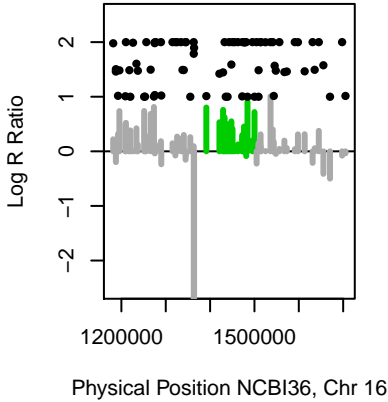

4225320769\_B, nprobe = 8

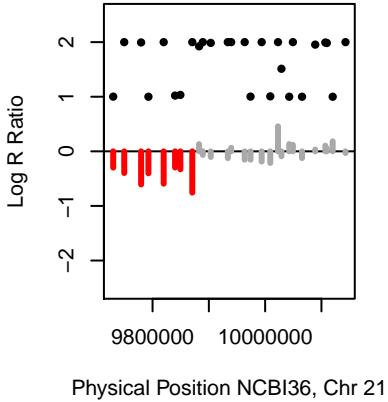

4225320769\_B, nprobe = 10

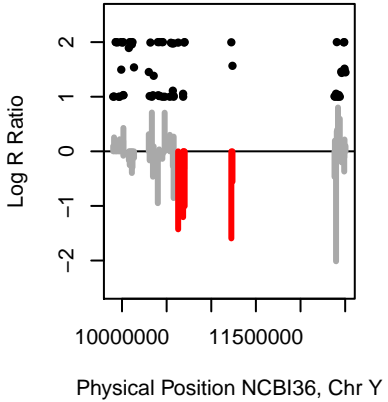

4225320769\_B, nprobe = 10

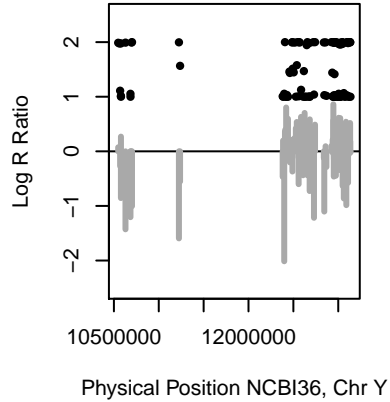

4225320257\_A, nprobe = 16

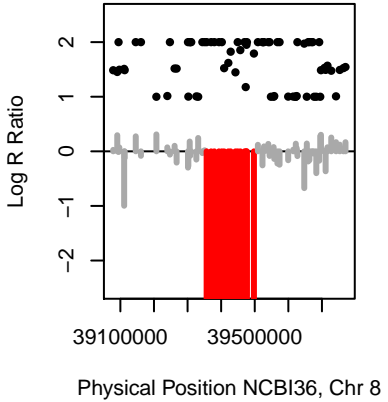

4225320257\_A, nprobe = 11

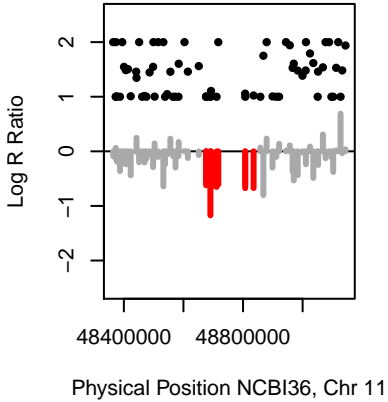

4225320257\_A, nprobe = 8

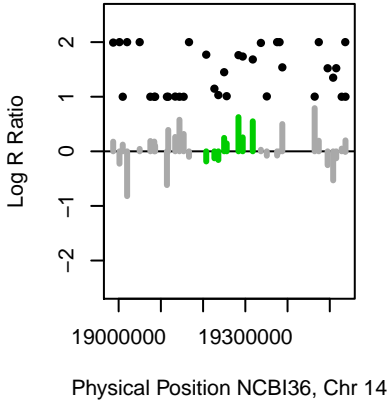

4225320257\_A, nprobe = 10

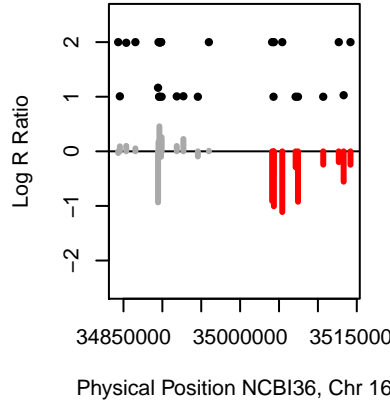



4225320257\_A, nprobe = 24

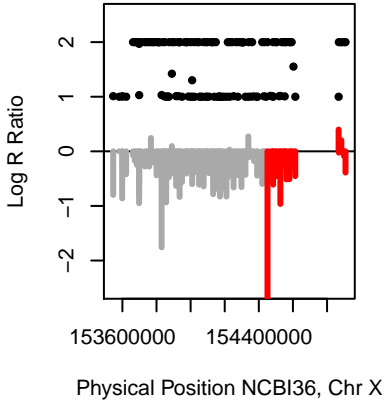

4225320321\_A, nprobe = 16

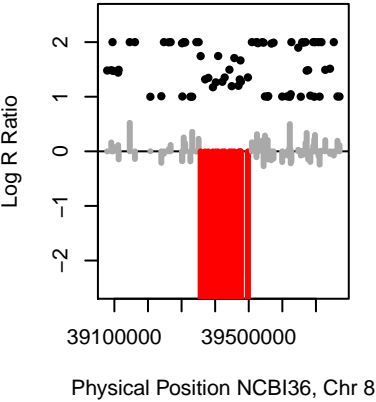

4225320321\_A, nprobe = 29

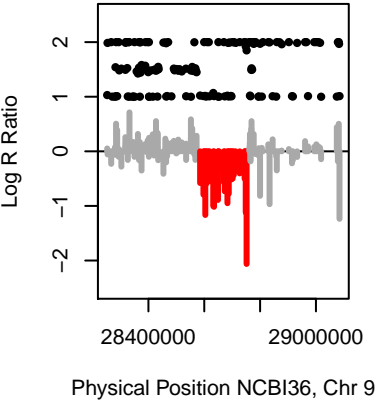

4225320321\_A, nprobe = 10

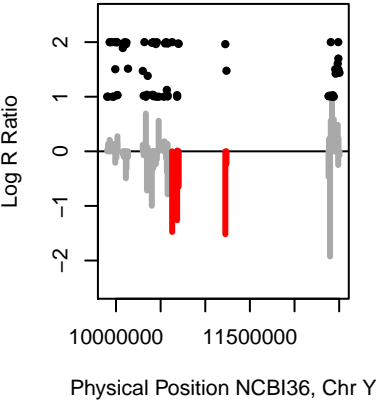

4225320321\_A, nprobe = 10

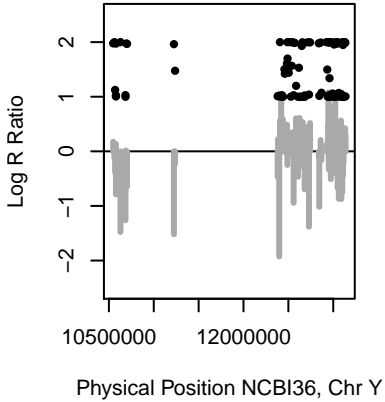

4225320072\_B, nprobe = 16

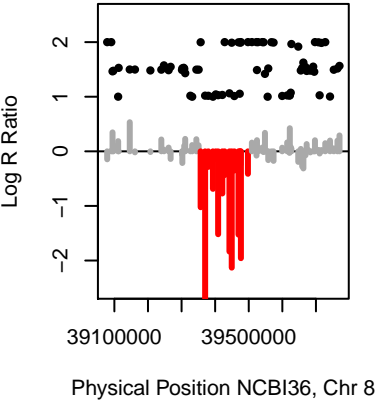

4225320072\_B, nprobe = 25

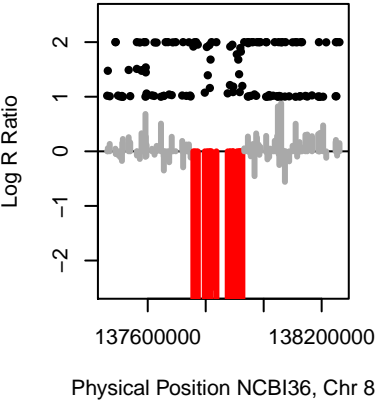

4225320072\_B, nprobe = 53

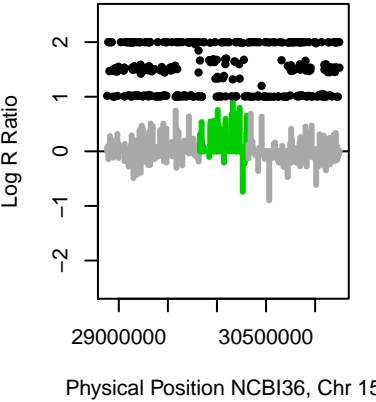

4225320072\_B, nprobe = 24

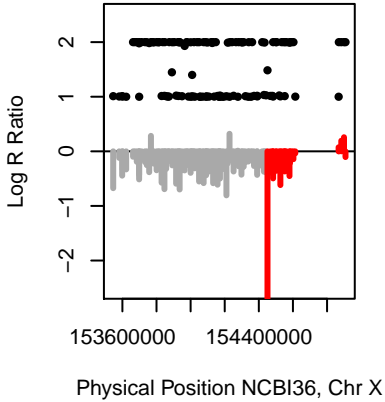

4225320206\_A, nprobe = 16

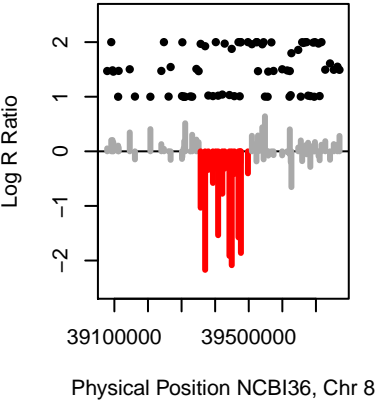

4225320206\_B, nprobe = 16

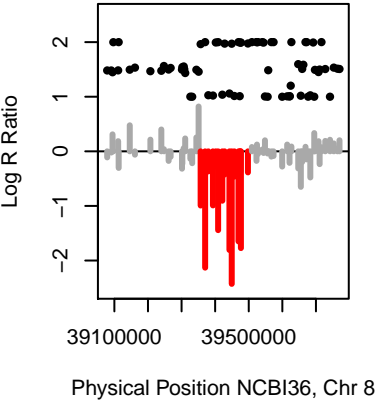

4225320206\_B, nprobe = 8

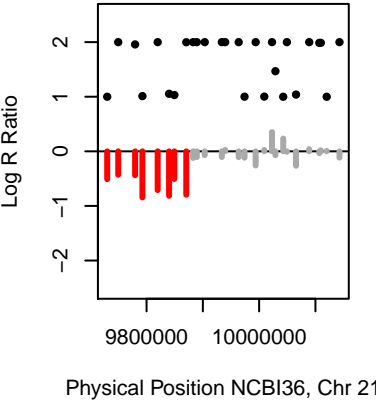

4225320239\_B, nprobe = 16

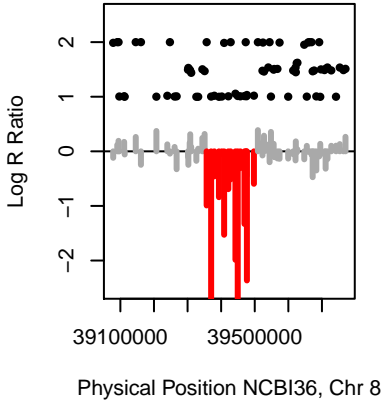

4225320239\_B, nprobe = 30

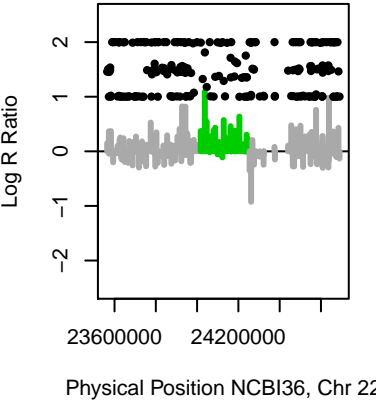

4225320480\_A, nprobe = 16

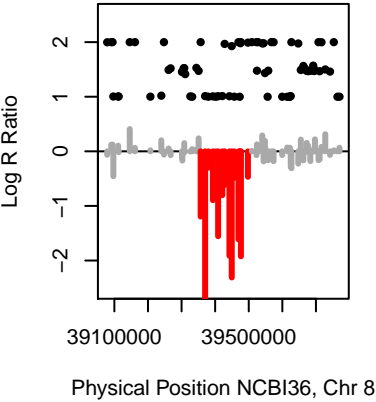

4225320480\_A, nprobe = 12

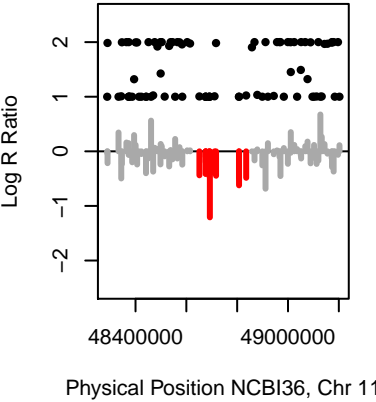

4225320480\_A, nprobe = 8

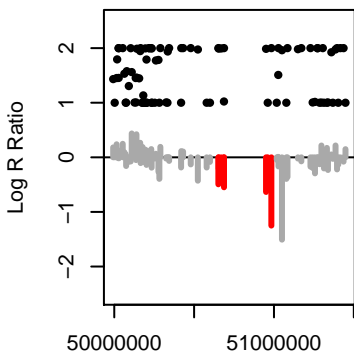

Physical Position NCBI36, Chr 11

4225320480\_A, nprobe = 15

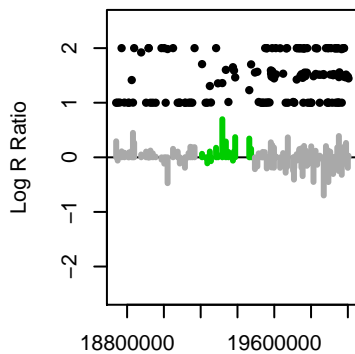

Physical Position NCBI36, Chr 14

4225320480\_A, nprobe = 13

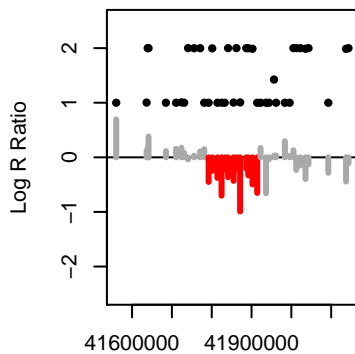

Physical Position NCBI36, Chr 17

4225320480\_A, nprobe = 8

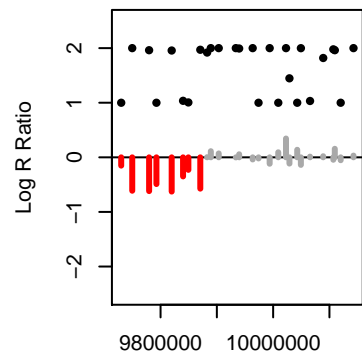

Physical Position NCBI36, Chr 21

4225320480\_A, nprobe = 9

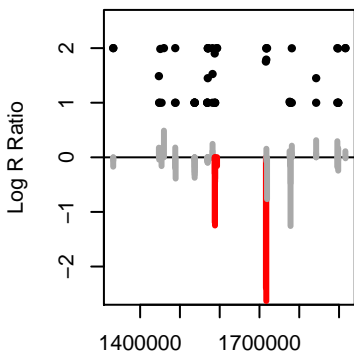

Physical Position NCBI36, Chr X

4225320480\_A, nprobe = 10

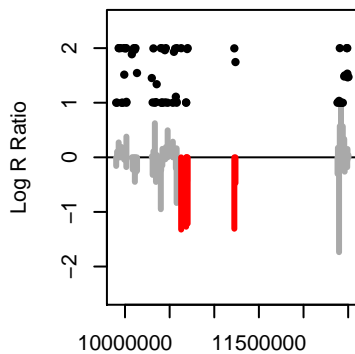

Physical Position NCBI36, Chr Y

4225320480\_A, nprobe = 10

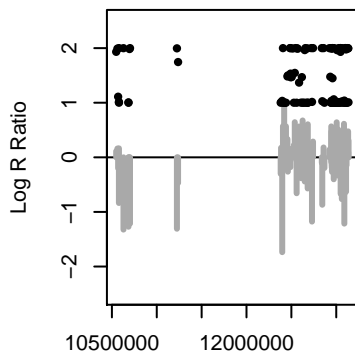

Physical Position NCBI36, Chr Y

4225320565\_B, nprobe = 16

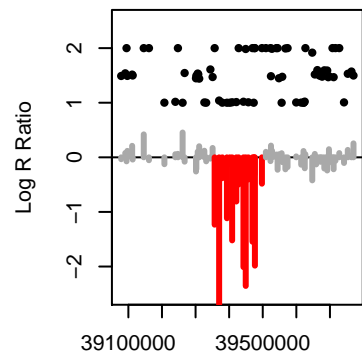

Physical Position NCBI36, Chr 8

4225320565\_B, nprobe = 24

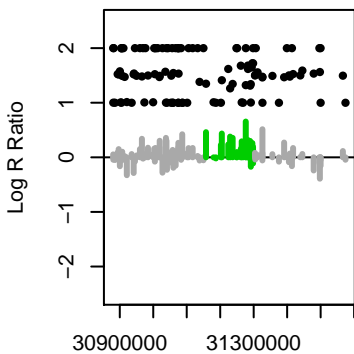

Physical Position NCBI36, Chr 12

4225320565\_B, nprobe = 10

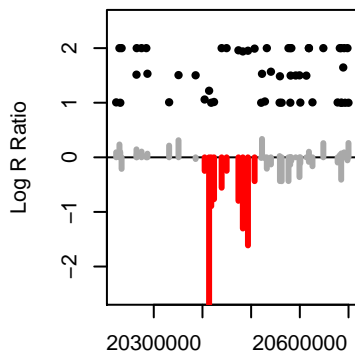

Physical Position NCBI36, Chr 19

4225320565\_B, nprobe = 11

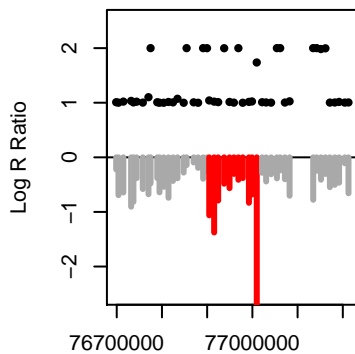

Physical Position NCBI36, Chr X

4225320565\_B, nprobe = 24

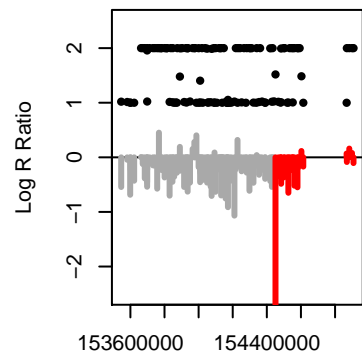

Physical Position NCBI36, Chr X

4225320567\_B, nprobe = 16

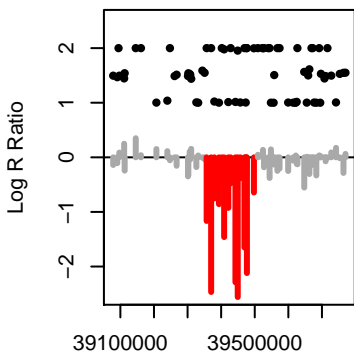

Physical Position NCBI36, Chr 8

4225320567\_B, nprobe = 24

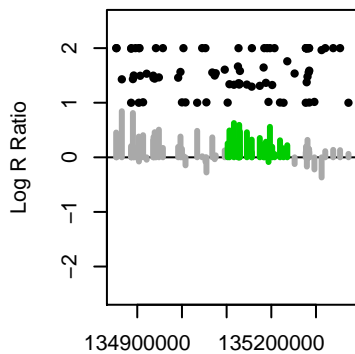

Physical Position NCBI36, Chr 10

4225320567\_B, nprobe = 22

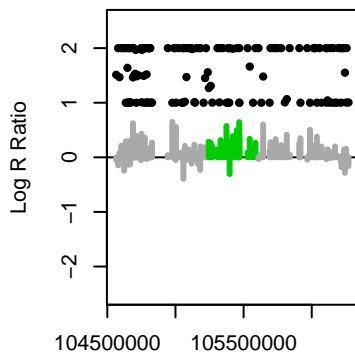

Physical Position NCBI36, Chr 14

4225320819\_A, nprobe = 16

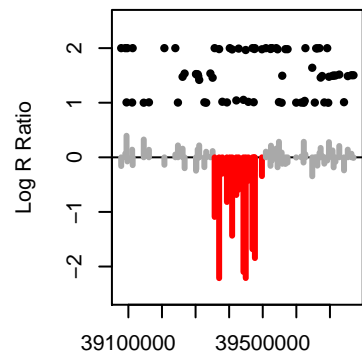

Physical Position NCBI36, Chr 8

4225320819\_A, nprobe = 10

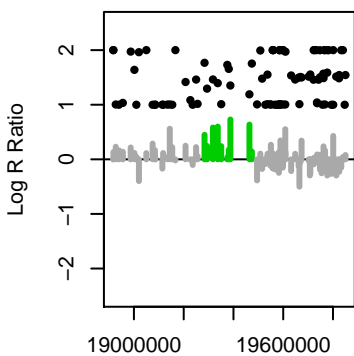

Physical Position NCBI36, Chr 14

4225320819\_A, nprobe = 13

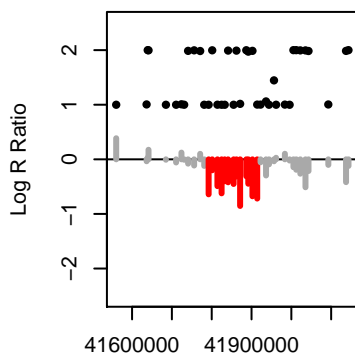

Physical Position NCBI36, Chr 17

4225320400\_A, nprobe = 31

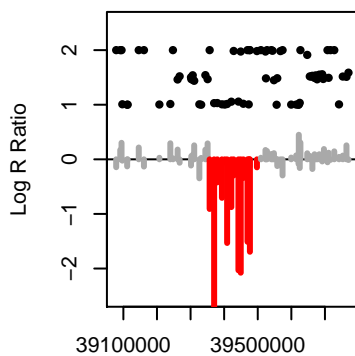

Physical Position NCBI36, Chr 8

4225320400\_A, nprobe = 10

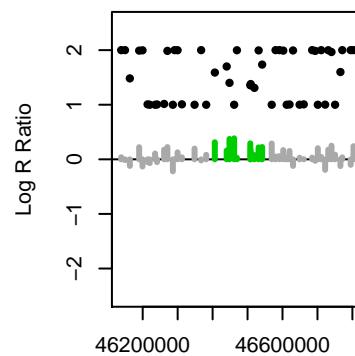

Physical Position NCBI36, Chr 10

4225320400\_A, nprobe = 12

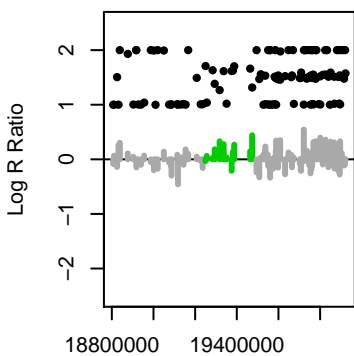

Physical Position NCBI36, Chr 14

4225320400\_A, nprobe = 35

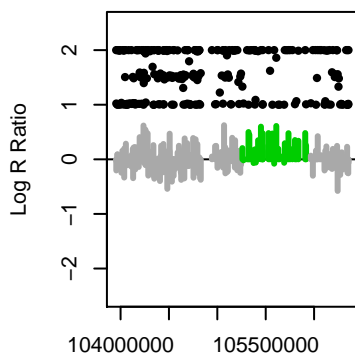

Physical Position NCBI36, Chr 14

4225320400\_A, nprobe = 10

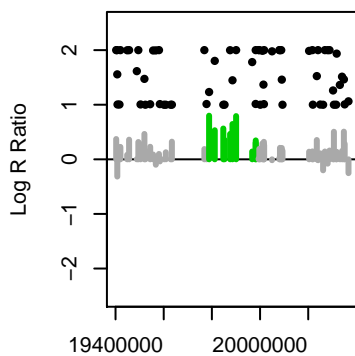

Physical Position NCBI36, Chr 15

4225320400\_A, nprobe = 20

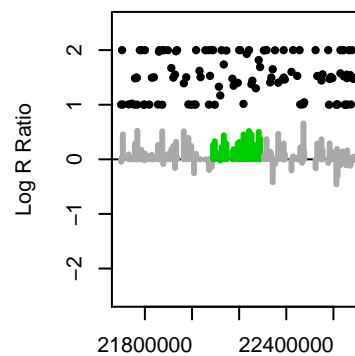

Physical Position NCBI36, Chr 15

4225320400\_A, nprobe = 22

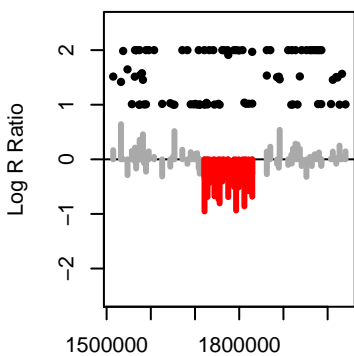

Physical Position NCBI36, Chr 18

4225320273\_A, nprobe = 32

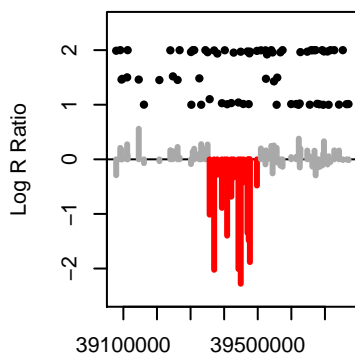

Physical Position NCBI36, Chr 8

4225320273\_A, nprobe = 22

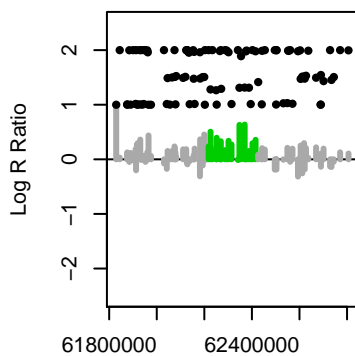

Physical Position NCBI36, Chr 12

4225320273\_A, nprobe = 7

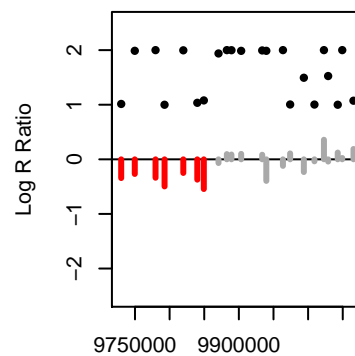

Physical Position NCBI36, Chr 21

4225320131\_B, nprobe = 11

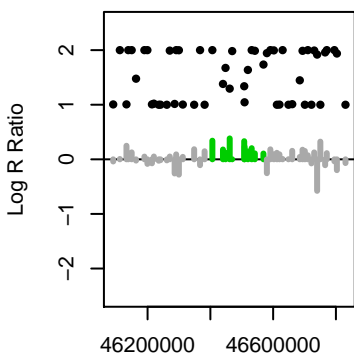

Physical Position NCBI36, Chr 10

4225320131\_B, nprobe = 39

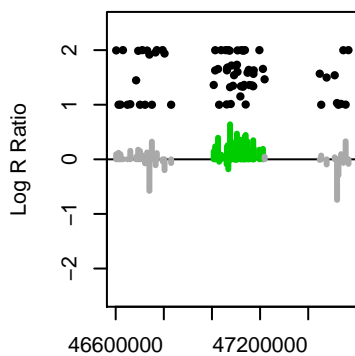

Physical Position NCBI36, Chr 10

4225320131\_B, nprobe = 7

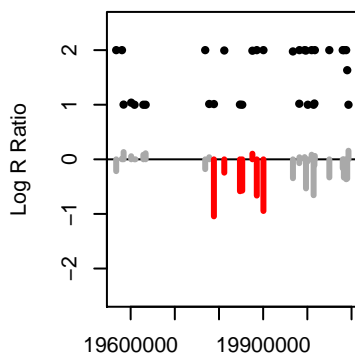

Physical Position NCBI36, Chr 15

4225320131\_B, nprobe = 24

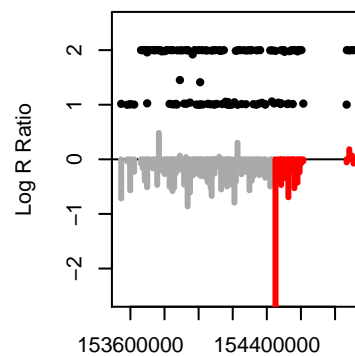

Physical Position NCBI36, Chr X

4225320205\_A, nprobe = 28

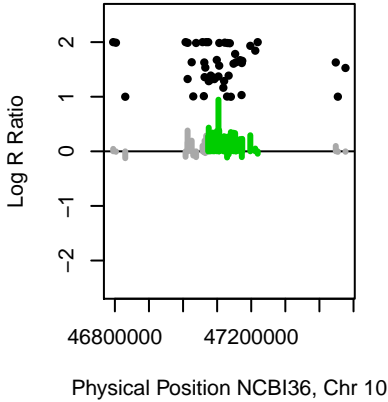

4225320205\_A, nprobe = 35

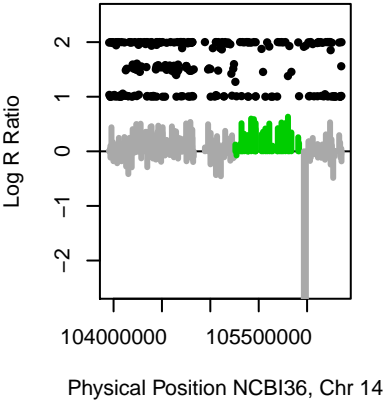

4225320205\_A, nprobe = 10

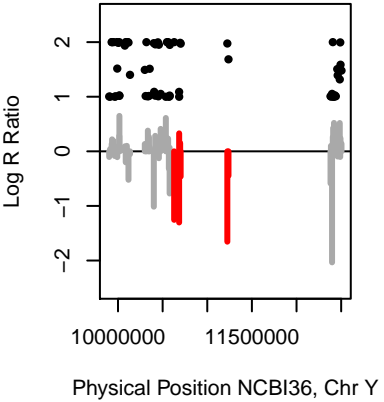

4225320205\_A, nprobe = 10

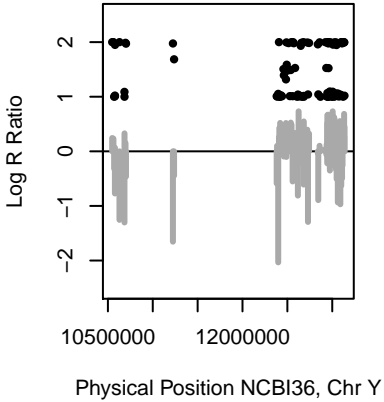

4225320205\_A, nprobe = 24

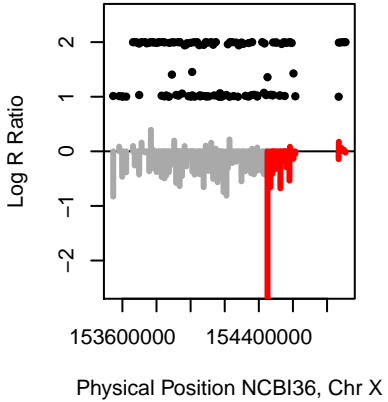

4225320565\_A, nprobe = 25

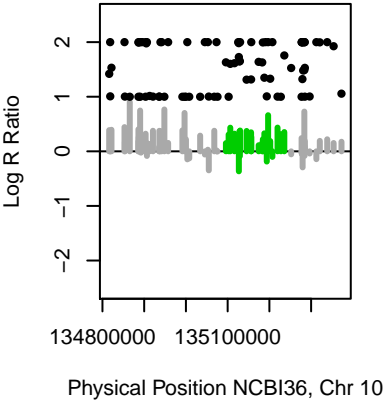

4225320565\_A, nprobe = 11

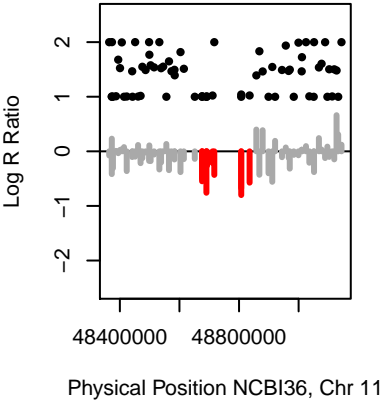

4225320565\_A, nprobe = 17

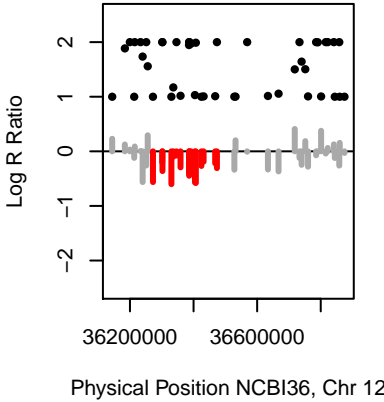

4225320565\_A, nprobe = 20

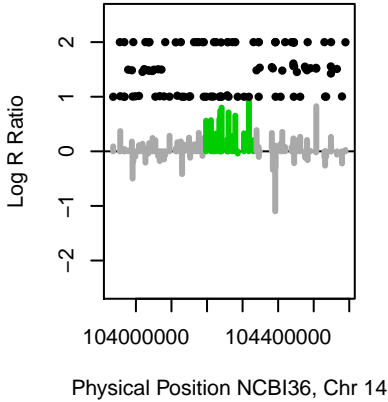

4225320565\_A, nprobe = 13

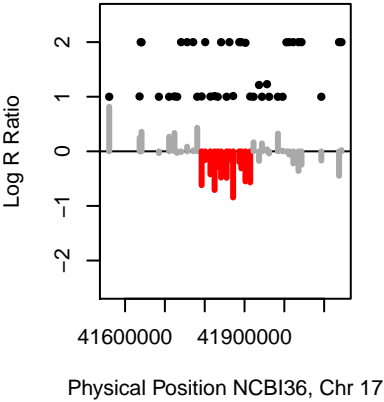

4225320565\_A, nprobe = 24

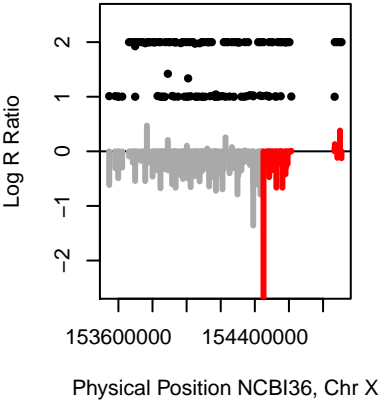

4225320769\_A, nprobe = 12

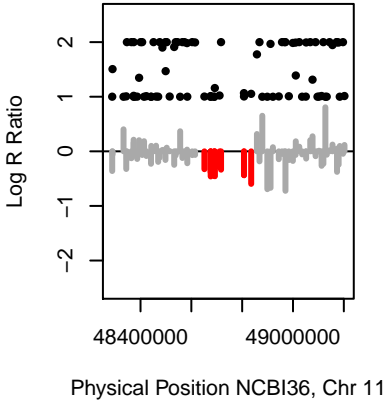

4225320769\_A, nprobe = 11

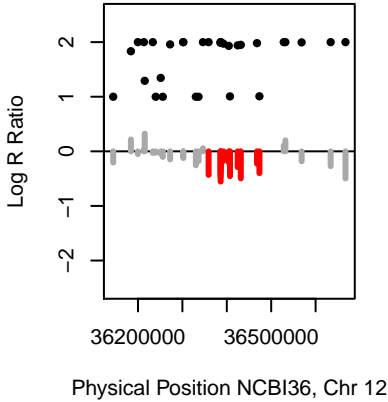

4225320769\_A, nprobe = 10

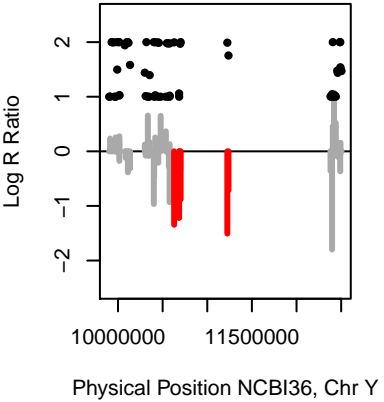

4225320769\_A, nprobe = 10

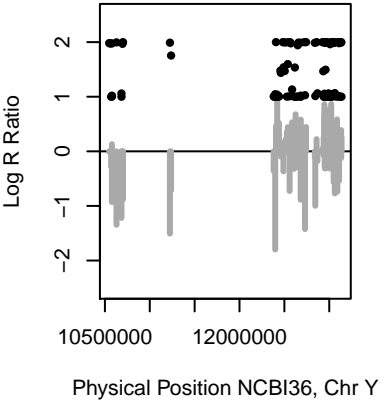

4225320253\_B, nprobe = 10

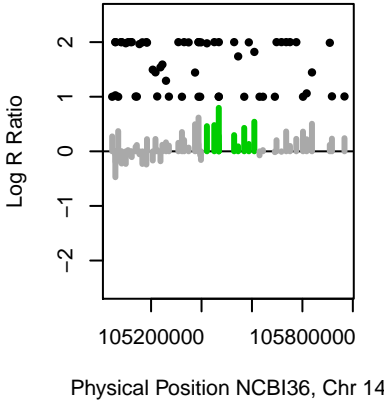

4225320253\_B, nprobe = 19

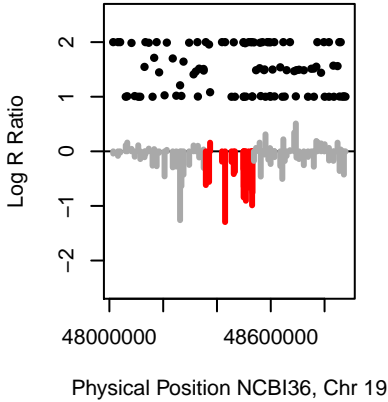

4225320819\_B, nprobe = 10

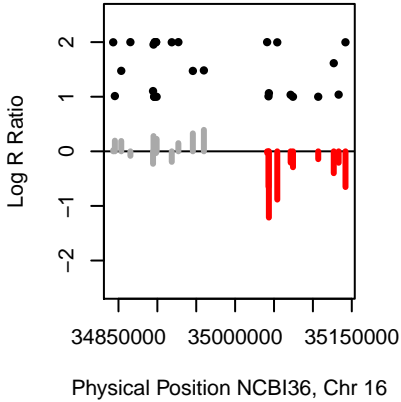

4225320819\_B, nprobe = 8

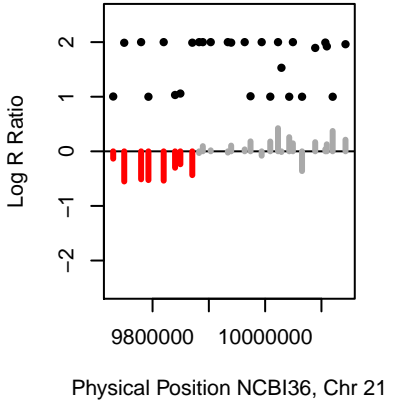

4225320135\_B, nprobe = 13

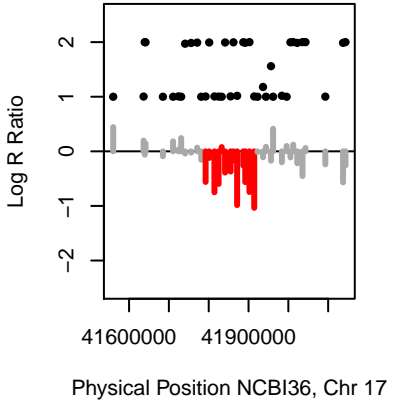

4225320135\_B, nprobe = 24

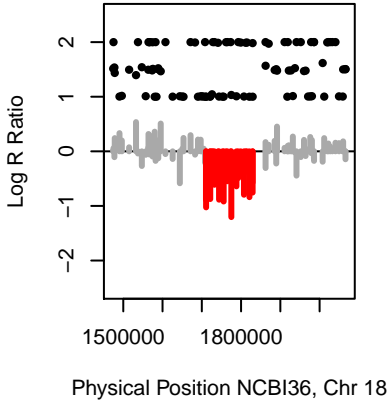

4225320135\_B, nprobe = 34

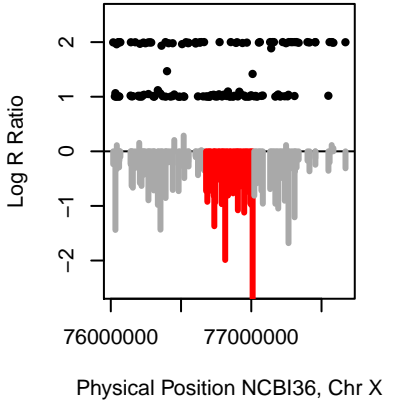

4225320135\_B, nprobe = 16

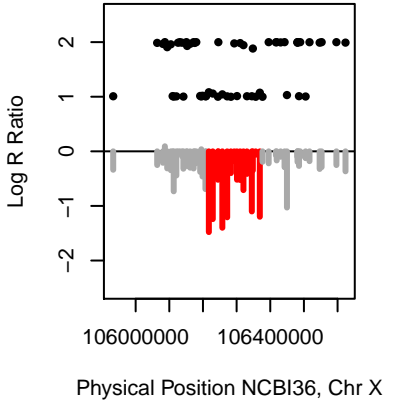

4225320135\_B, nprobe = 24

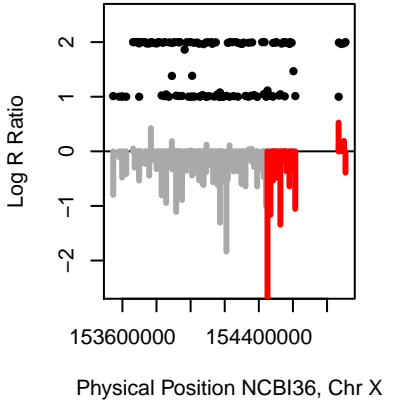

4225320083\_B, nprobe = 8

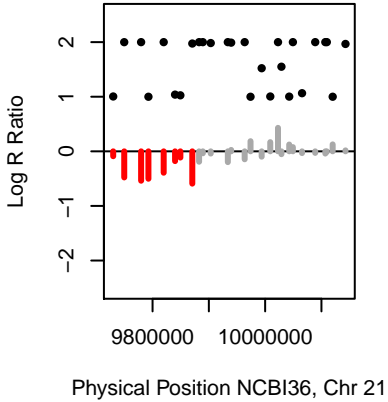

4225320083\_B, nprobe = 24

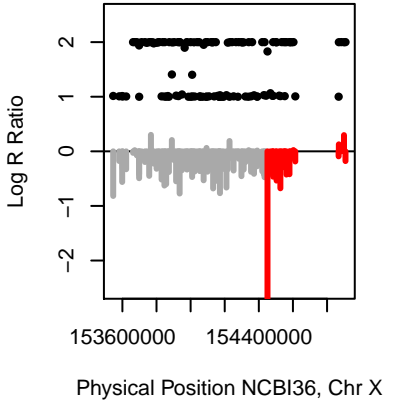

4225320272\_B, nprobe = 8

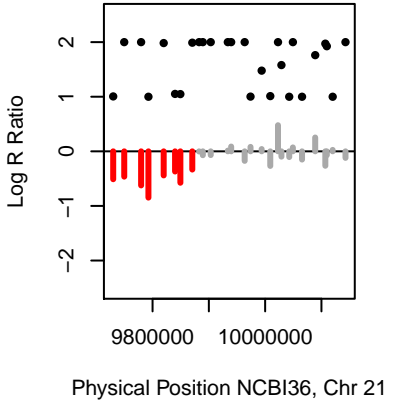

4225320272\_B, nprobe = 10

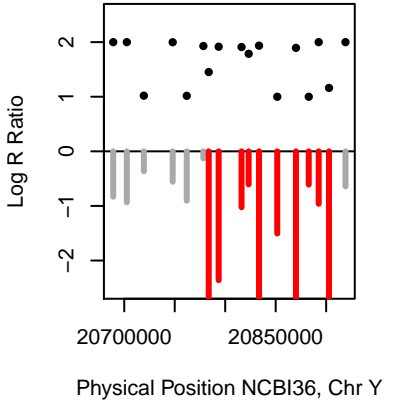

4225320272\_B, nprobe = 24

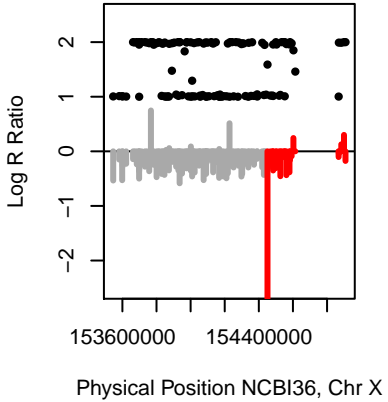

4225320232\_A, nprobe = 21

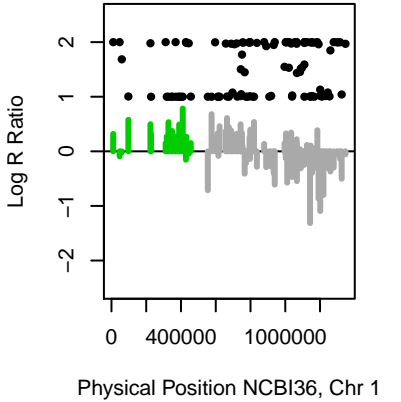

4225320232\_A, nprobe = 38

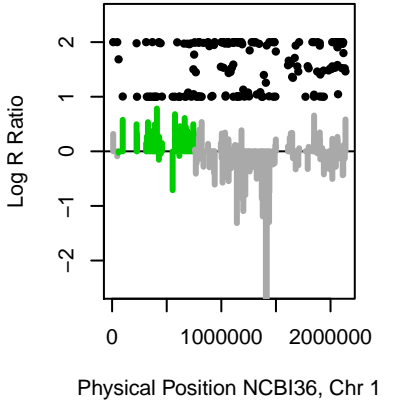

4225320232\_A, nprobe = 32

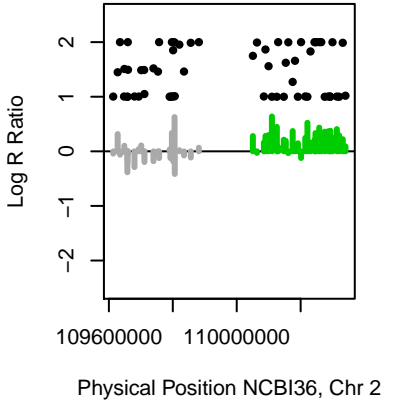

4225320232\_A, nprobe = 10

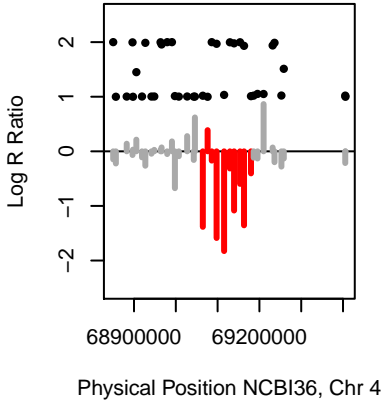

4225320232\_A, nprobe = 153

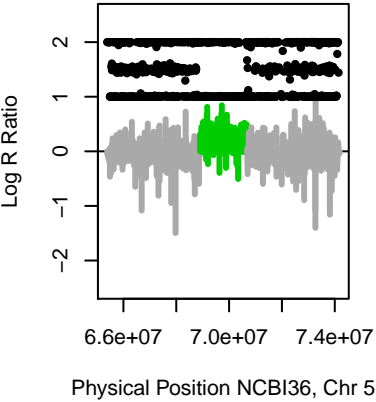

4225320232\_A, nprobe = 48

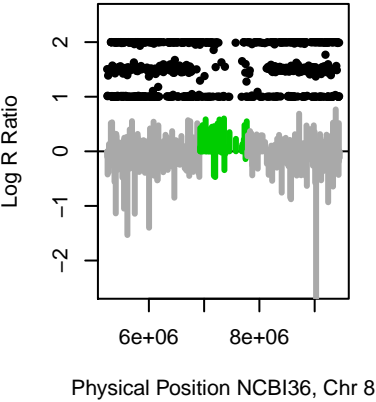

4225320232\_A, nprobe = 19

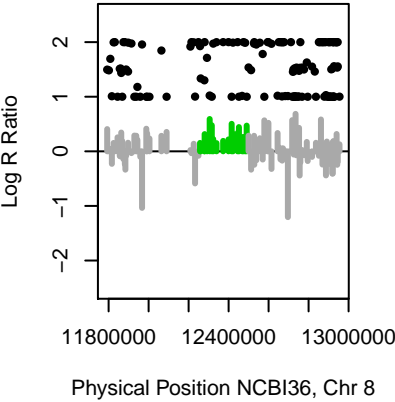

4225320232\_A, nprobe = 16

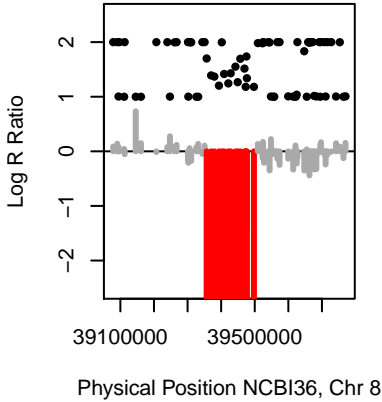

4225320232\_A, nprobe = 10

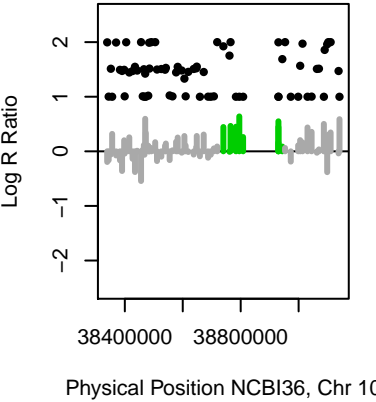

4225320232\_A, nprobe = 33

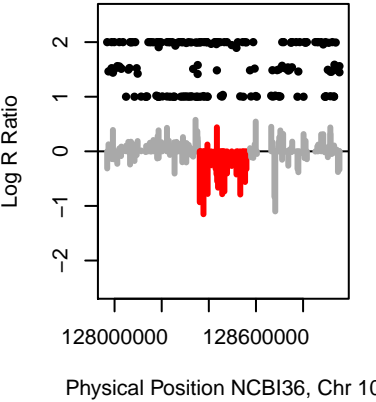

4225320232\_A, nprobe = 22

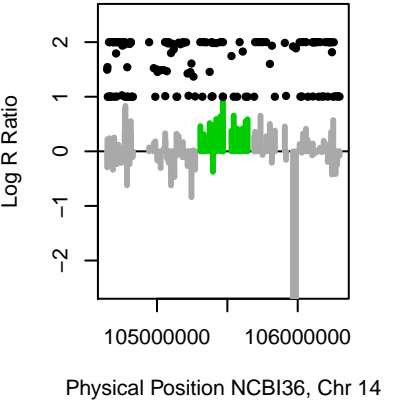

4225320232\_A, nprobe = 92

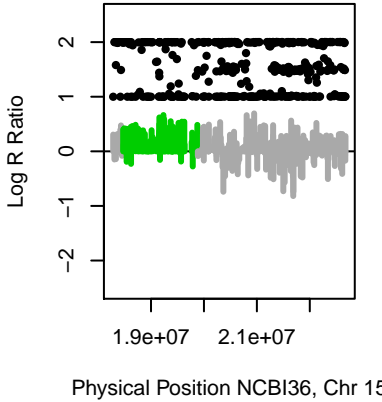

4225320232\_A, nprobe = 9

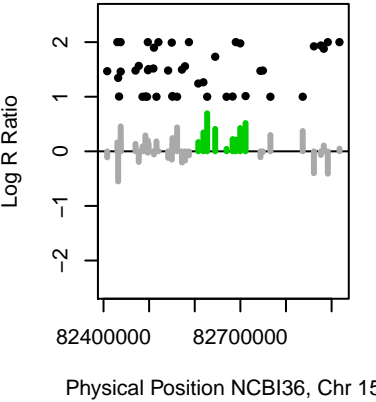

4225320232\_A, nprobe = 414

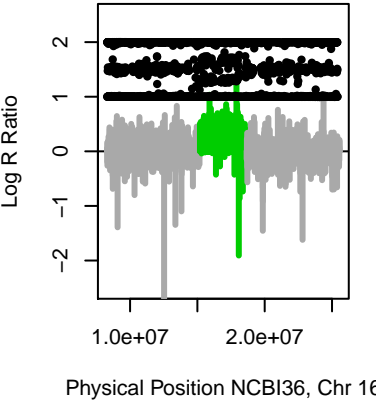

4225320232\_A, nprobe = 67

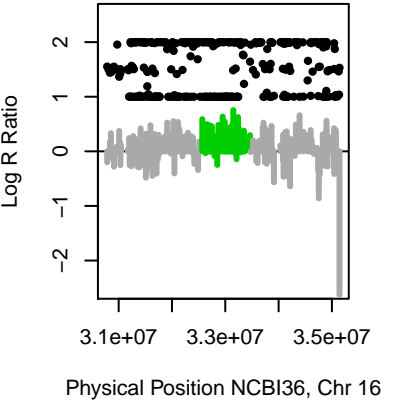

4225320232\_A, nprobe = 17

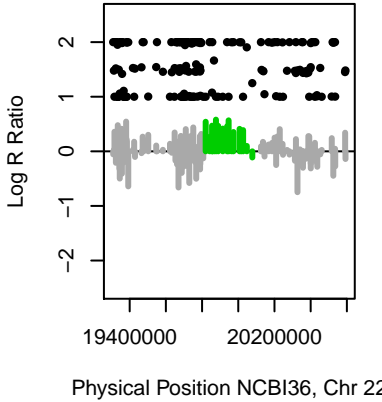

4220473380\_A, nprobe = 38

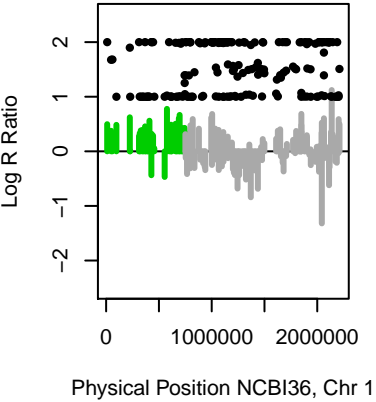

4220473380\_A, nprobe = 20

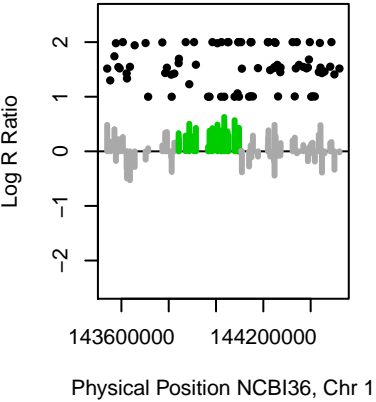

4220473380\_A, nprobe = 32

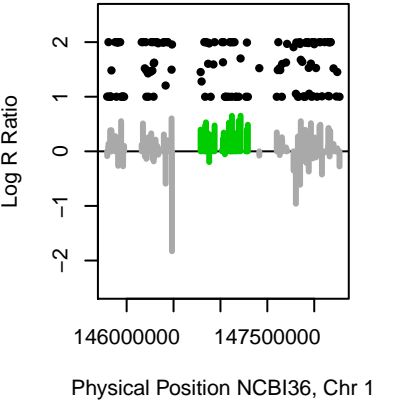

4220473380\_A, nprobe = 22

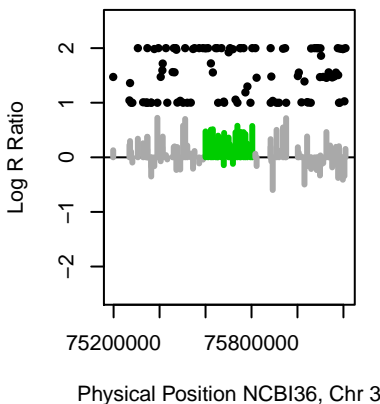

4220473380\_A, nprobe = 24

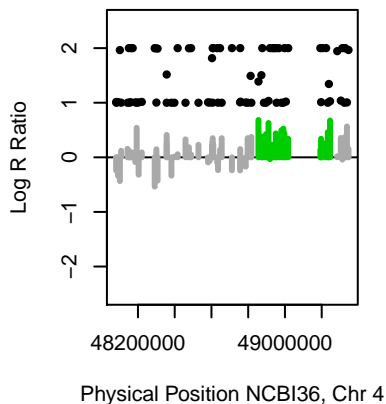

4220473380\_A, nprobe = 16

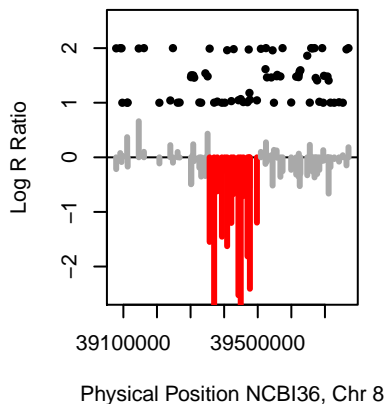

4220473380\_A, nprobe = 9

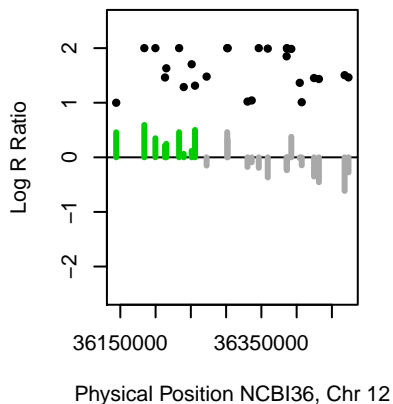

4220473380\_A, nprobe = 61

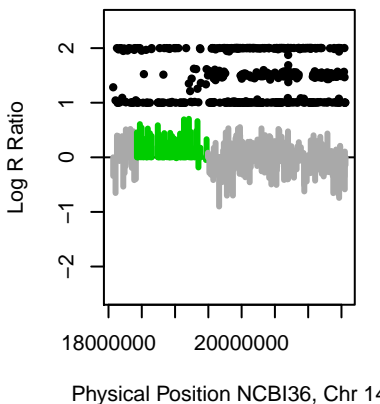

4220473380\_A, nprobe = 26

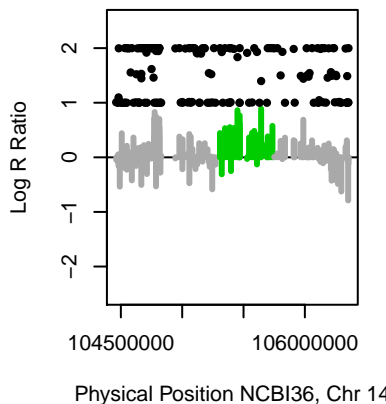

4220473380\_A, nprobe = 105

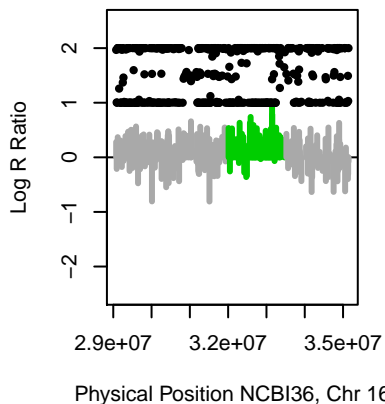

4220473380\_A, nprobe = 31

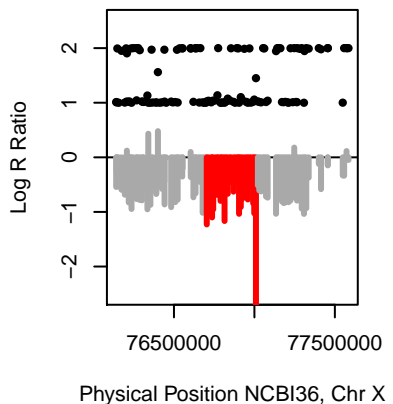

4225320561\_B, nprobe = 41

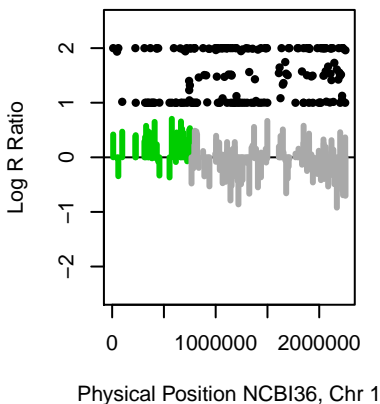

4225320561\_B, nprobe = 26

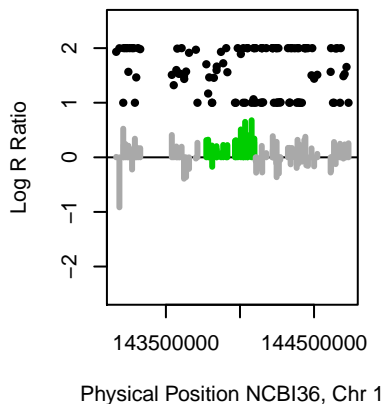

4225320561\_B, nprobe = 41

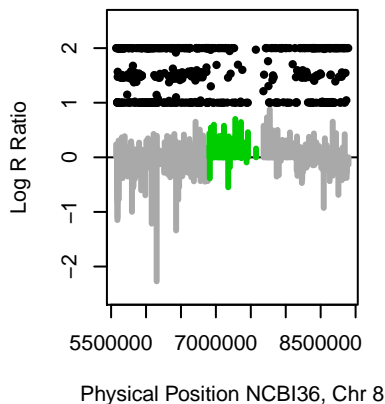

4225320561\_B, nprobe = 29

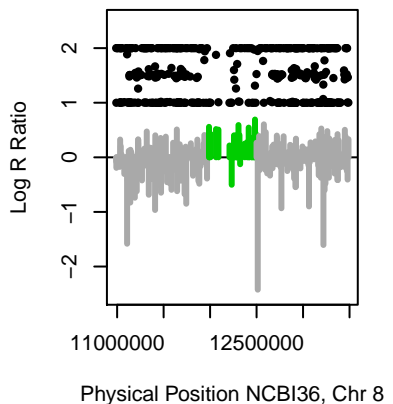

4225320561\_B, nprobe = 16

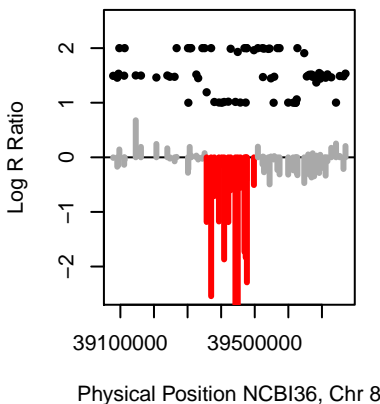

4225320561\_B, nprobe = 25

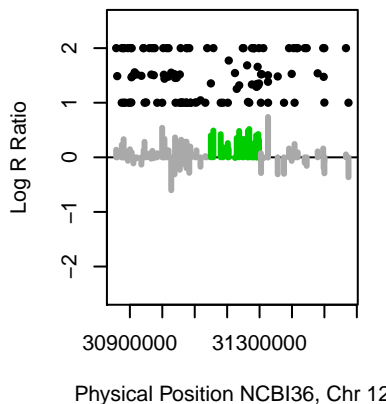

4225320561\_B, nprobe = 9

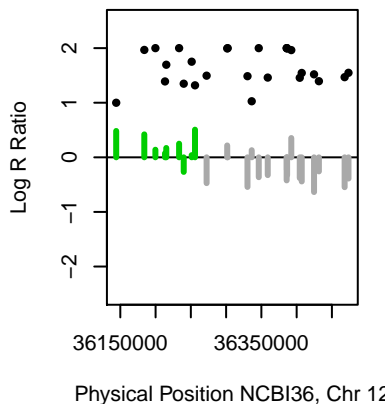

4225320561\_B, nprobe = 25

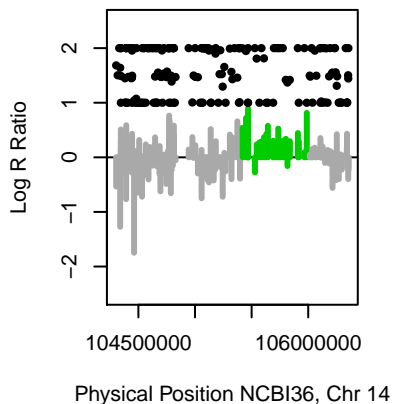

4225320561\_B, nprobe = 31

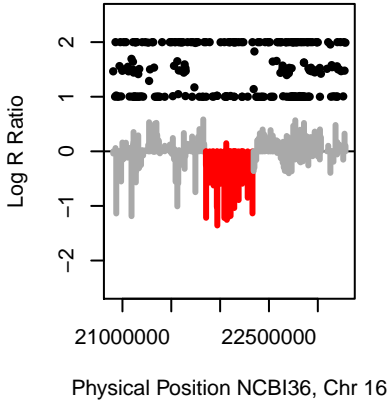

4225320561\_B, nprobe = 52

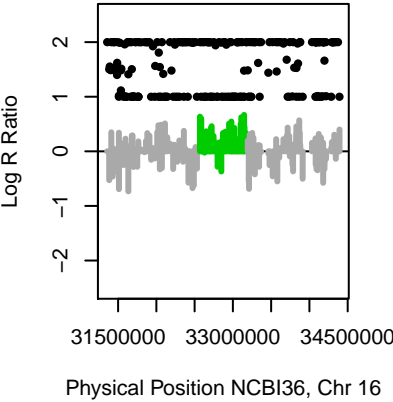

4225320561\_B, nprobe = 36

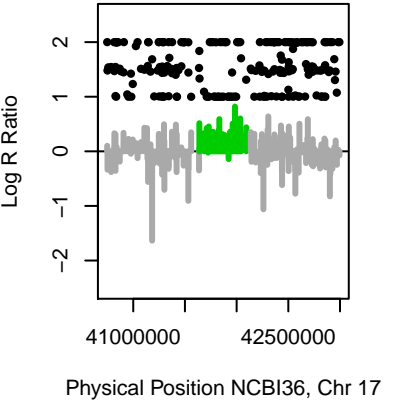

4225320561\_B, nprobe = 31

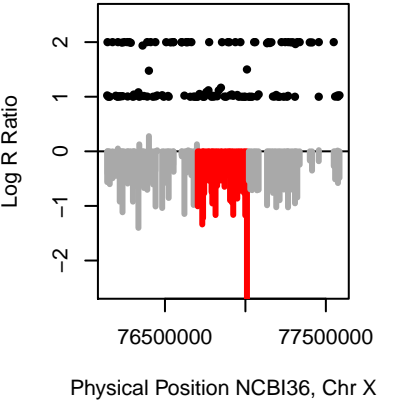

4225320561\_B, nprobe = 24

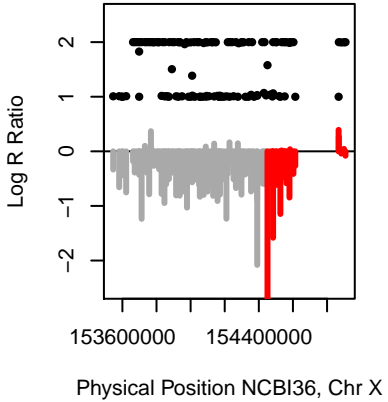

4225320636\_B, nprobe = 16

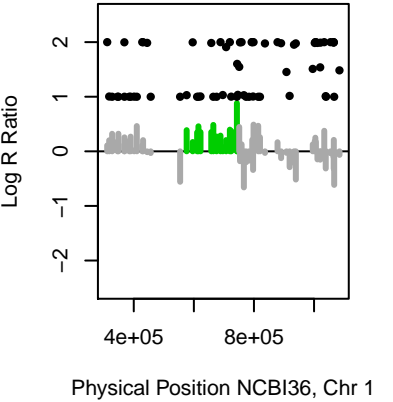

4225320636\_B, nprobe = 89

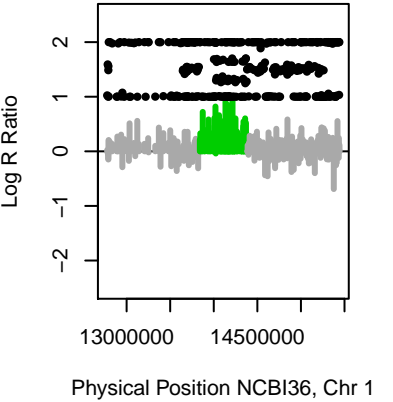

4225320636\_B, nprobe = 5

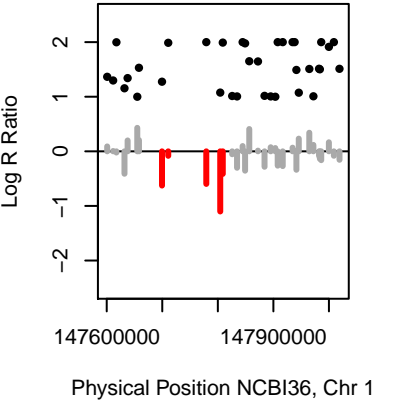

4225320636\_B, nprobe = 56

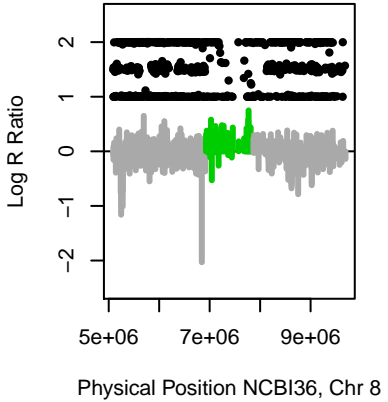

4225320636\_B, nprobe = 102

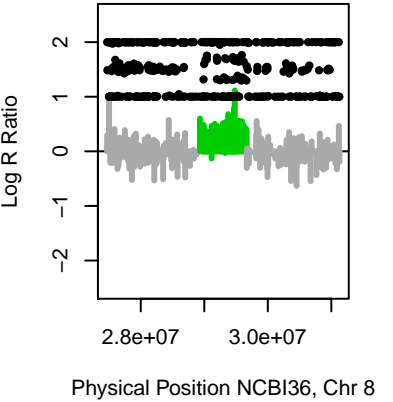

4225320636\_B, nprobe = 16

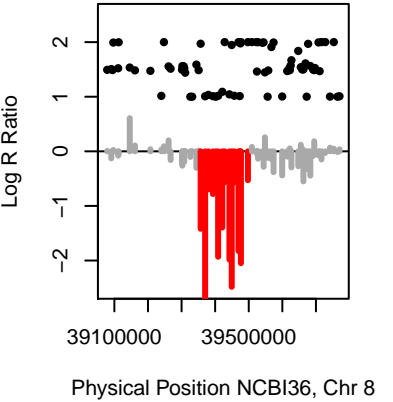

4225320636\_B, nprobe = 31

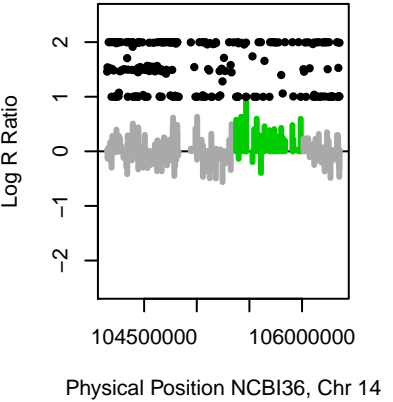

4225320636\_B, nprobe = 14

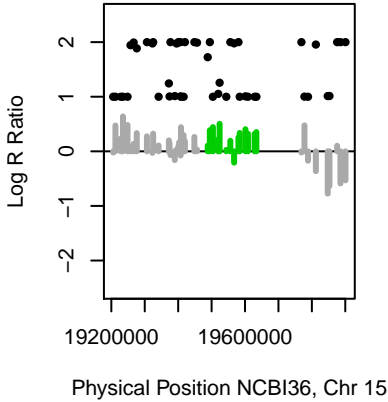

4225320636\_B, nprobe = 19

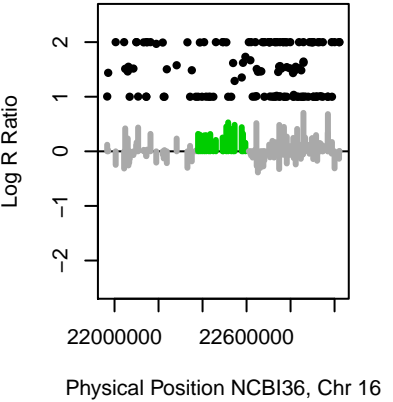

4225320636\_B, nprobe = 8

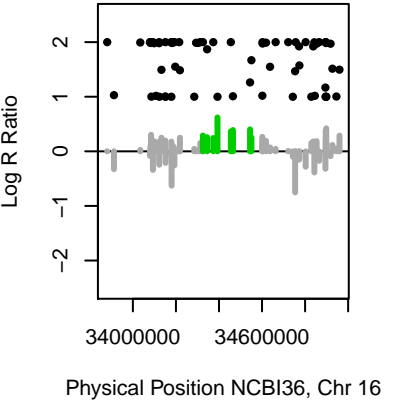

4225320636\_B, nprobe = 34

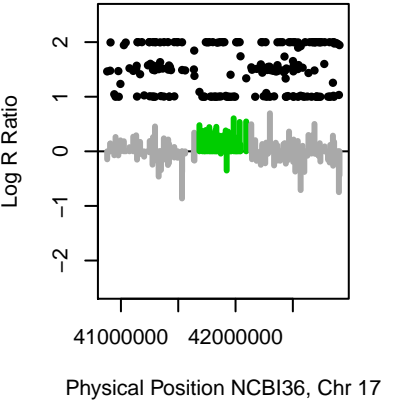



Physical Position NCBI36, Chr 5

4225320243\_A, nprobe = 16

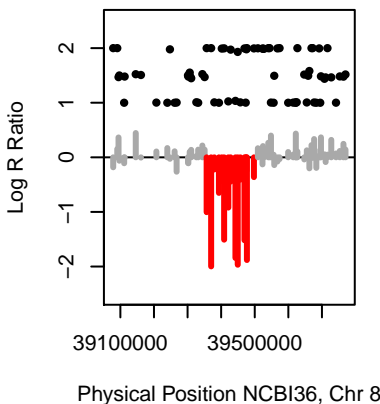

4225320243\_A, nprobe = 10

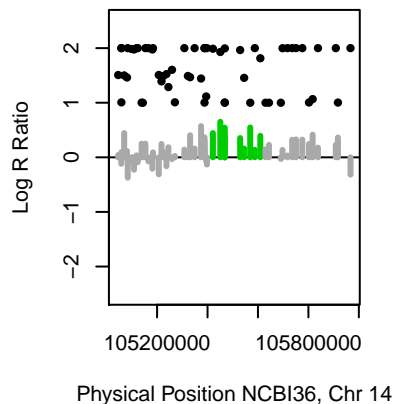

4225320243\_A, nprobe = 20

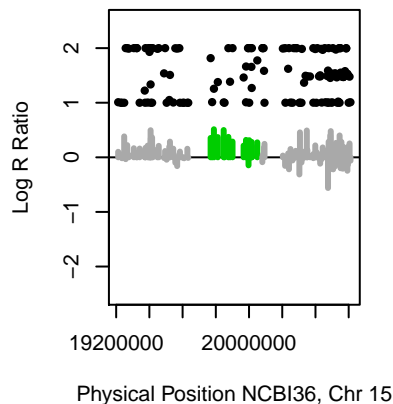

4225320243\_A, nprobe = 8

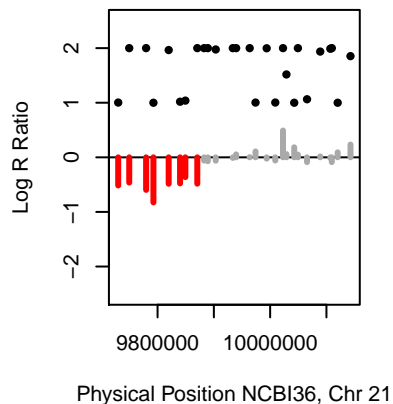

4225320243\_A, nprobe = 24

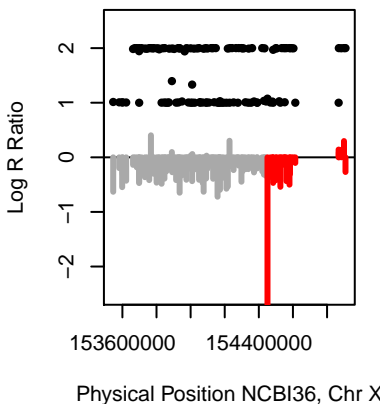

4225320145\_A, nprobe = 21

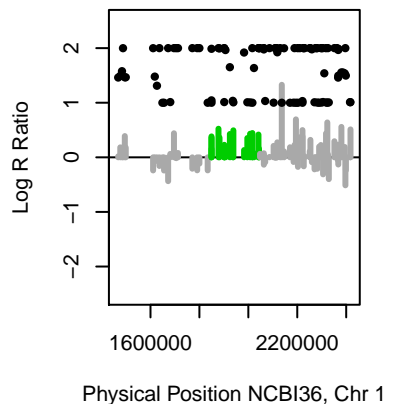

4225320145\_A, nprobe = 19

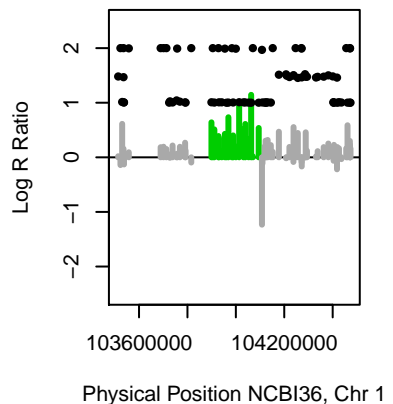

4225320145\_A, nprobe = 10

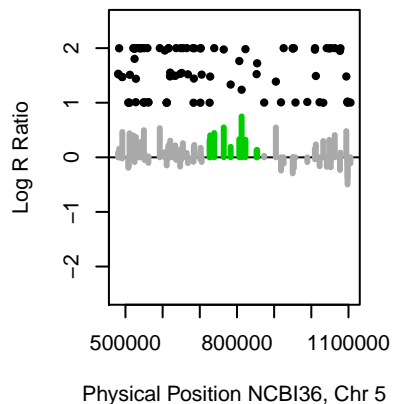

4225320145\_A, nprobe = 16

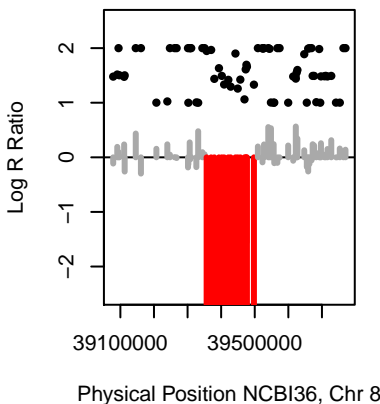

4225320145\_A, nprobe = 20

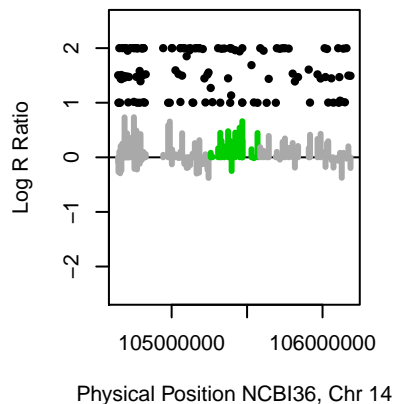

4225320145\_A, nprobe = 19

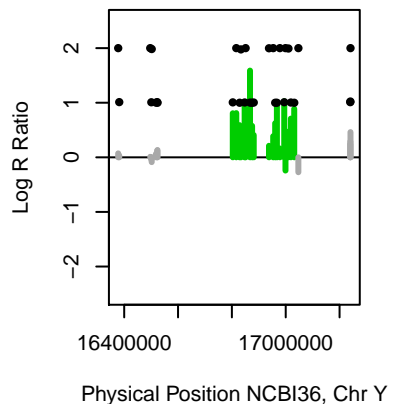

4220473379\_B, nprobe = 17

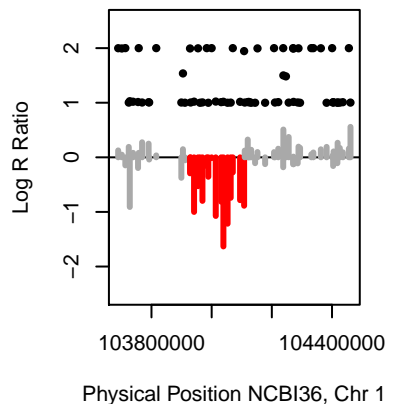

4220473379\_B, nprobe = 16

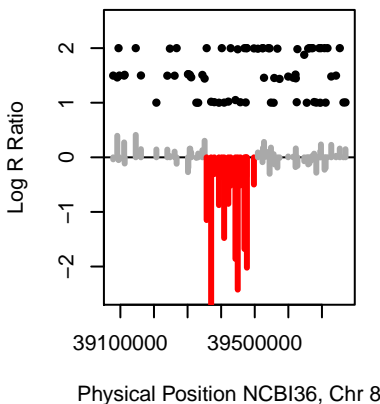

4220473379\_B, nprobe = 24

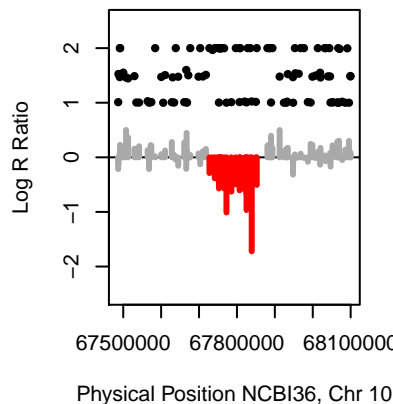

4220473379\_B, nprobe = 10

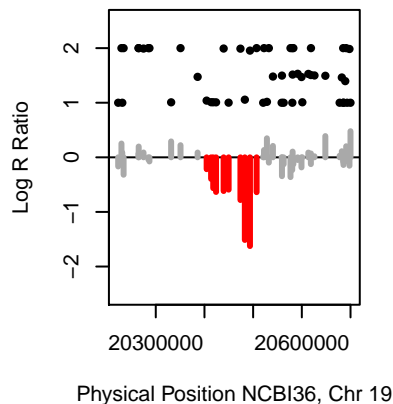

4220473379\_B, nprobe = 24

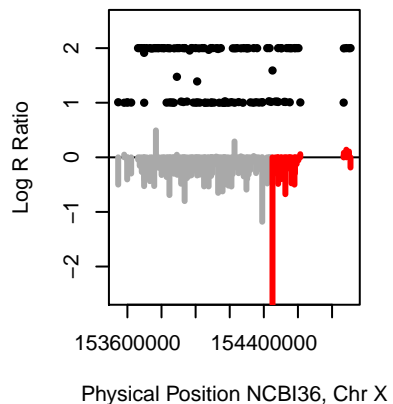

4225320081\_B, nprobe = 18

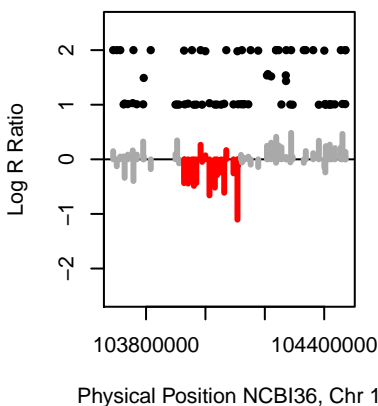

4225320081\_B, nprobe = 62

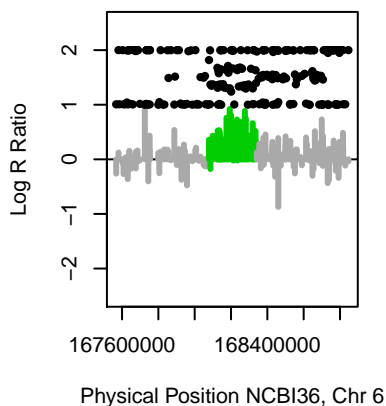

4225320081\_B, nprobe = 16

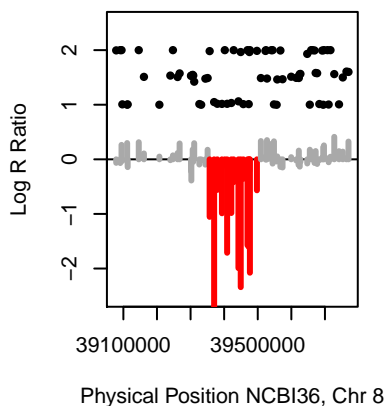

4225320081\_B, nprobe = 59

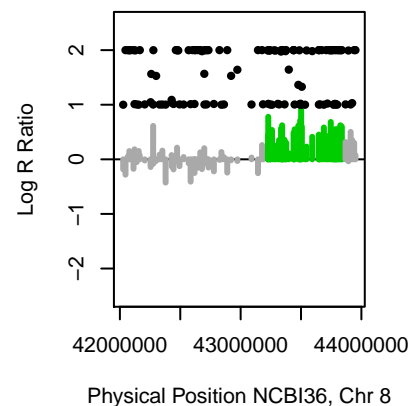

4225320081\_B, nprobe = 14

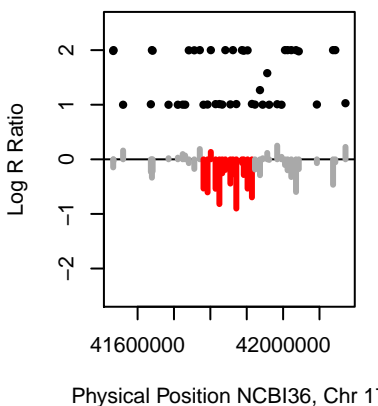

4225320081\_B, nprobe = 24

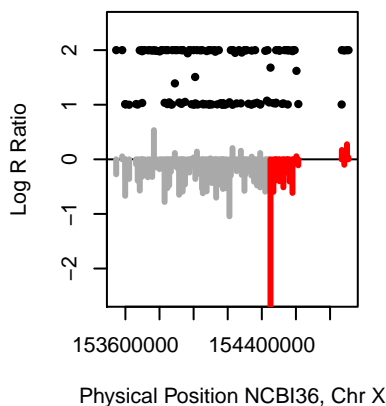

4225320820\_B, nprobe = 15

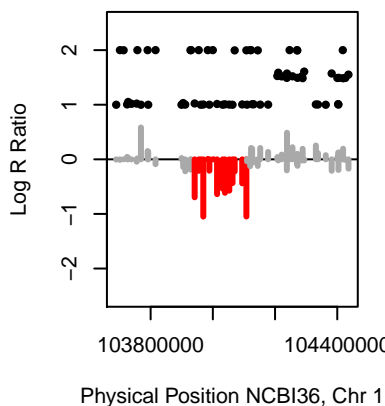

4225320820\_B, nprobe = 65

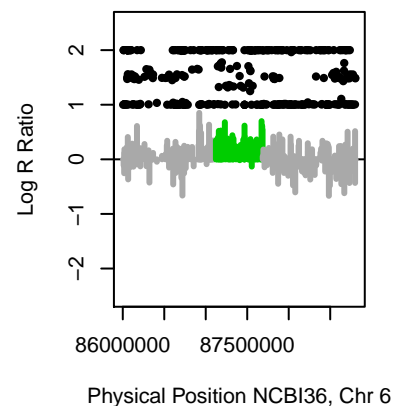

4225320820\_B, nprobe = 16

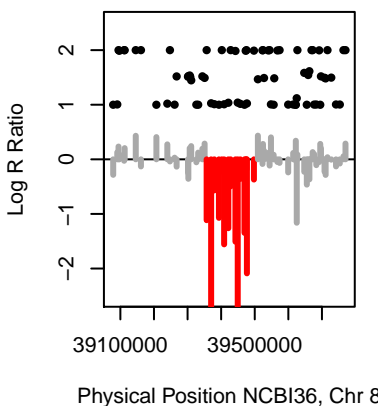

4225320820\_B, nprobe = 18

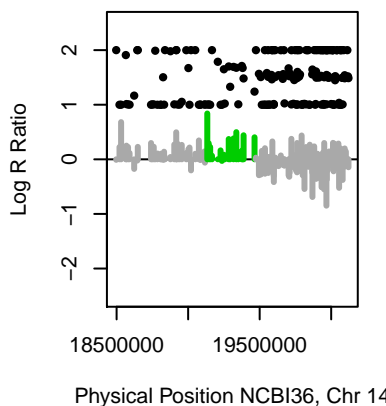

4225320820\_B, nprobe = 40

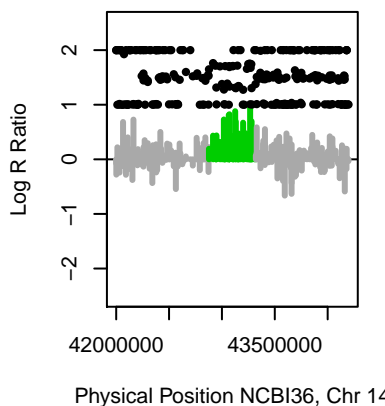

4225320820\_B, nprobe = 14

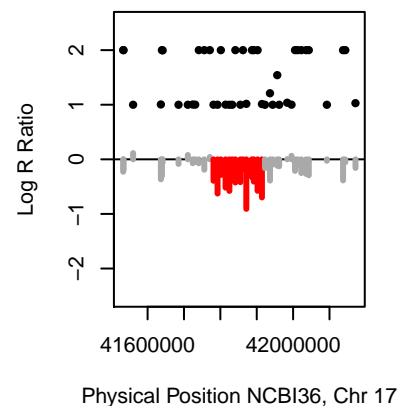

4225320820\_B, nprobe = 10

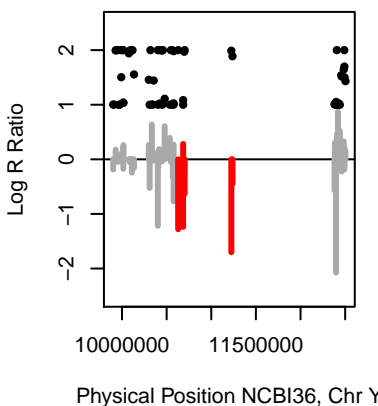

4225320820\_B, nprobe = 10

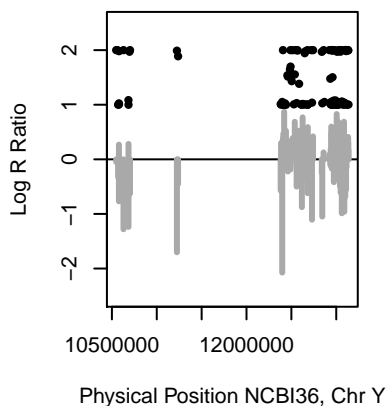

4225320820\_B, nprobe = 24

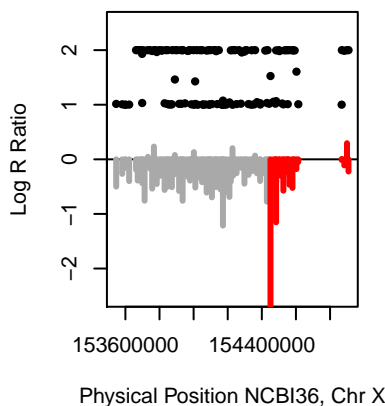

4225320129\_A, nprobe = 16

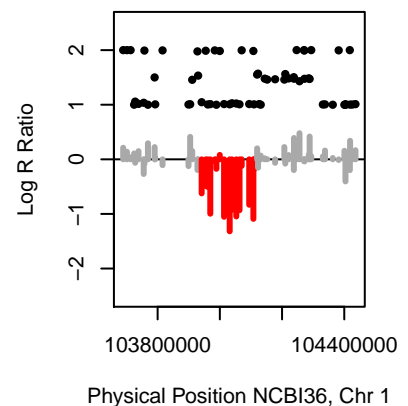

4225320129\_A, nprobe = 33

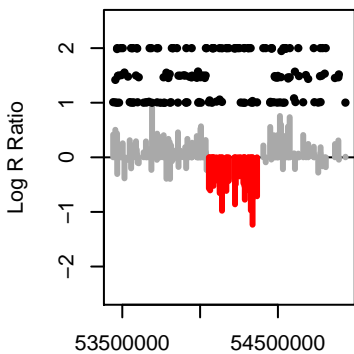

Physical Position NCBI36, Chr 13

4225320129\_A, nprobe = 8

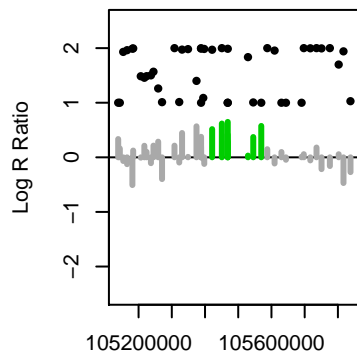

Physical Position NCBI36, Chr 14

4225320129\_A, nprobe = 62

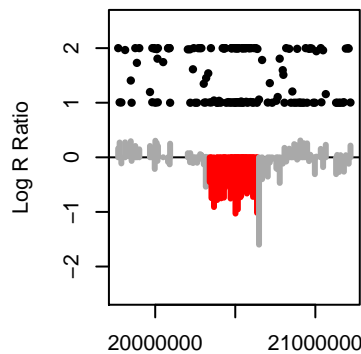

Physical Position NCBI36, Chr 15

4225320129\_A, nprobe = 16

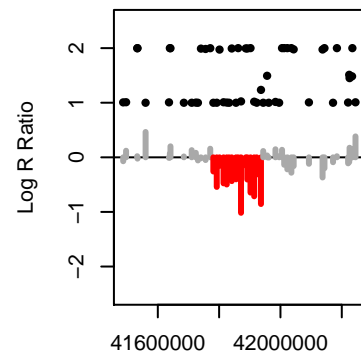

Physical Position NCBI36, Chr 17

4225320129\_A, nprobe = 8

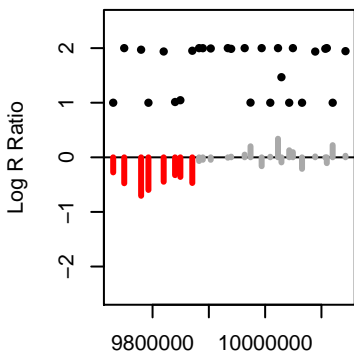

Physical Position NCBI36, Chr 21

4225320129\_A, nprobe = 30

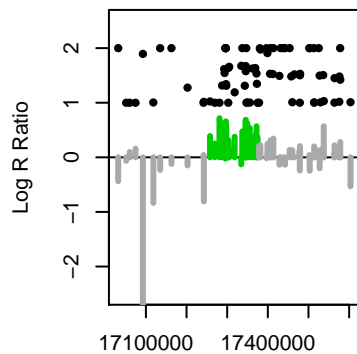

Physical Position NCBI36, Chr 22

4225320129\_A, nprobe = 10

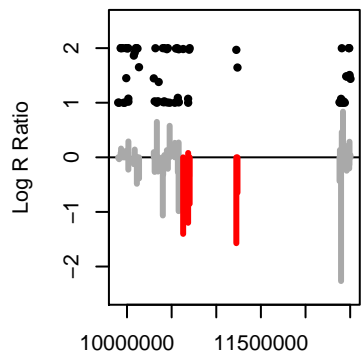

Physical Position NCBI36, Chr Y

4225320129\_A, nprobe = 10

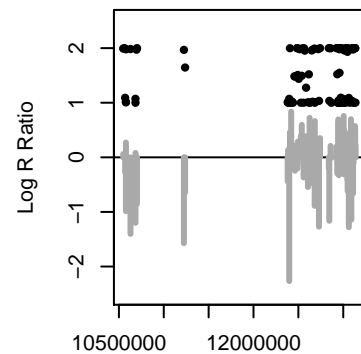

Physical Position NCBI36, Chr Y

4225320129\_A, nprobe = 24

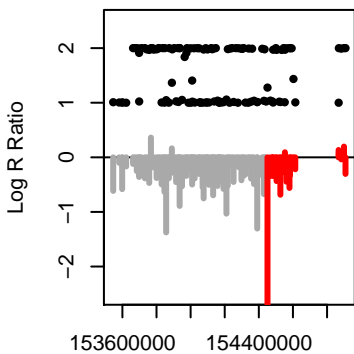

Physical Position NCBI36, Chr X

4225320147\_A, nprobe = 13

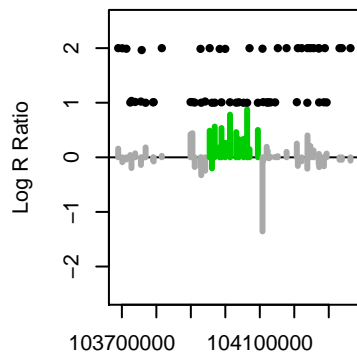

Physical Position NCBI36, Chr 1

4225320147\_A, nprobe = 16

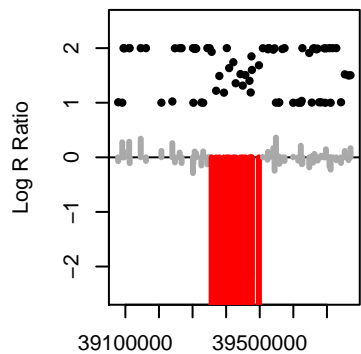

Physical Position NCBI36, Chr 8

4225320147\_A, nprobe = 9

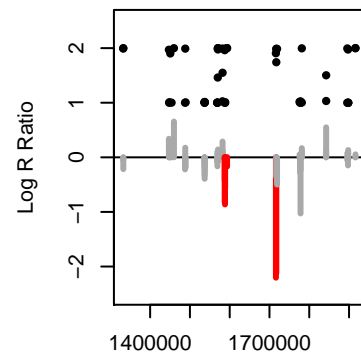

Physical Position NCBI36, Chr X

4225320277\_A, nprobe = 13

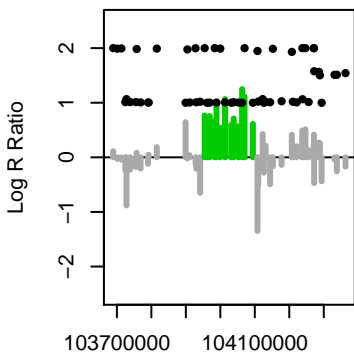

Physical Position NCBI36, Chr 1

4225320277\_A, nprobe = 20

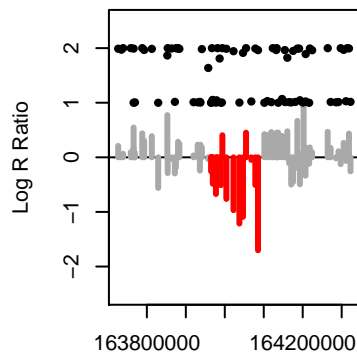

Physical Position NCBI36, Chr 3

4225320277\_A, nprobe = 24

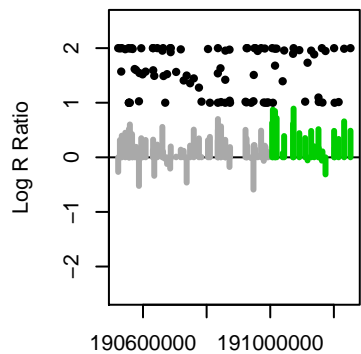

Physical Position NCBI36, Chr 4

4225320277\_A, nprobe = 13

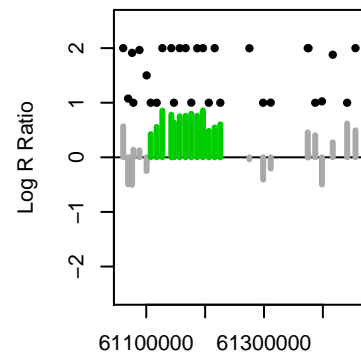

Physical Position NCBI36, Chr 7

4225320277\_A, nprobe = 72

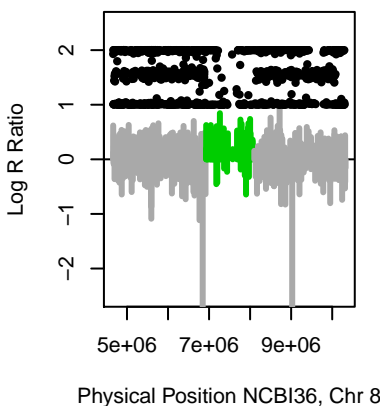

4225320277\_A, nprobe = 23

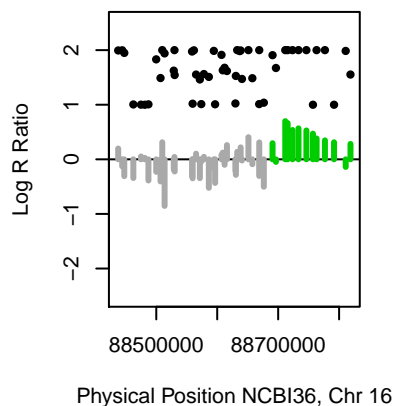

**4225320559\_A, nprobe = 11**

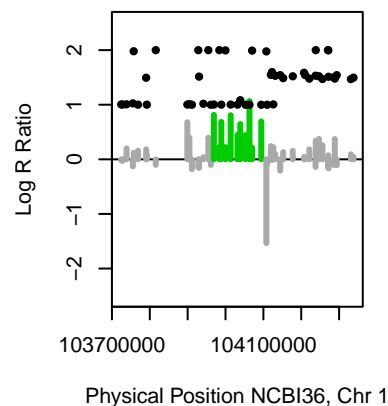

4225320559\_A, nprobe = 13

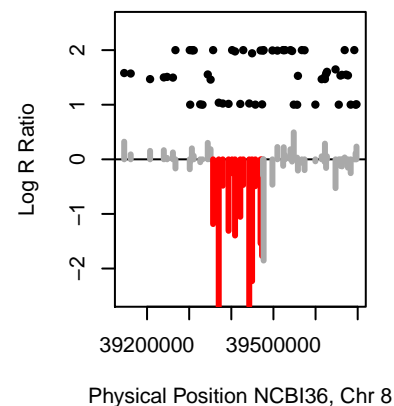

**4225320559\_A, nprobe = 11**

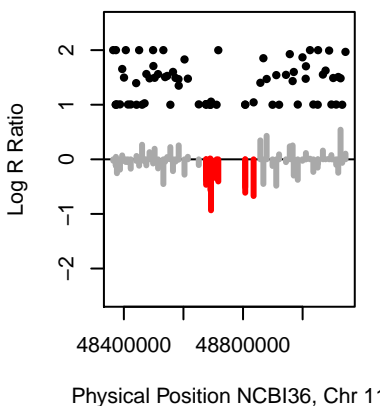

**4225320559\_A, nprobe = 31**

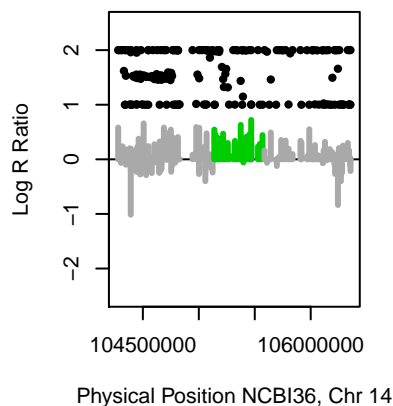

**4225320559\_A, nprobe = 8**

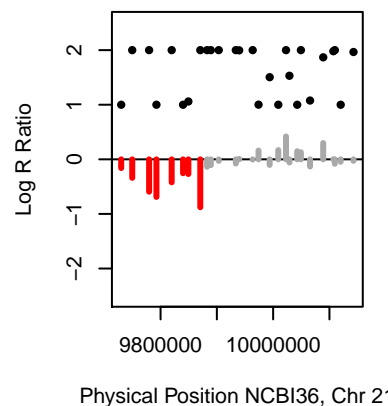

4225320559\_A, nprobe = 34

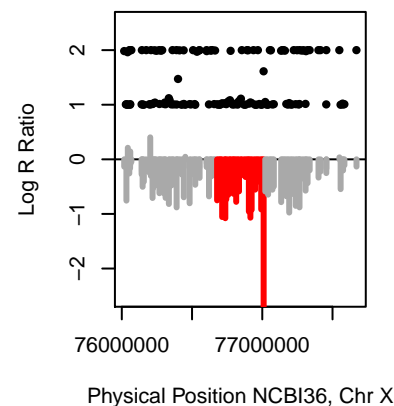

**4225320284\_A, nprobe = 70**

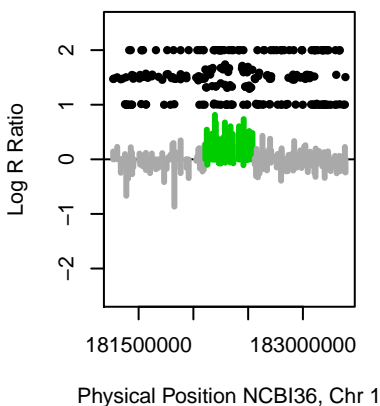

4225320284\_A, nprobe = 16

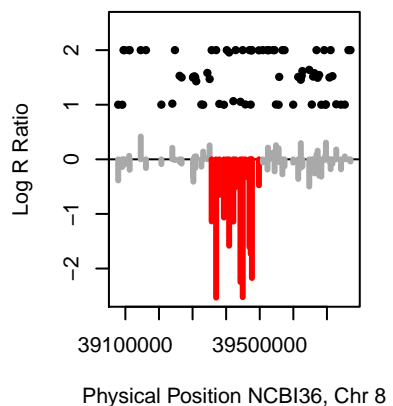

4225320284\_A, nprobe = 15

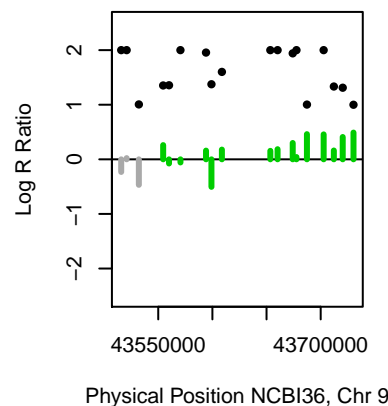

4225320284\_A, nprobe = 50

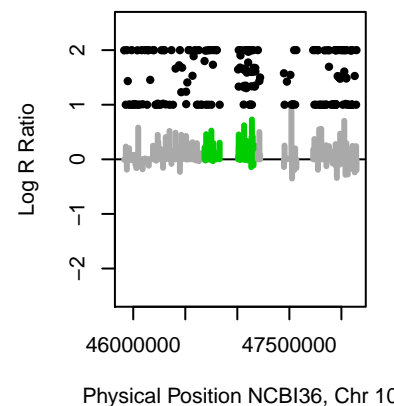

4225320284\_A, nprobe = 24

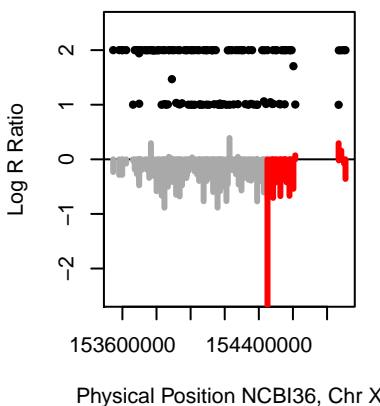

4225320232\_B, nprobe = 18

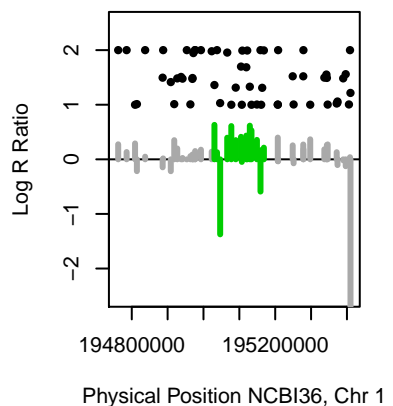

4225320232\_B, nprobe = 10

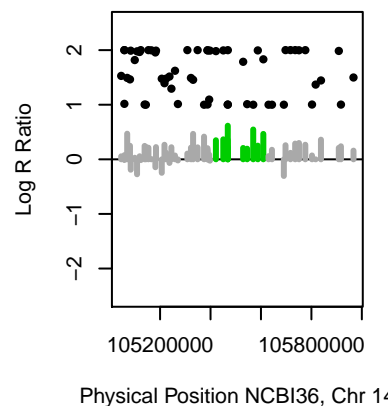

4225320232\_B, nprobe = 14

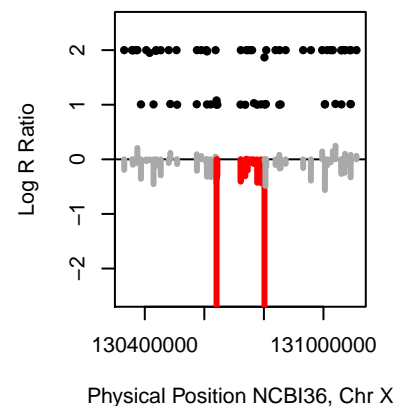

4225320232\_B, nprobe = 10

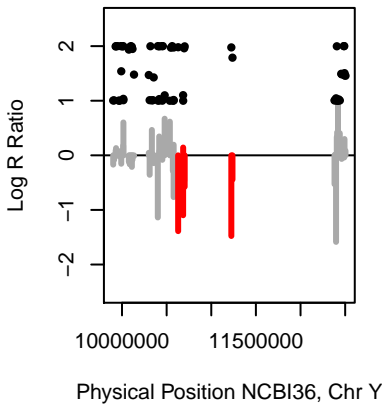

4225320232\_B, nprobe = 10

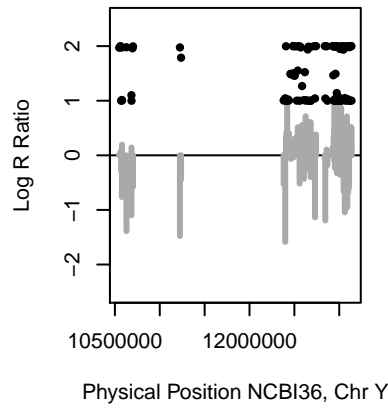

4225320232\_B, nprobe = 24

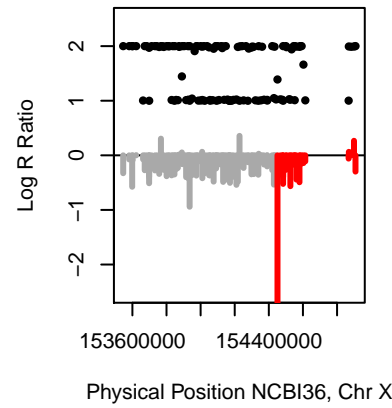

4225320087\_B, nprobe = 18

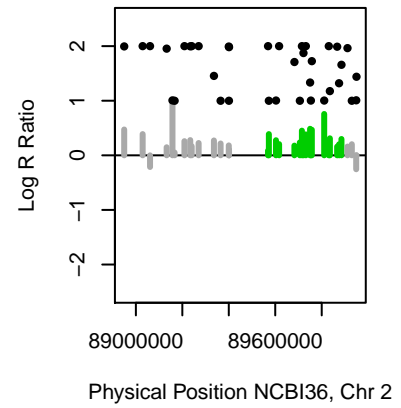

4225320087\_B, nprobe = 8

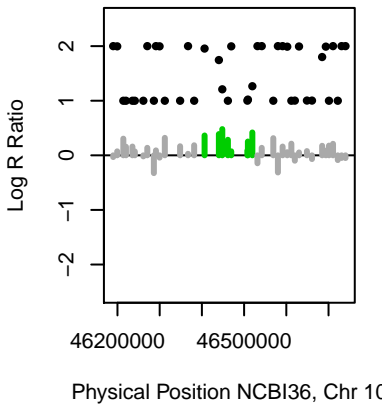

4225320087\_B, nprobe = 8

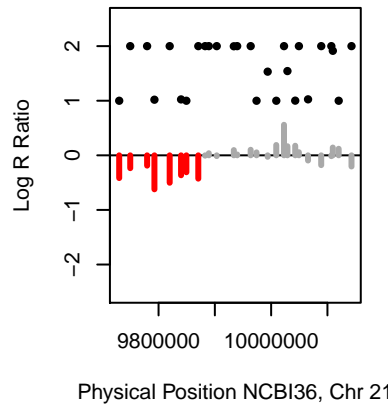

4225320087\_B, nprobe = 28

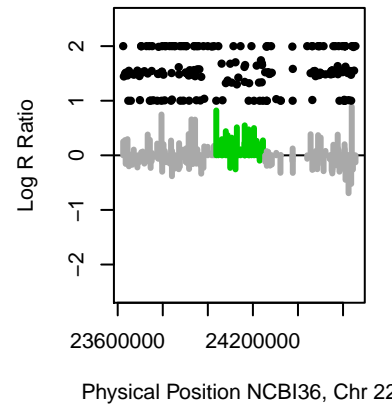

4225320087\_B, nprobe = 15

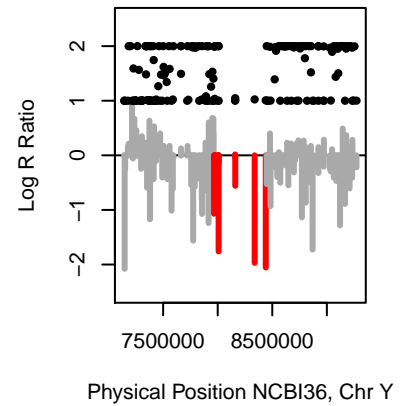

4225320087\_B, nprobe = 24

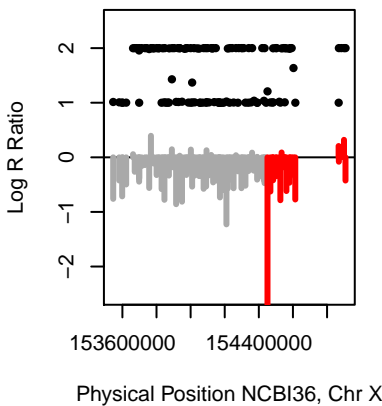

4225320332\_A, nprobe = 10

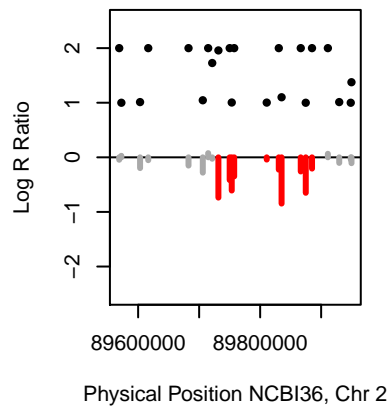

4225320332\_A, nprobe = 16

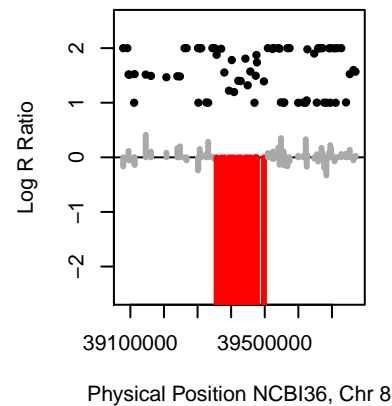

4225320332\_A, nprobe = 34

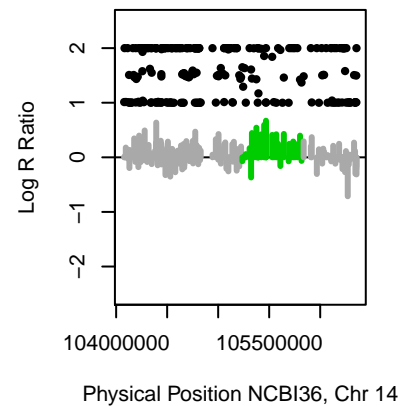

4225320332\_A, nprobe = 10

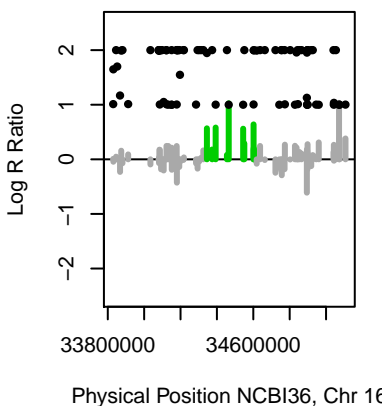

4225320332\_A, nprobe = 13

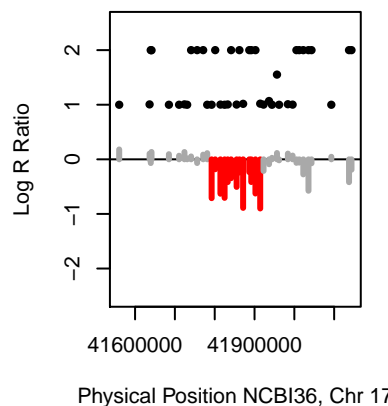

4225320332\_A, nprobe = 34

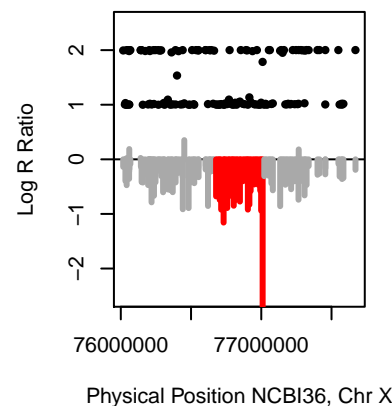

4225320288\_A, nprobe = 15

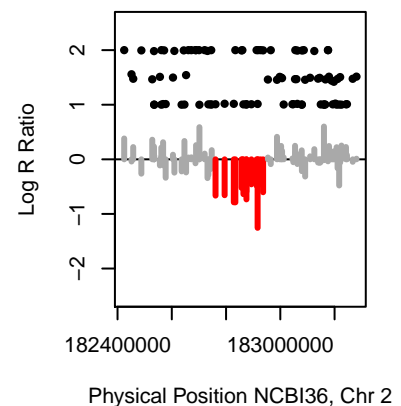

4225320288\_A, nprobe = 31

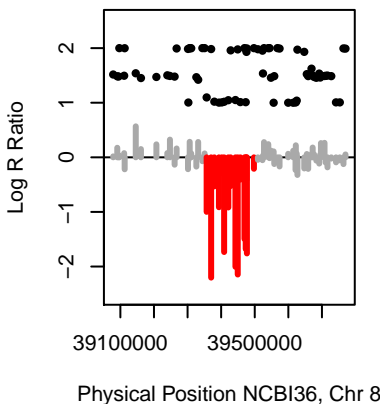

4225320288\_A, nprobe = 25

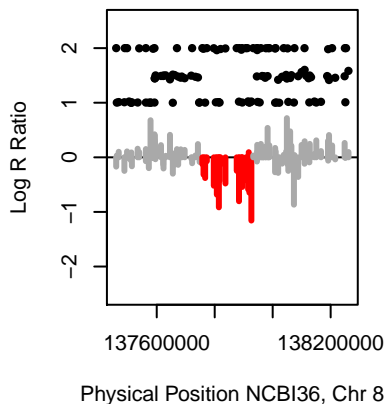

4225320288\_A, nprobe = 24

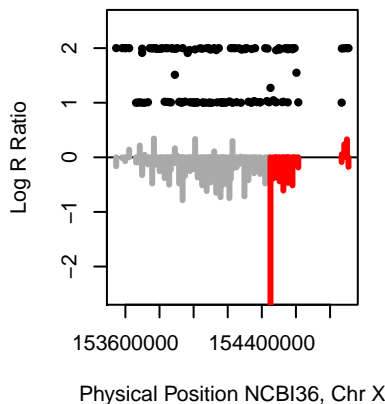

4225320275\_B, nprobe = 23

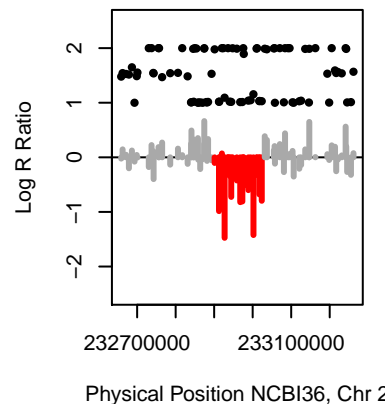

4225320275\_B, nprobe = 16

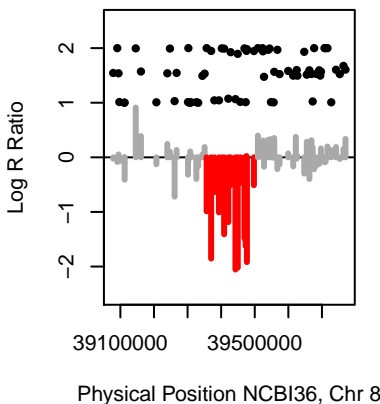

4225320275\_B, nprobe = 32

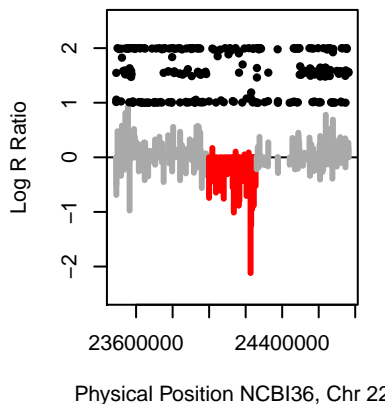

4225320275\_B, nprobe = 10

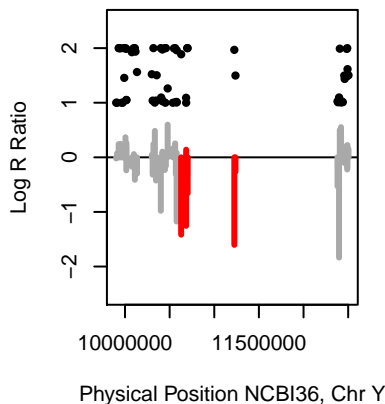

4225320275\_B, nprobe = 10

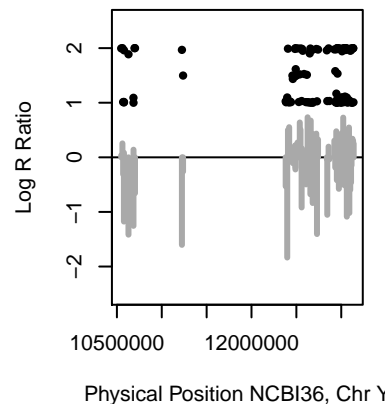

4225320286\_B, nprobe = 17

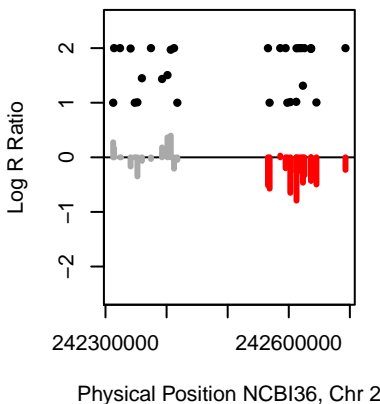

4225320286\_B, nprobe = 26

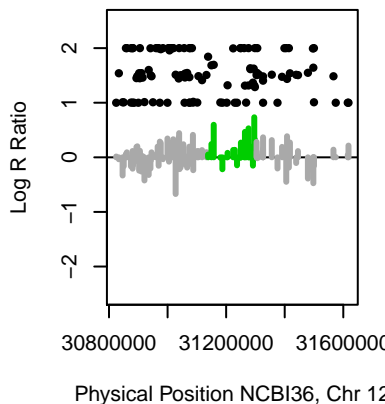

4225320286\_B, nprobe = 13

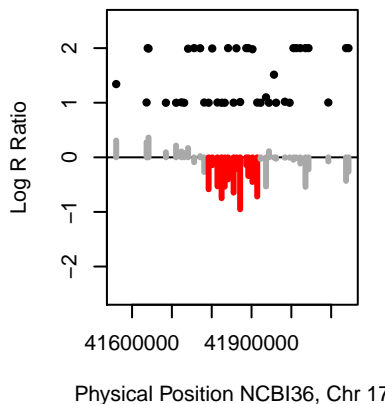

4225320286\_B, nprobe = 76

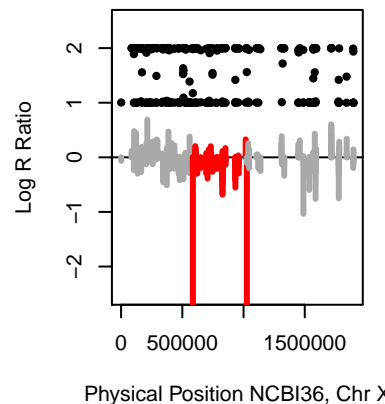

4225320286\_B, nprobe = 10

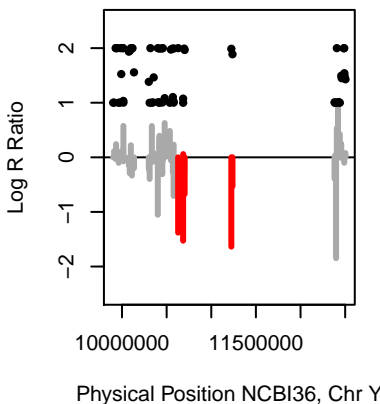

4225320286\_B, nprobe = 10

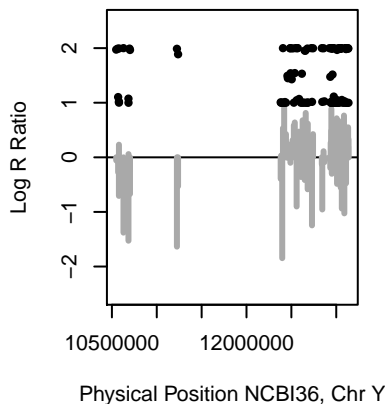

4225320286\_B, nprobe = 24

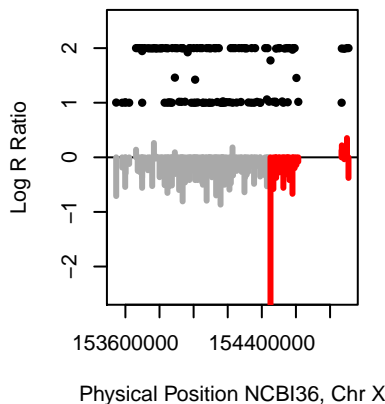

4225320791\_B, nprobe = 18

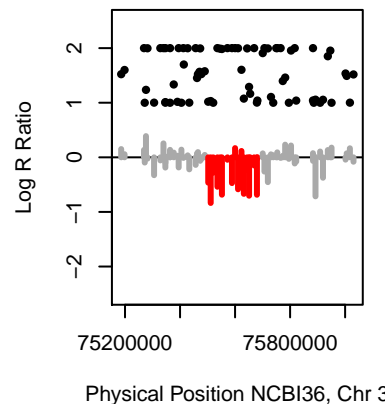

4225320791\_B, nprobe = 16

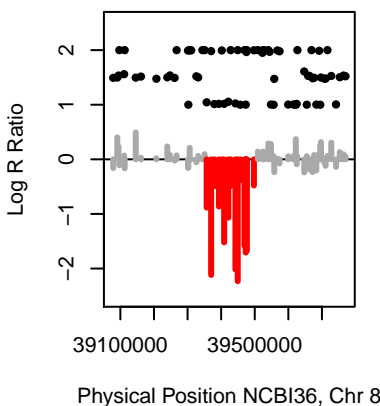

4225320791\_B, nprobe = 21

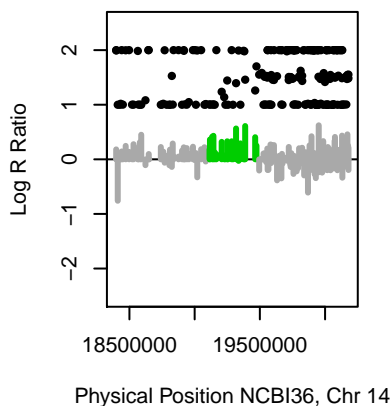

4225320791\_B, nprobe = 36

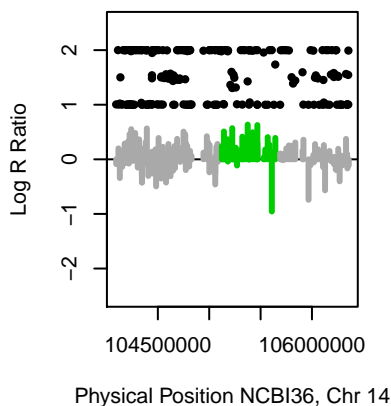

4225320791\_B, nprobe = 212

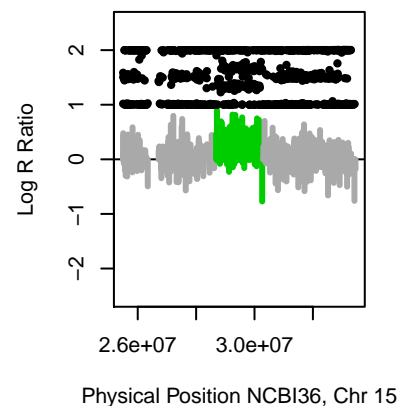

4225320791\_B, nprobe = 26

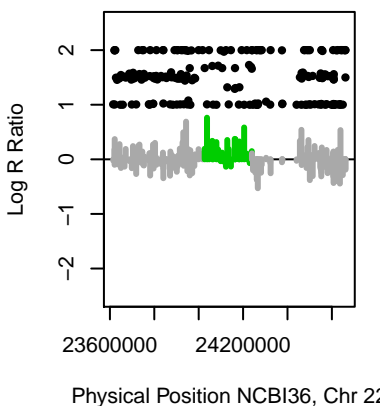

4225320881\_A, nprobe = 21

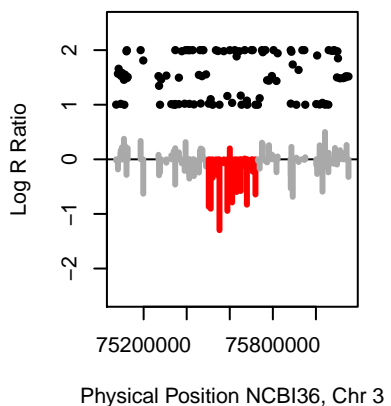

4225320881\_A, nprobe = 16

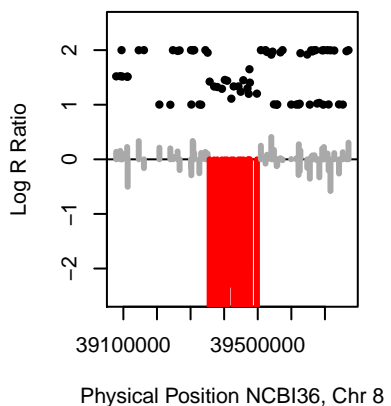

4225320881\_A, nprobe = 14

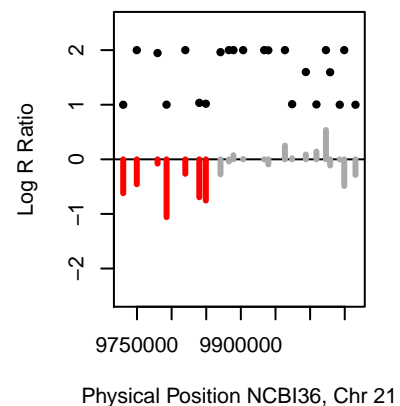

4225320401\_A, nprobe = 38

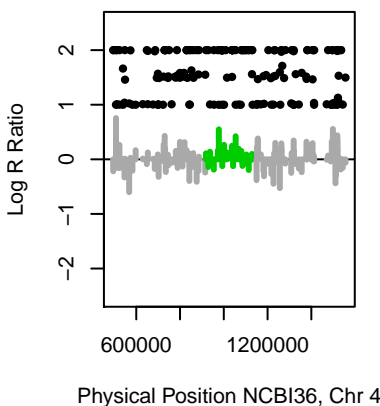

4225320401\_A, nprobe = 34

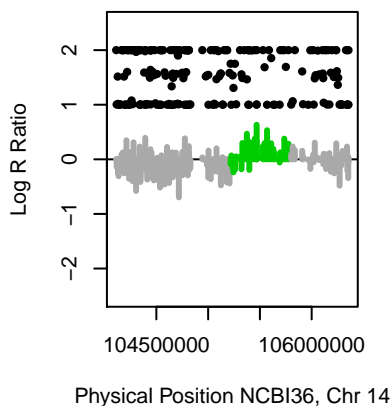

4225320636\_A, nprobe = 20

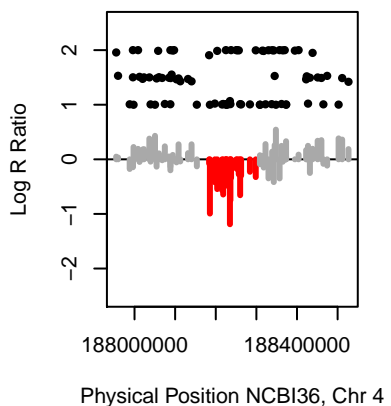

4225320636\_A, nprobe = 83

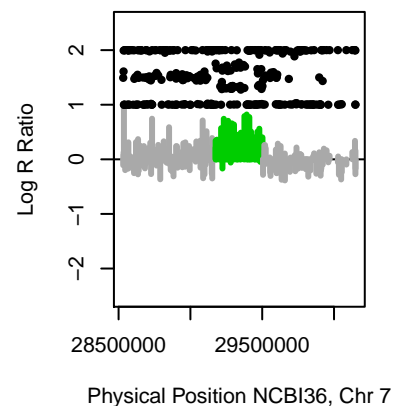

4225320636\_A, nprobe = 50

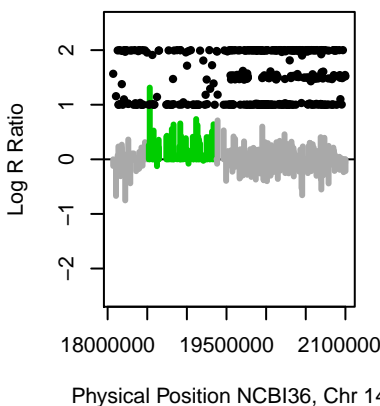

4225320636\_A, nprobe = 10

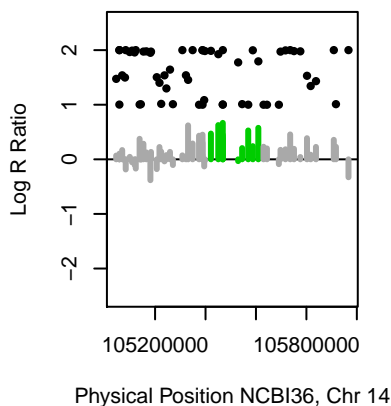

4225320636\_A, nprobe = 10

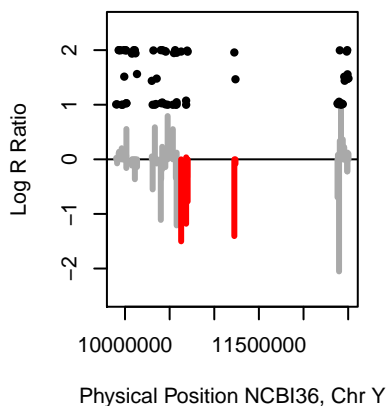

4225320636\_A, nprobe = 10

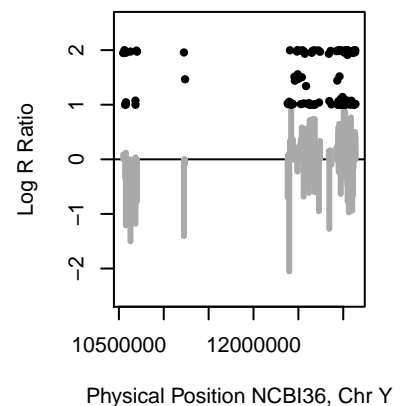



4252441220\_B, nprobe = 9

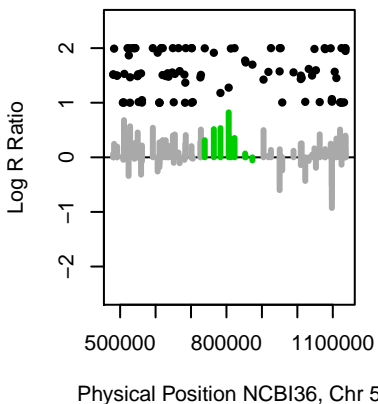

4252441220\_B, nprobe = 17

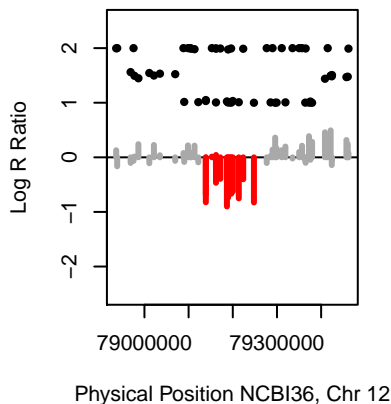

4252441220\_B, nprobe = 13

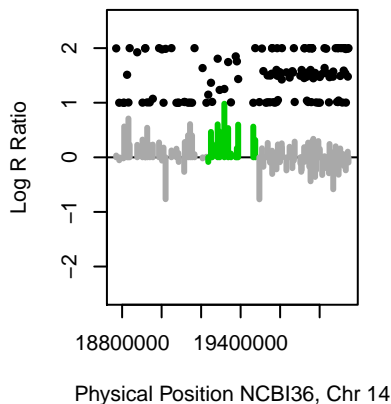

4252441220\_B, nprobe = 15

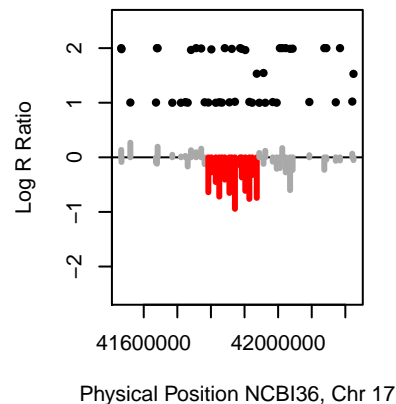

4252441220\_B, nprobe = 8

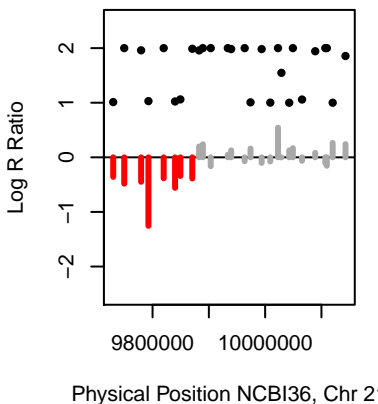

4225320774\_B, nprobe = 22

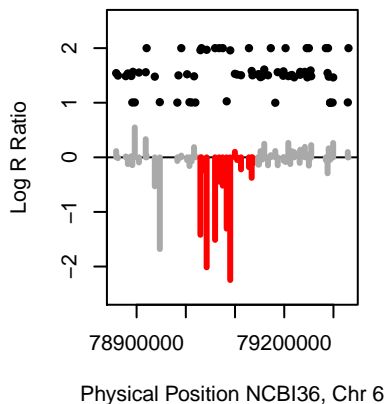

4225320774\_B, nprobe = 70

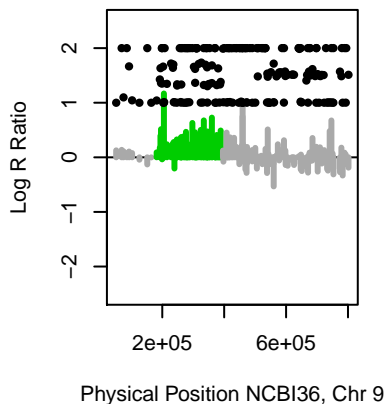

4225320774\_B, nprobe = 25

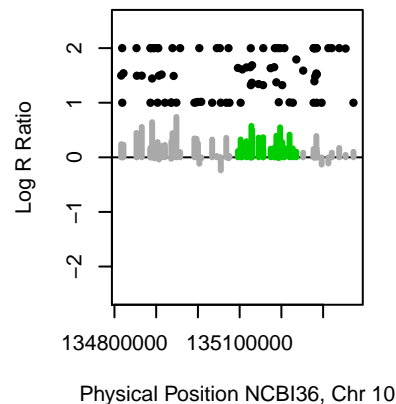

4225320774\_B, nprobe = 12

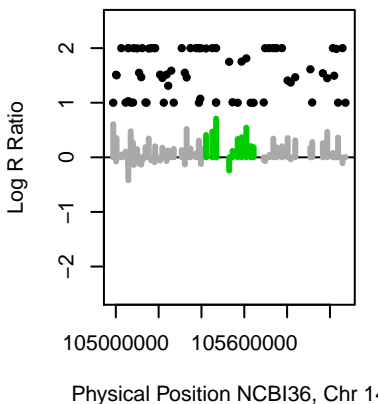

4225320774\_B, nprobe = 29

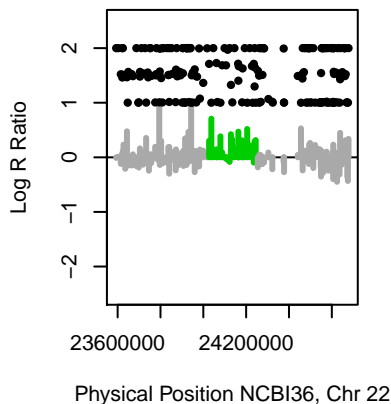

4225320774\_B, nprobe = 24

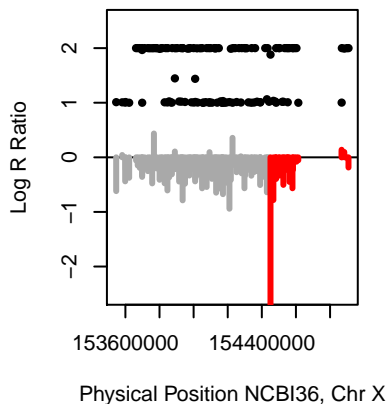

4225320212\_A, nprobe = 10

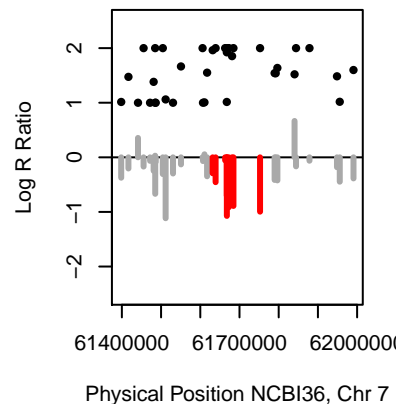

4225320212\_A, nprobe = 16

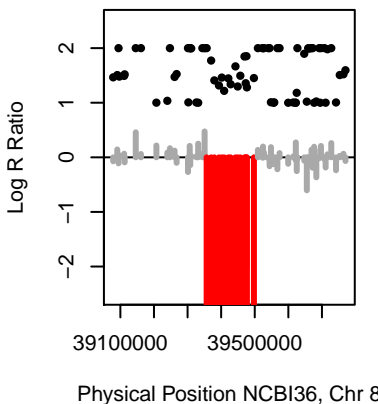

4225320212\_A, nprobe = 55

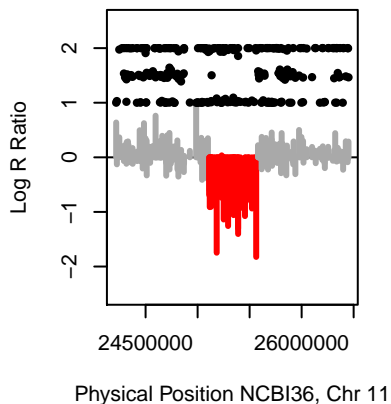

4225320212\_A, nprobe = 8

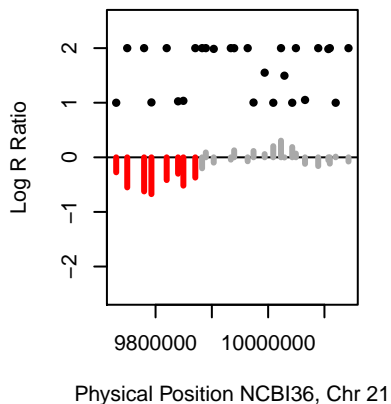

4225320212\_A, nprobe = 27

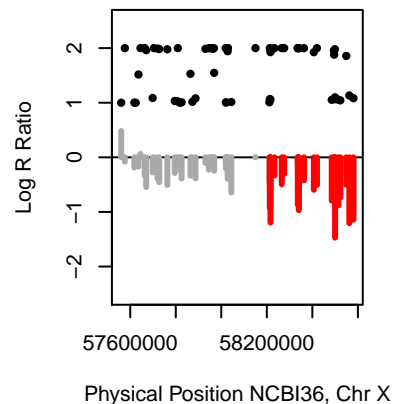

4225320212\_A, nprobe = 24

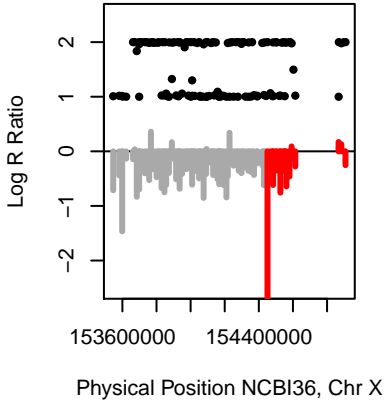

4225320286\_A, nprobe = 23

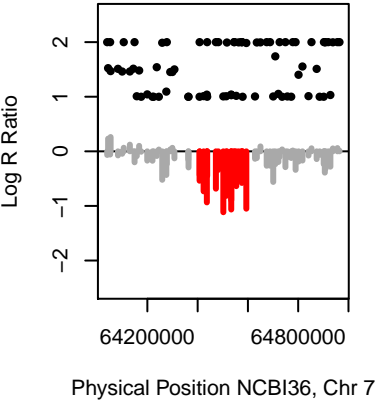

4225320286\_A, nprobe = 13

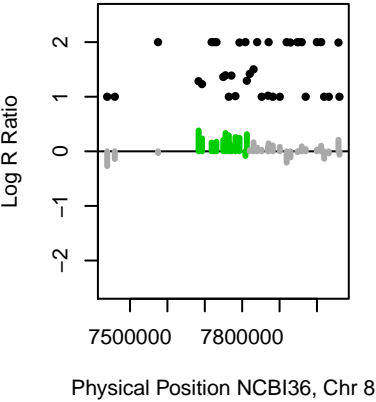

4225320286\_A, nprobe = 16

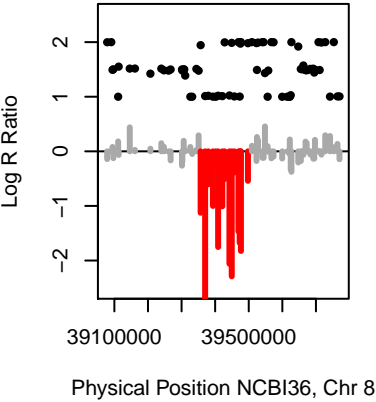

4225320286\_A, nprobe = 11

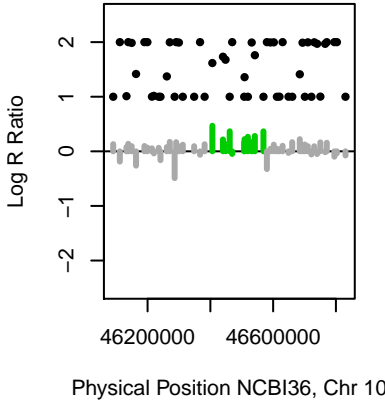

4225320286\_A, nprobe = 20

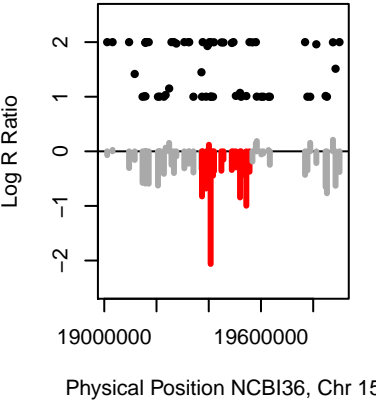

4225320286\_A, nprobe = 15

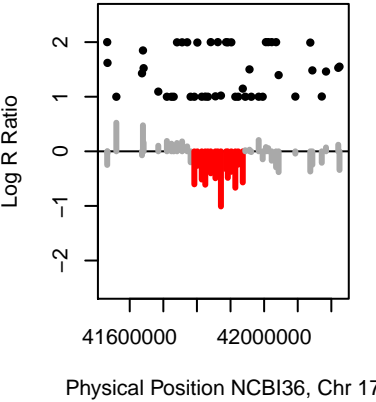

4225320286\_A, nprobe = 16

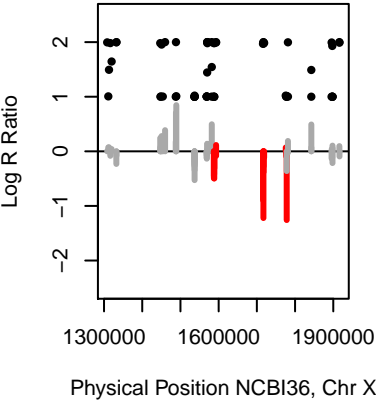

4225320286\_A, nprobe = 24

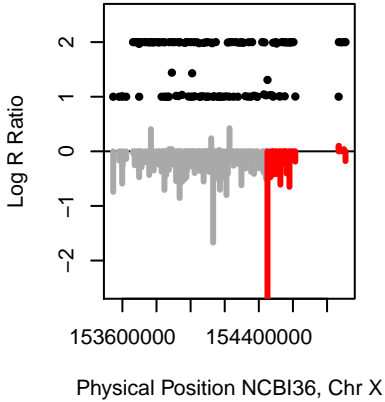

4225320243\_B, nprobe = 34

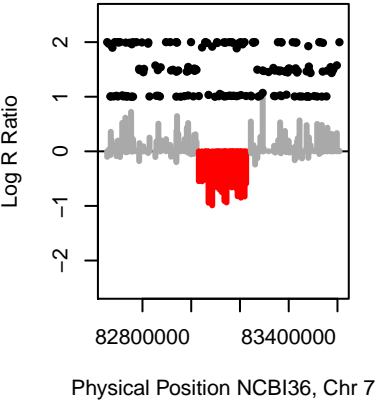

4225320243\_B, nprobe = 14

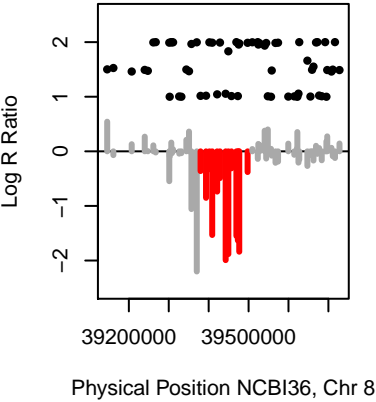

4225320243\_B, nprobe = 40

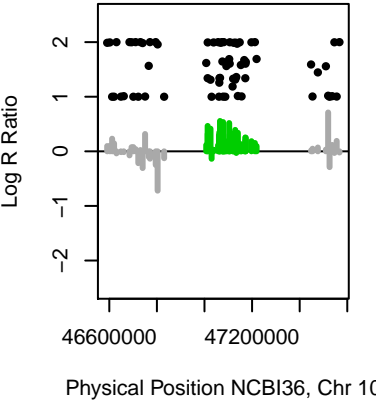

4225320243\_B, nprobe = 62

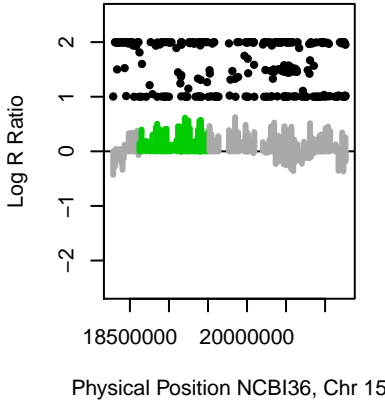

4225320243\_B, nprobe = 7

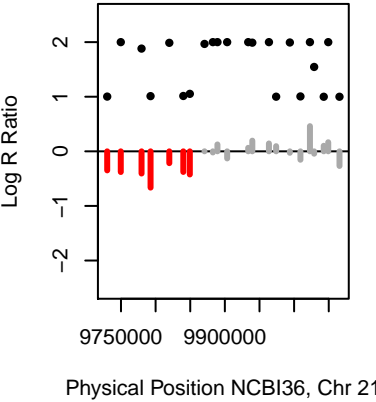

4225320243\_B, nprobe = 24

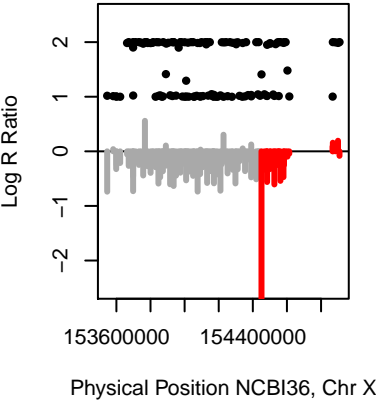

4225320032\_B, nprobe = 55

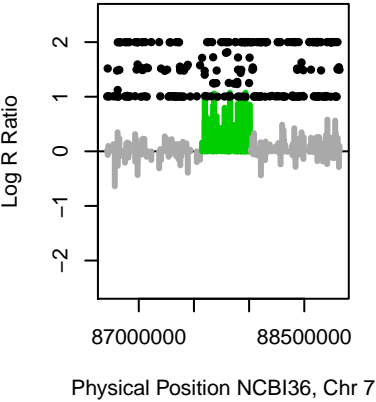

4225320032\_B, nprobe = 15

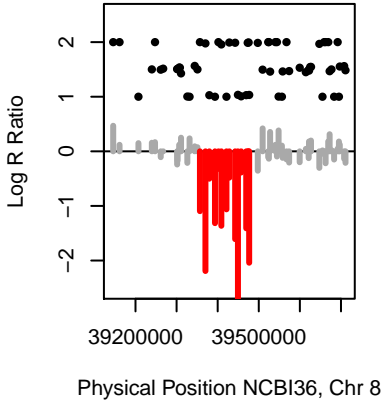

4225320032\_B, nprobe = 29

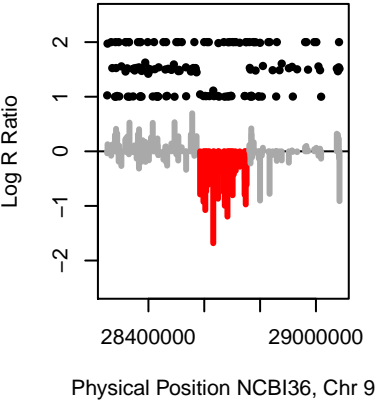

4225320032\_B, nprobe = 8

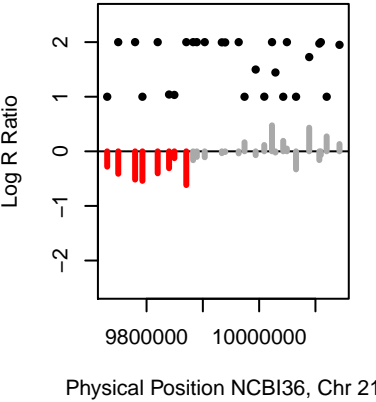

4225320032\_B, nprobe = 77

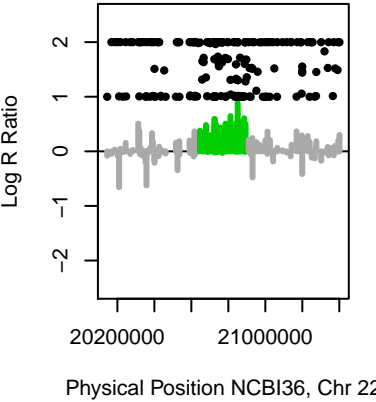

4225320032\_B, nprobe = 10

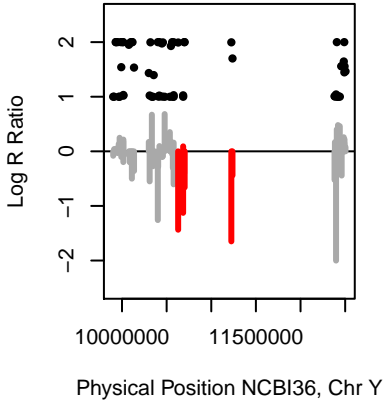

4225320032\_B, nprobe = 10

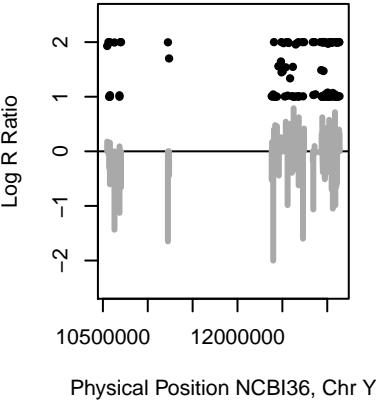

4225320032\_B, nprobe = 24

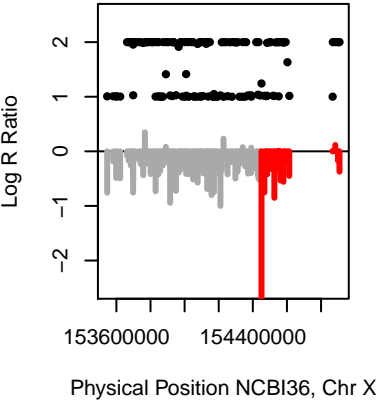

4225320258\_A, nprobe = 25

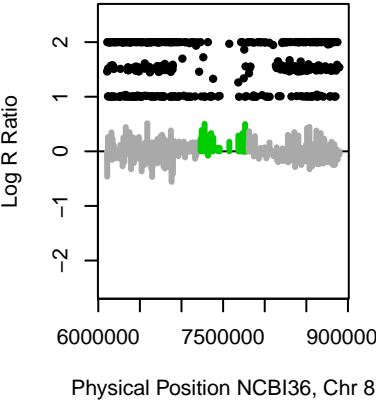

4225320258\_A, nprobe = 16

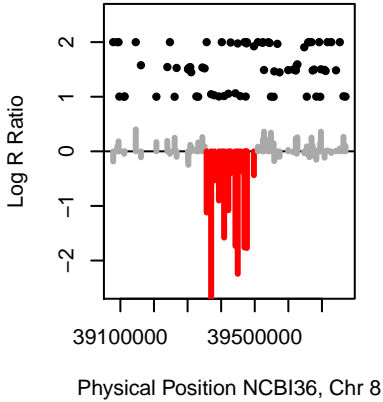

4225320258\_A, nprobe = 15

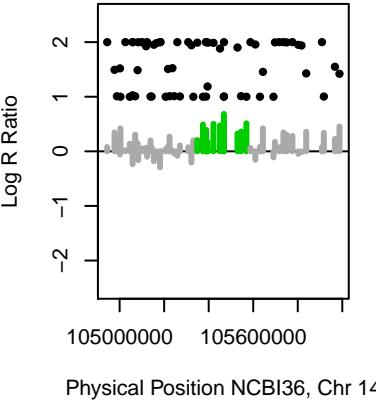

4225320258\_A, nprobe = 24

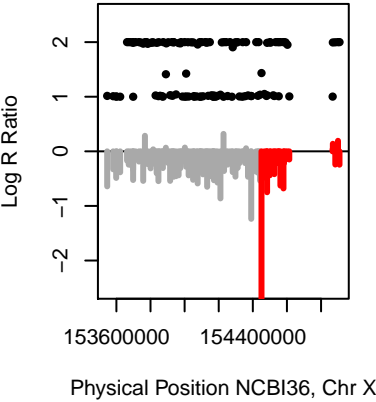

4225320316\_A, nprobe = 26

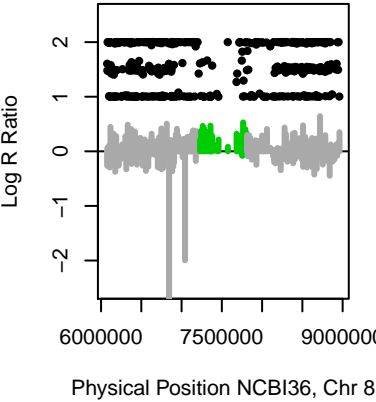

4225320316\_A, nprobe = 16

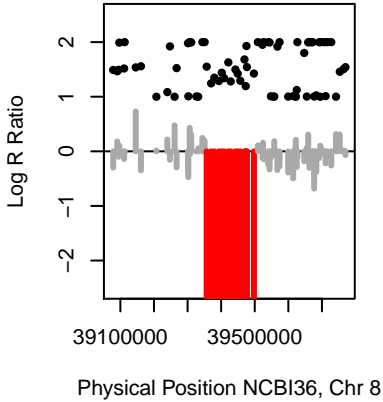

4225320316\_A, nprobe = 11

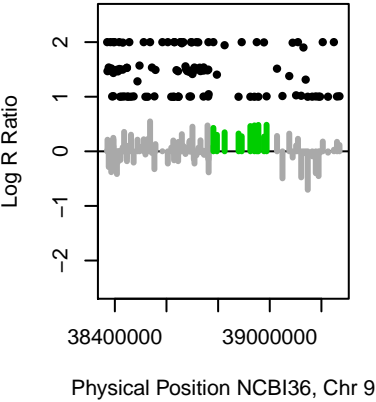

4225320316\_A, nprobe = 28

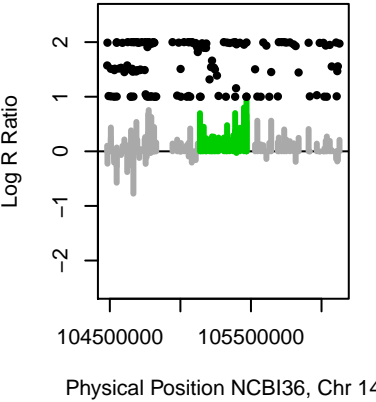

4225320316\_A, nprobe = 30

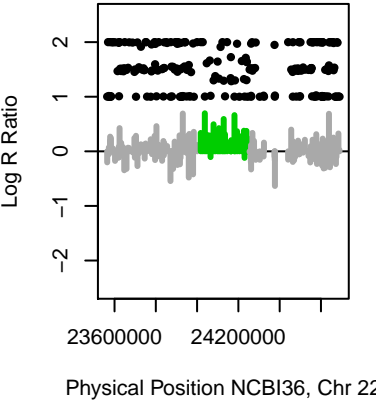

4225320840\_B, nprobe = 29

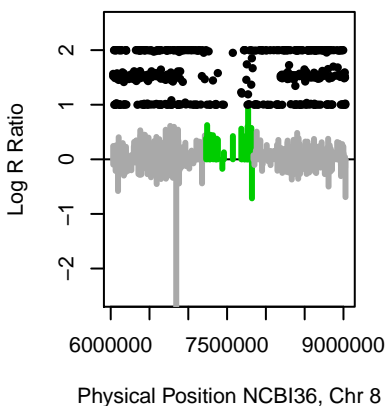

**4225320840\_B, nprobe = 16**

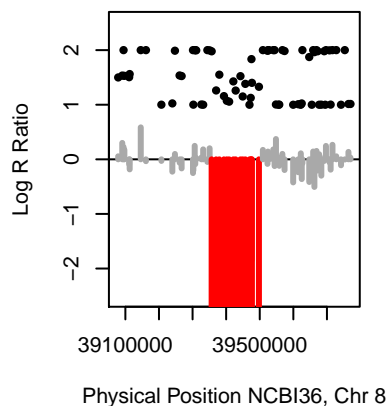

**4225320840\_B, nprobe = 10**

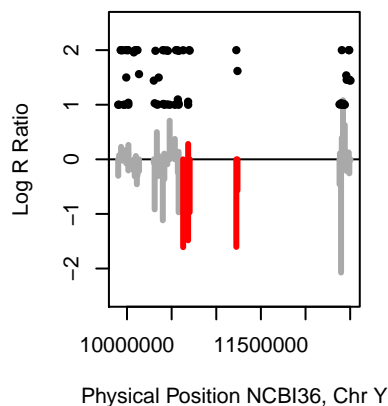

4225320840\_B, nprobe = 10

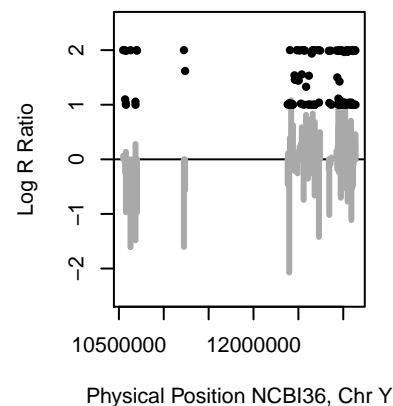

**4225320319\_A, nprobe = 27**

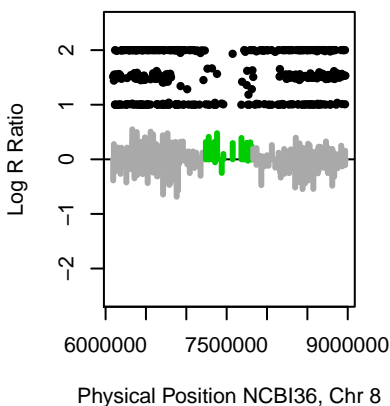

**4225320319\_A, nprobe = 16**

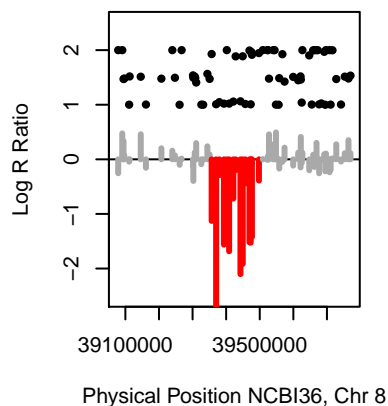

**4225320319\_A, nprobe = 25**

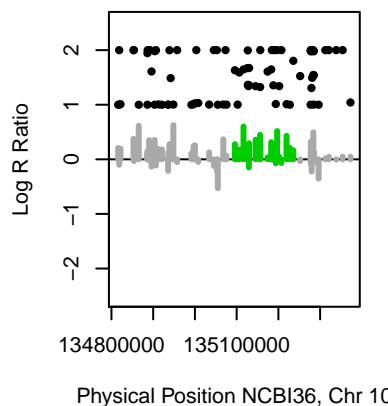

4225320319\_A, nprobe = 22

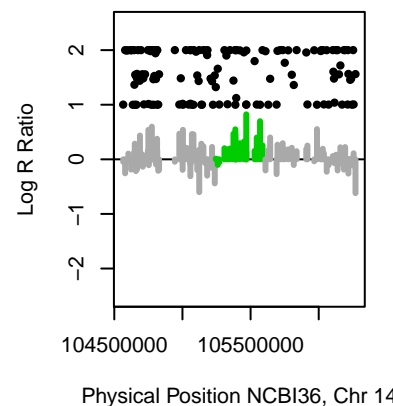

**4225320319\_A, nprobe = 36**

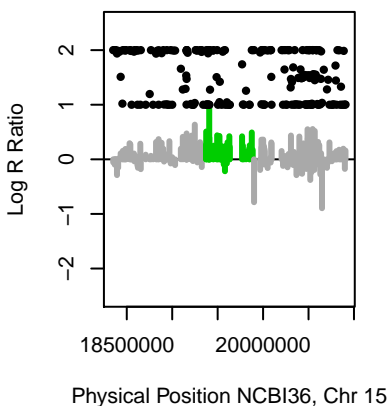

**4225320319\_A, nprobe = 26**

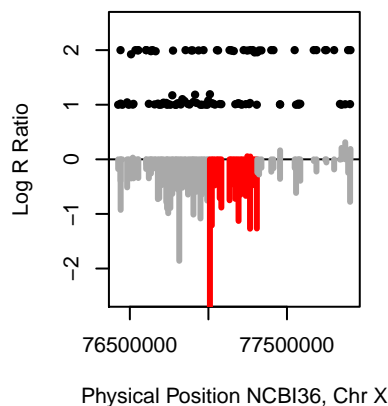

**4225320319\_A, nprobe = 24**

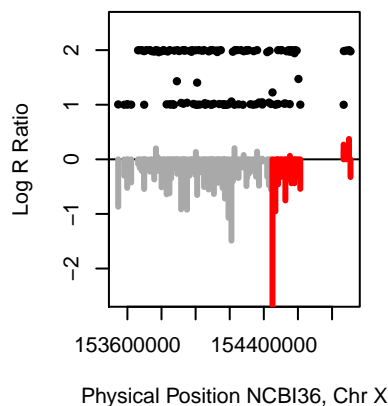

4225320840\_A, nprobe = 8

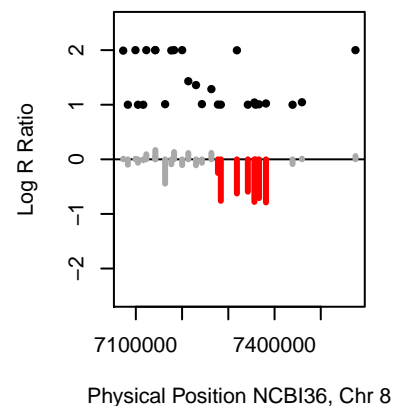

**4225320840\_A, nprobe = 16**

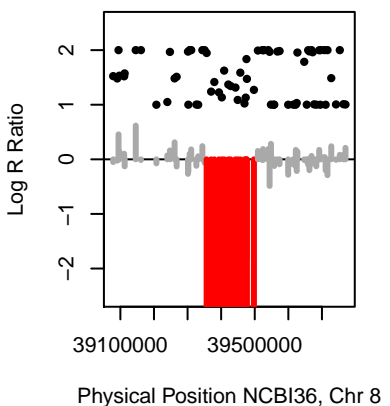

**4225320840\_A, nprobe = 89**

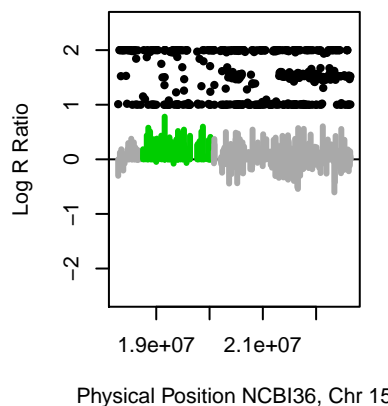

**4225320840\_A, nprobe = 20**

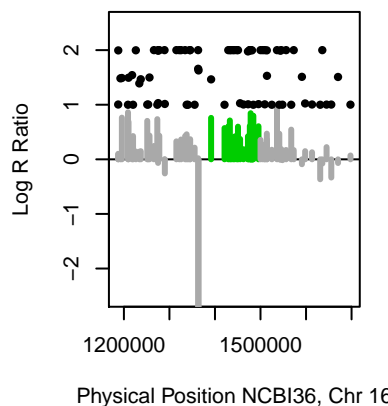

4225320840\_A, nprobe = 67

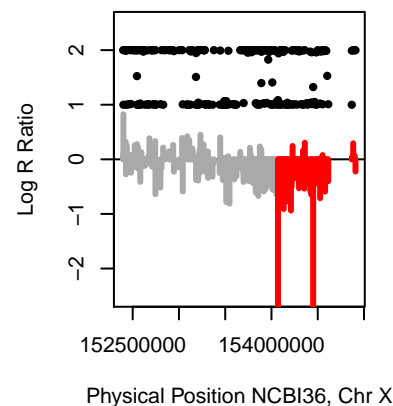

Physical Position NCBI36, Chr 16

4225320216\_B, nprobe = 8

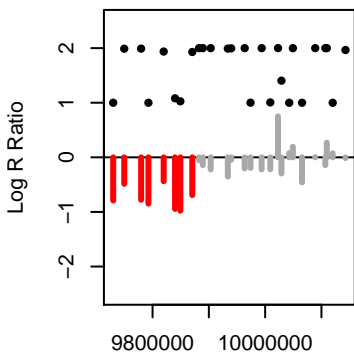

Physical Position NCBI36, Chr 21

4225320216\_B, nprobe = 10

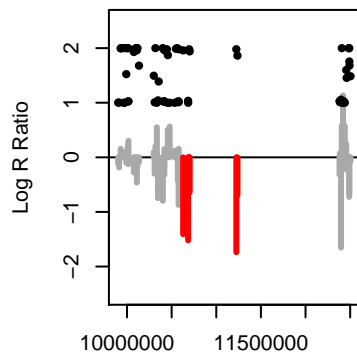

Physical Position NCBI36, Chr Y

4225320216\_B, nprobe = 10

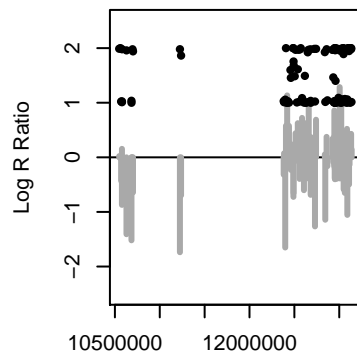

Physical Position NCBI36, Chr Y

4225320023\_A, nprobe = 15

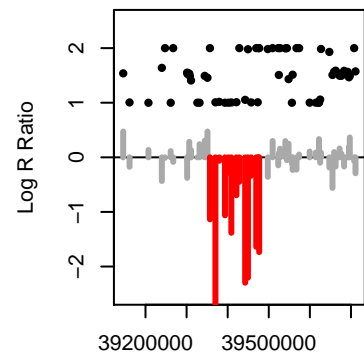

Physical Position NCBI36, Chr 8

4225320023\_A, nprobe = 23

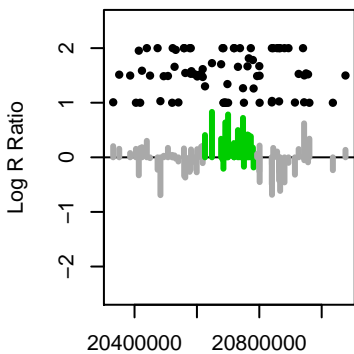

Physical Position NCBI36, Chr 19

4225320095\_A, nprobe = 15

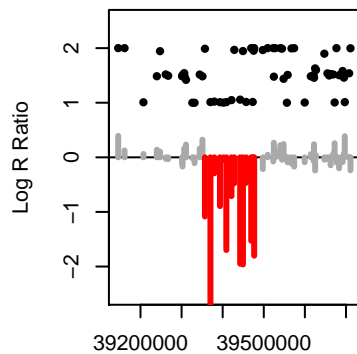

Physical Position NCBI36, Chr 8

4225320095\_A, nprobe = 32

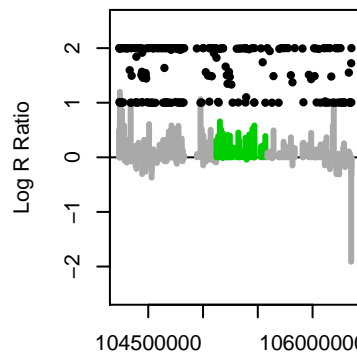

Physical Position NCBI36, Chr 14

4225320239\_A, nprobe = 15

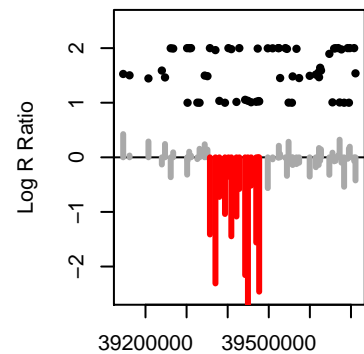

Physical Position NCBI36, Chr 8

4225320239\_A, nprobe = 25

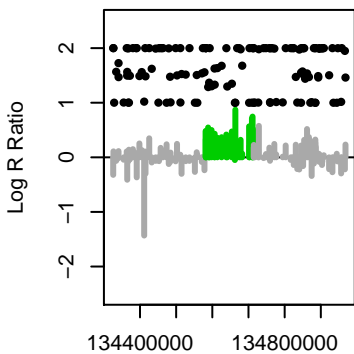

Physical Position NCBI36, Chr 9

4225320239\_A, nprobe = 24

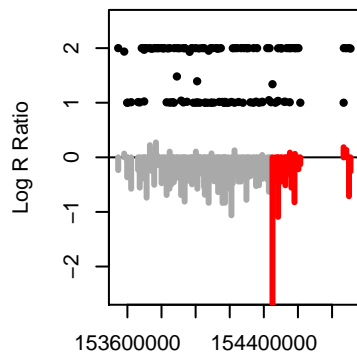

Physical Position NCBI36, Chr X

4225320341\_B, nprobe = 16

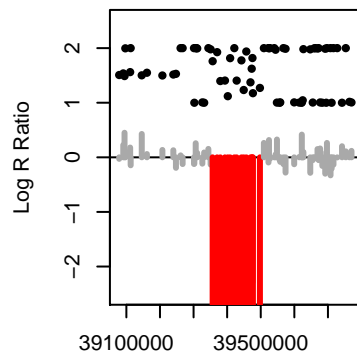

Physical Position NCBI36, Chr 8

4225320341\_B, nprobe = 11

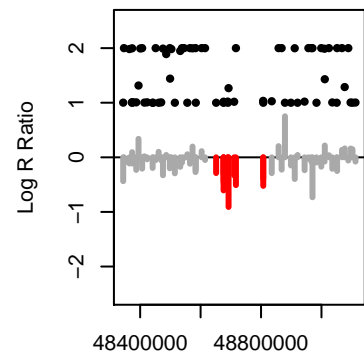

Physical Position NCBI36, Chr 11

4225320341\_B, nprobe = 8

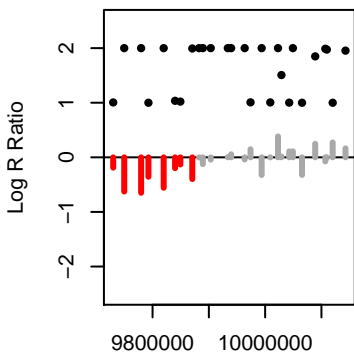

Physical Position NCBI36, Chr 21

4225320341\_B, nprobe = 24

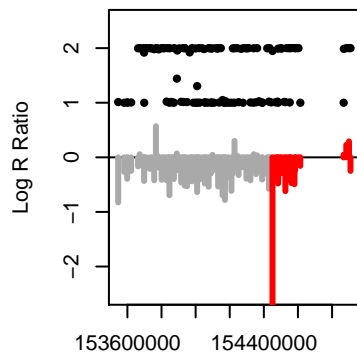

Physical Position NCBI36, Chr X

4225320397\_B, nprobe = 16

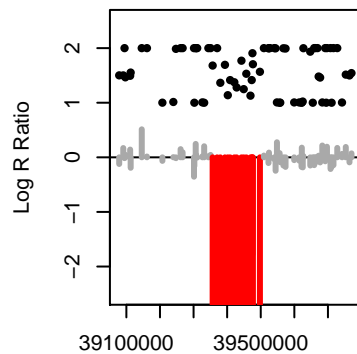

Physical Position NCBI36, Chr 8

4225320397\_B, nprobe = 21

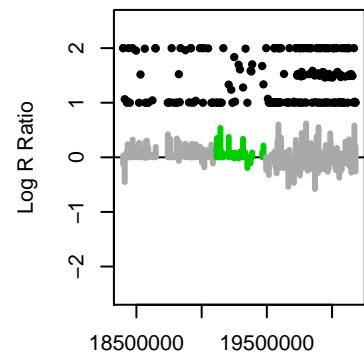

Physical Position NCBI36, Chr 14

4225320397\_B, nprobe = 29

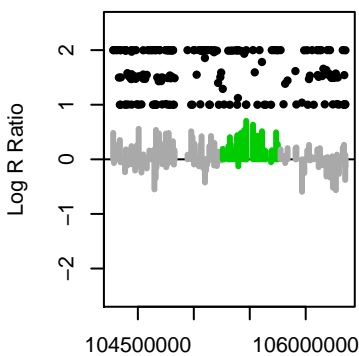

Physical Position NCBI36, Chr 14

4225320397\_B, nprobe = 12

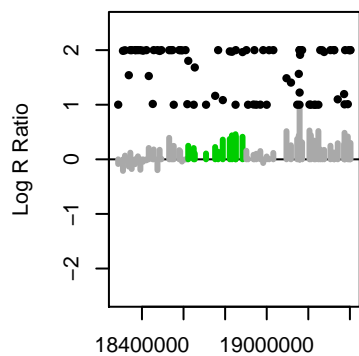

Physical Position NCBI36, Chr 15

4225320397\_B, nprobe = 25

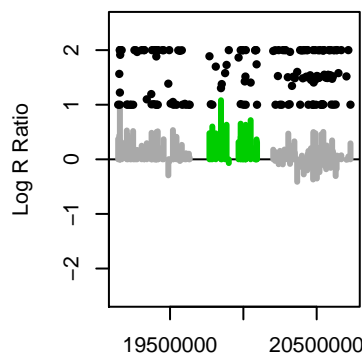

Physical Position NCBI36, Chr 15

4225320397\_B, nprobe = 24

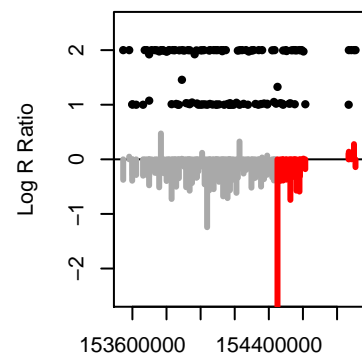

Physical Position NCBI36, Chr X

4225320074\_B, nprobe = 16

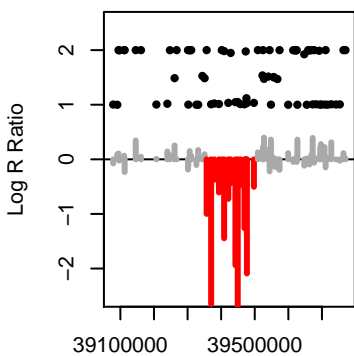

Physical Position NCBI36, Chr 8

4225320074\_B, nprobe = 10

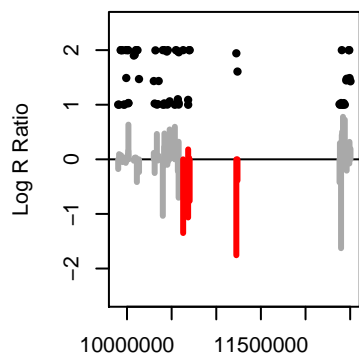

Physical Position NCBI36, Chr Y

4225320074\_B, nprobe = 10

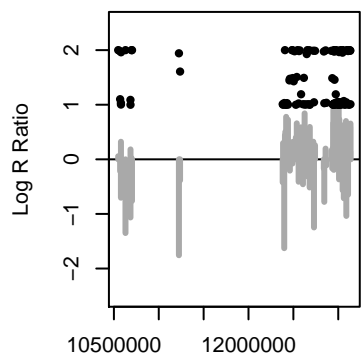

Physical Position NCBI36, Chr Y

4225320074\_B, nprobe = 24

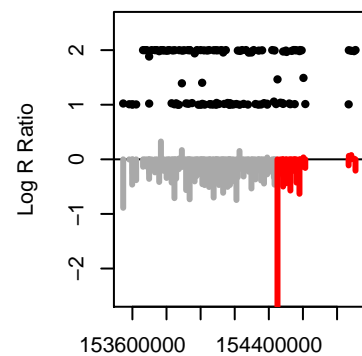

Physical Position NCBI36, Chr X

4225320120\_A, nprobe = 16

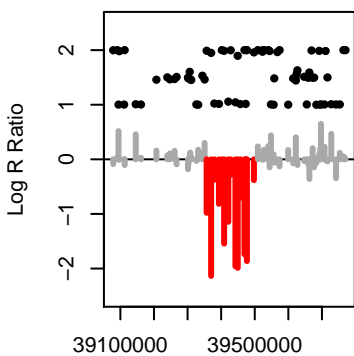

Physical Position NCBI36, Chr 8

4225320120\_A, nprobe = 35

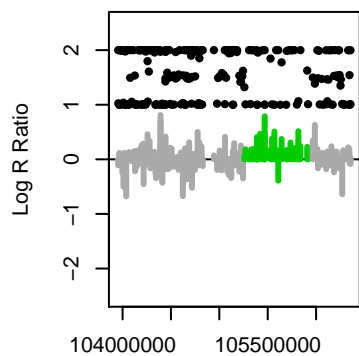

Physical Position NCBI36, Chr 14

4225320120\_A, nprobe = 24

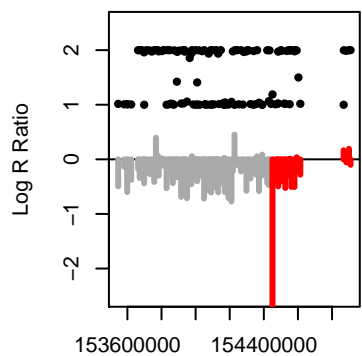

Physical Position NCBI36, Chr X

4225320277\_B, nprobe = 16

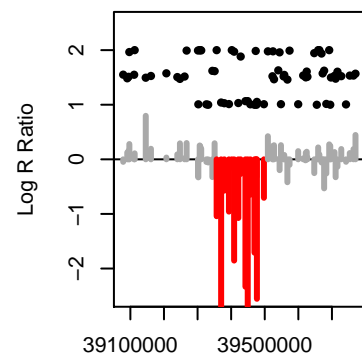

Physical Position NCBI36, Chr 8

4225320277\_B, nprobe = 36

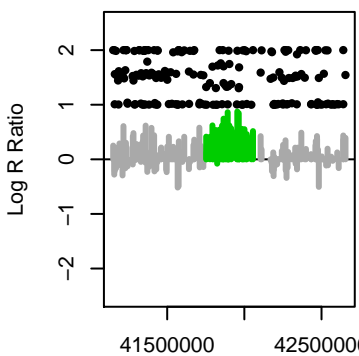

Physical Position NCBI36, Chr 12

4225320277\_B, nprobe = 59

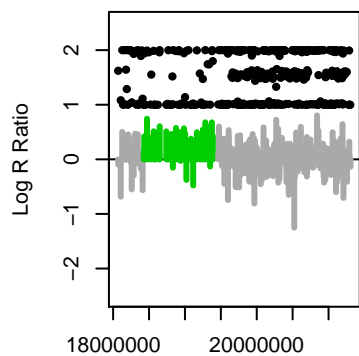

Physical Position NCBI36, Chr 14

4225320277\_B, nprobe = 16

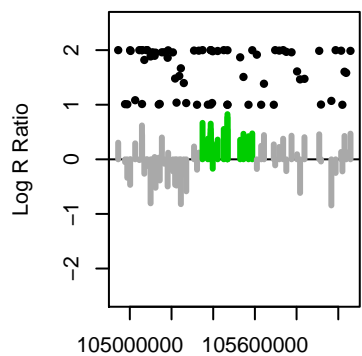

Physical Position NCBI36, Chr 14

4225320277\_B, nprobe = 19

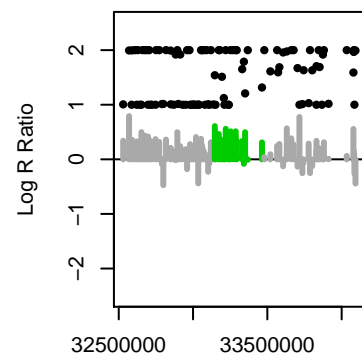

Physical Position NCBI36, Chr 16

4225320277\_B, nprobe = 11

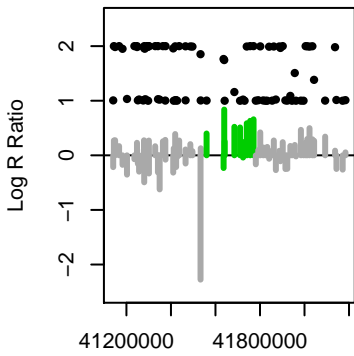

Physical Position NCBI36, Chr 17

4225320277\_B, nprobe = 14

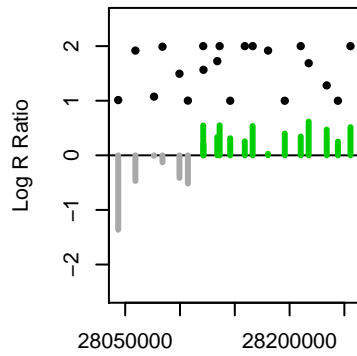

Physical Position NCBI36, Chr 20

4225320287\_A, nprobe = 16

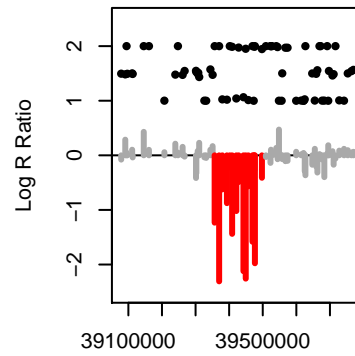

Physical Position NCBI36, Chr 8

4225320287\_A, nprobe = 38

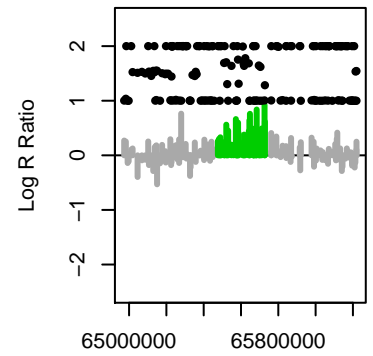

Physical Position NCBI36, Chr 12

4225320287\_A, nprobe = 13

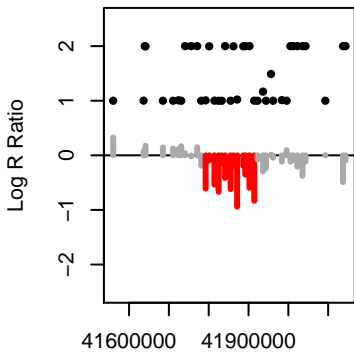

Physical Position NCBI36, Chr 17

4225320287\_A, nprobe = 8

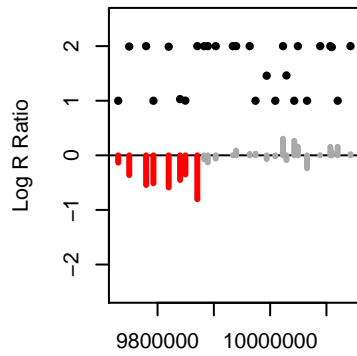

Physical Position NCBI36, Chr 21

4225320288\_B, nprobe = 16

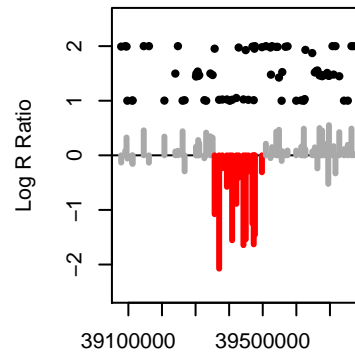

Physical Position NCBI36, Chr 8

4225320288\_B, nprobe = 15

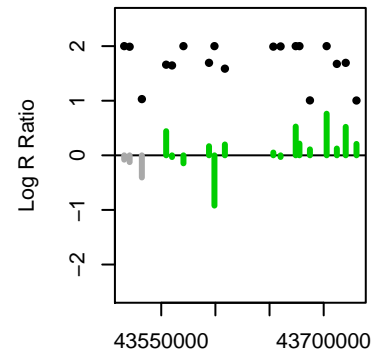

Physical Position NCBI36, Chr 9

4225320288\_B, nprobe = 40

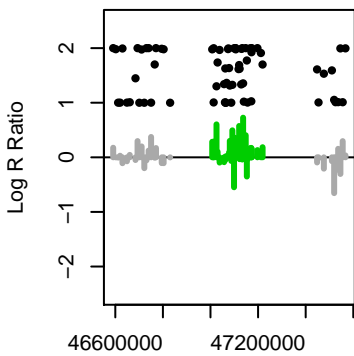

Physical Position NCBI36, Chr 10

4225320288\_B, nprobe = 16

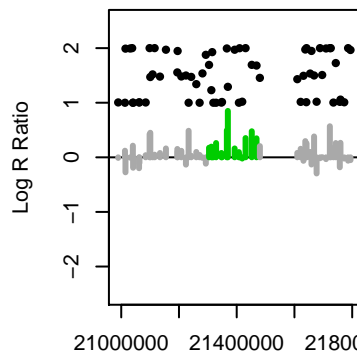

Physical Position NCBI36, Chr 17

4225320288\_B, nprobe = 24

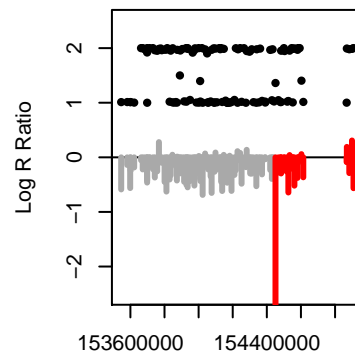

Physical Position NCBI36, Chr X

4225320312\_B, nprobe = 16

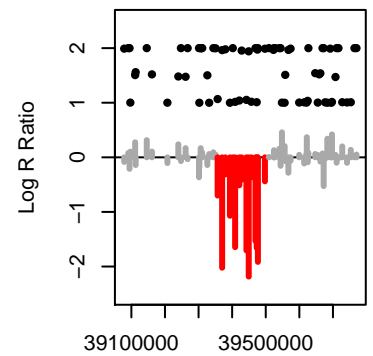

Physical Position NCBI36, Chr 8

4225320312\_B, nprobe = 42

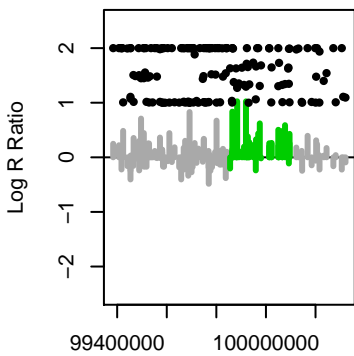

Physical Position NCBI36, Chr 15

4225320312\_B, nprobe = 13

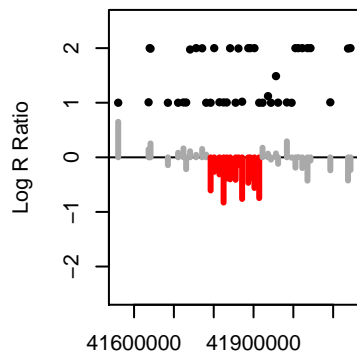

Physical Position NCBI36, Chr 17

4225320312\_B, nprobe = 28

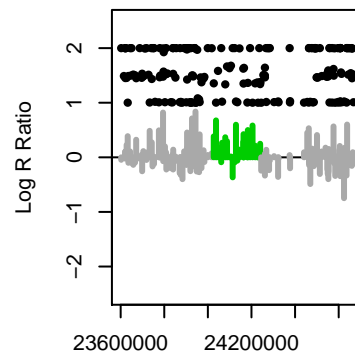

Physical Position NCBI36, Chr 22

4225320346\_B, nprobe = 16

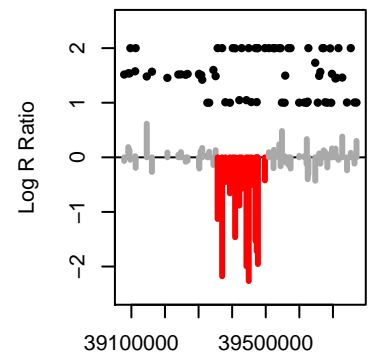

Physical Position NCBI36, Chr 8



4225320346\_B, nprobe = 82

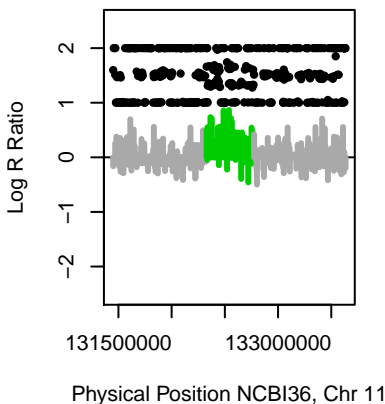

4225320346\_B, nprobe = 10

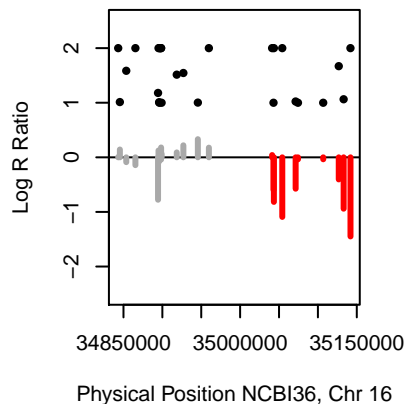

4225320346\_B, nprobe = 34

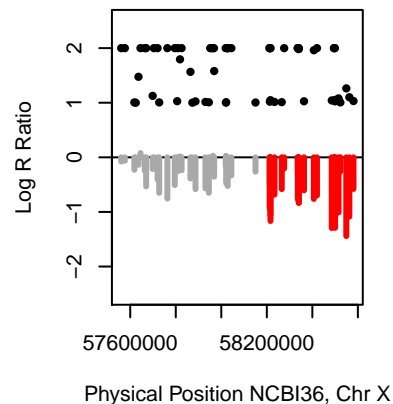

4225320346\_B, nprobe = 24

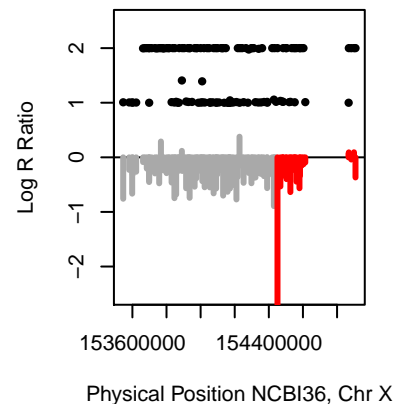

4225320422\_B, nprobe = 16

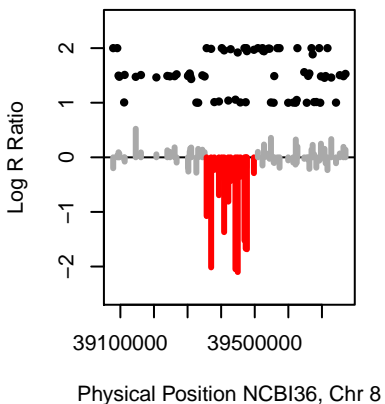

4225320422\_B, nprobe = 447

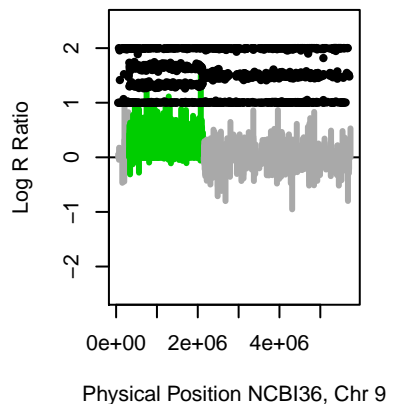

4225320422\_B, nprobe = 9

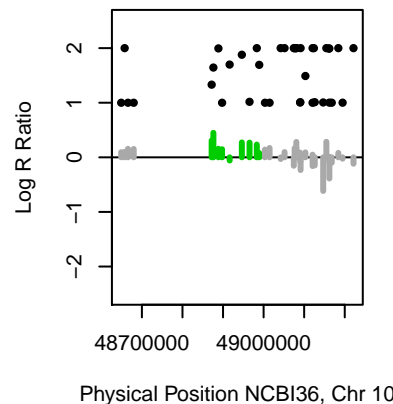

4225320422\_B, nprobe = 8

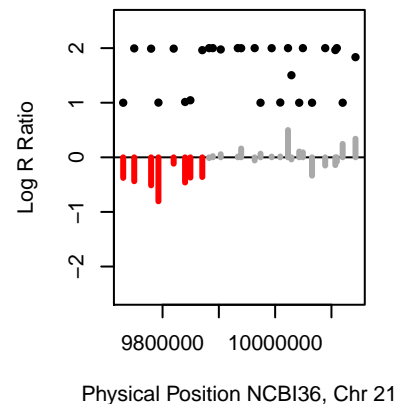

4225320422\_B, nprobe = 10

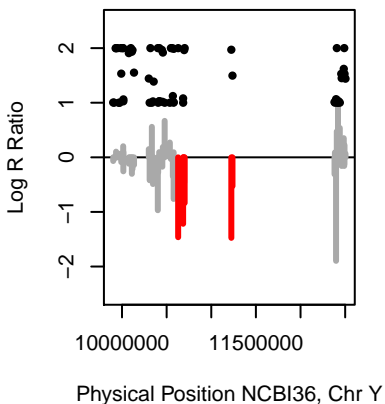

4225320422\_B, nprobe = 10

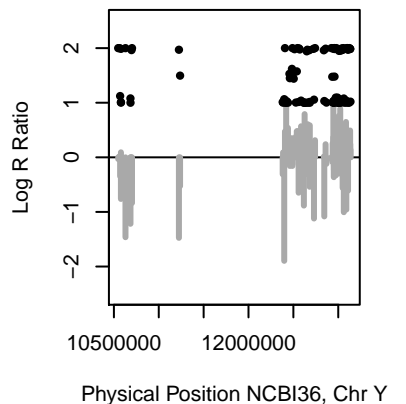

4225320487\_B, nprobe = 16

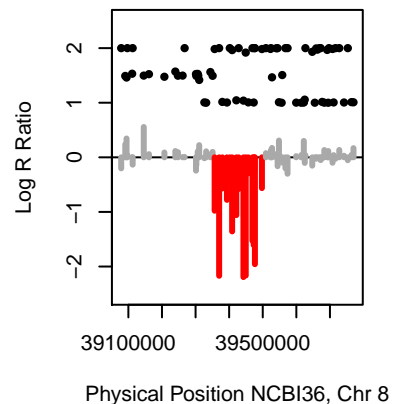

4225320487\_B, nprobe = 25

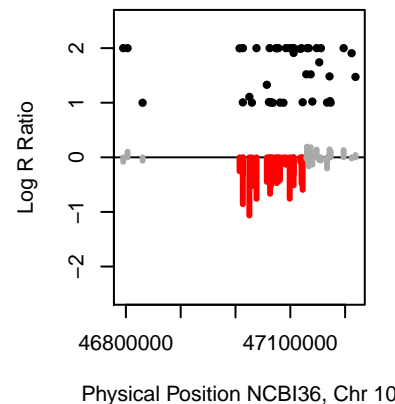

4225320487\_B, nprobe = 18

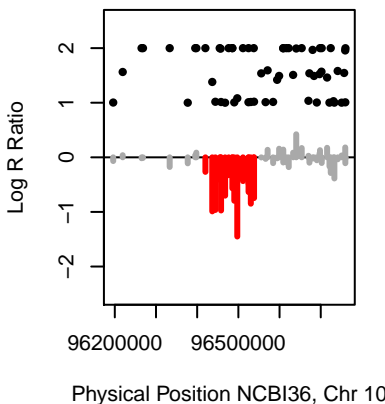

4225320487\_B, nprobe = 33

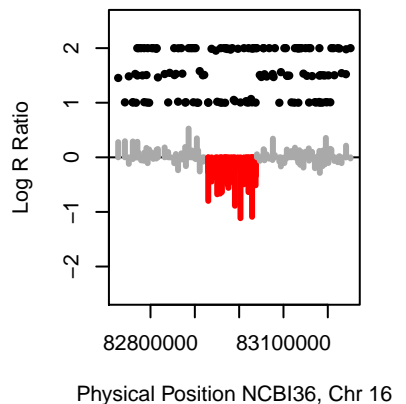

4225320487\_B, nprobe = 15

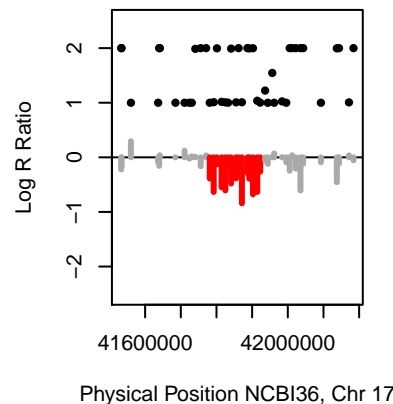

4225320487\_B, nprobe = 10

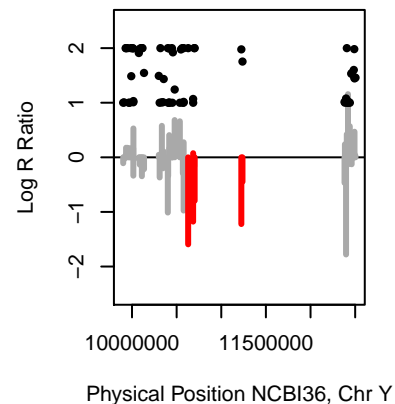

4225320487\_B, nprobe = 10

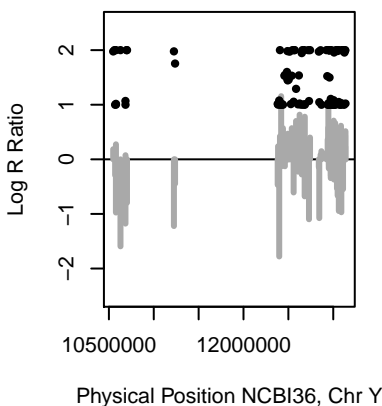

4225320487\_B, nprobe = 24

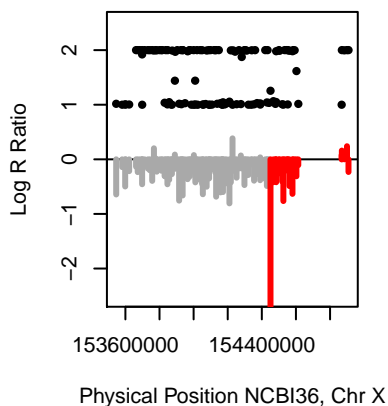

4225320882\_A, nprobe = 31

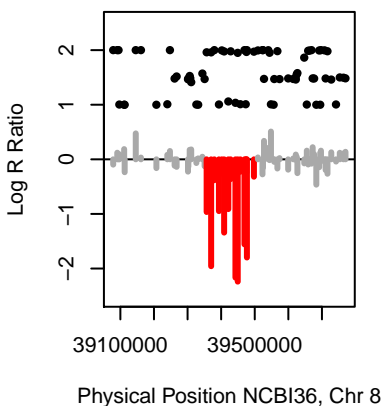

4225320882\_A, nprobe = 11

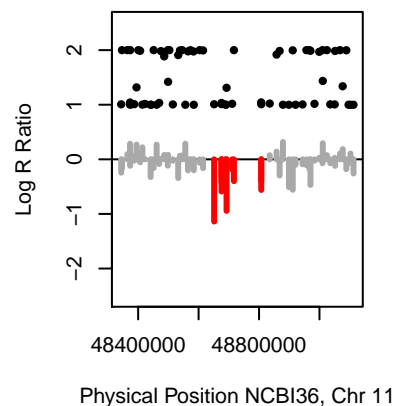

4225320882\_A, nprobe = 28

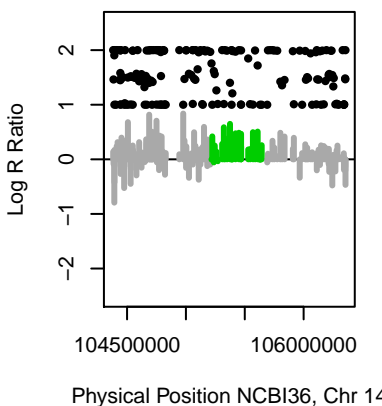

4225320882\_A, nprobe = 8

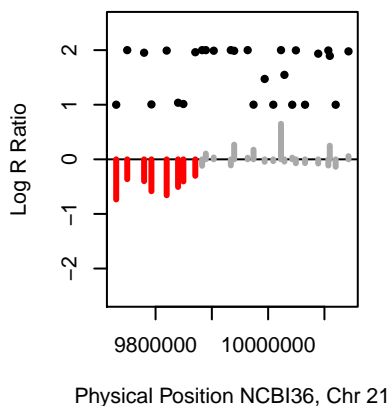

4225320237\_B, nprobe = 25

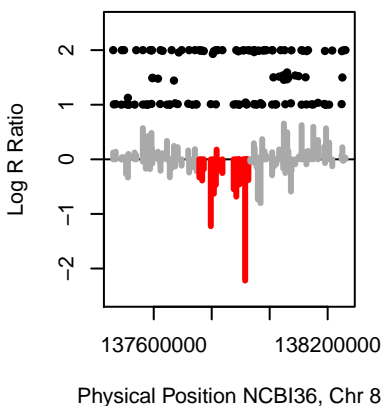

4225320237\_B, nprobe = 89

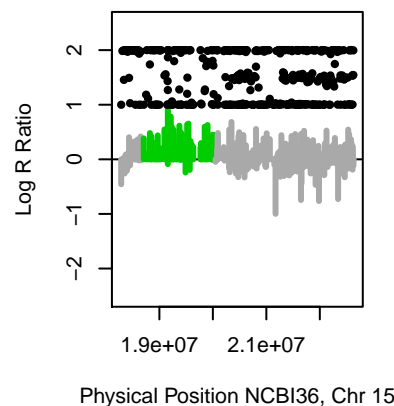

4225320237\_B, nprobe = 13

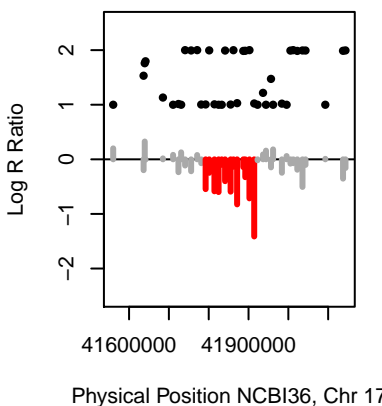

4225320237\_B, nprobe = 8

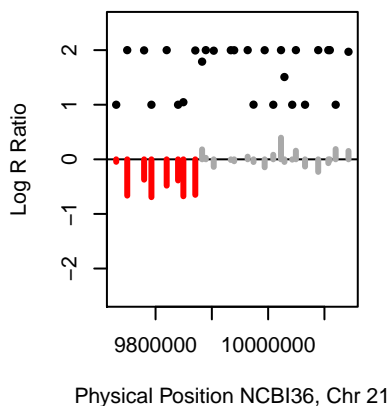

4225320237\_B, nprobe = 14

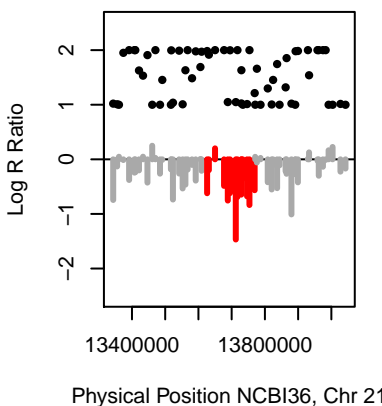

4225320237\_B, nprobe = 24

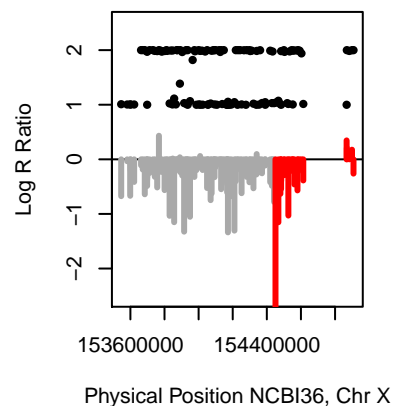

4225320104\_A, nprobe = 34

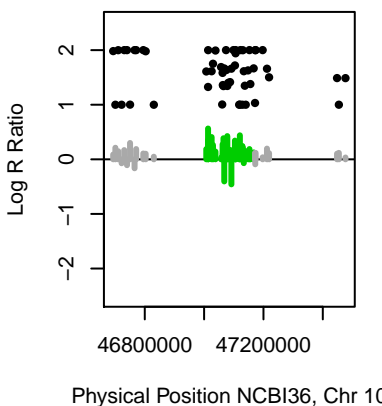

4225320104\_A, nprobe = 17

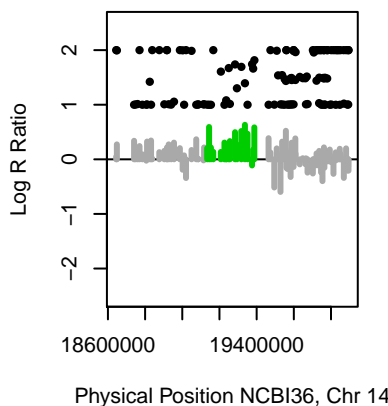

4225320104\_A, nprobe = 9

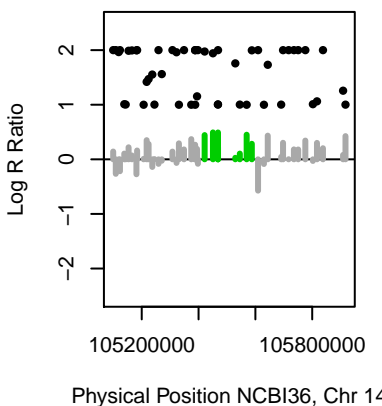

4225320104\_A, nprobe = 31

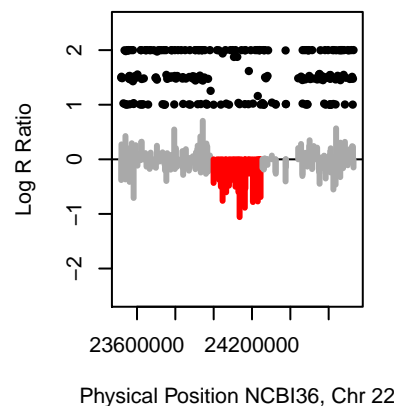

4225320256\_A, nprobe = 12

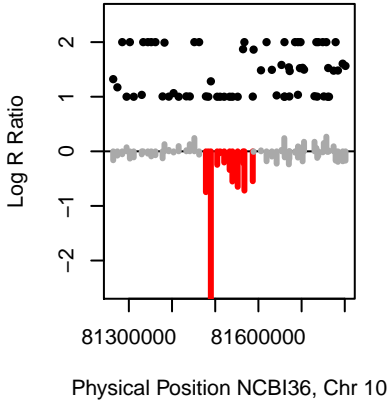

4225320256\_A, nprobe = 32

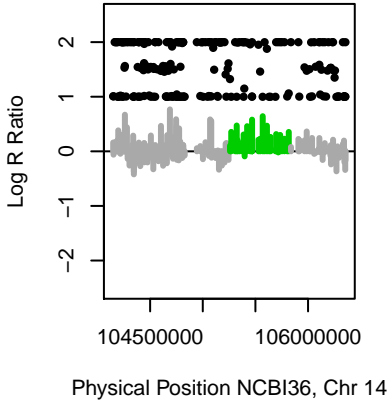

4225320256\_A, nprobe = 13

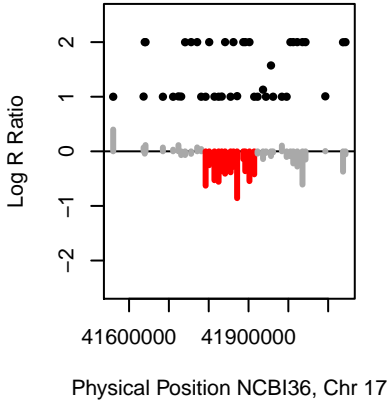

4225320818\_A, nprobe = 11

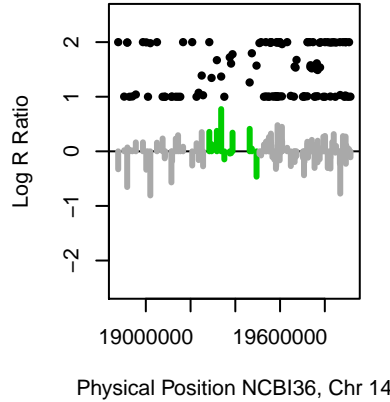

4225320818\_A, nprobe = 15

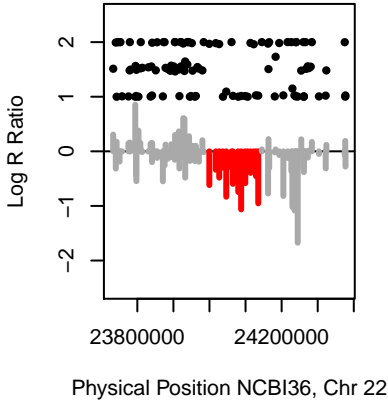

4225320818\_A, nprobe = 14

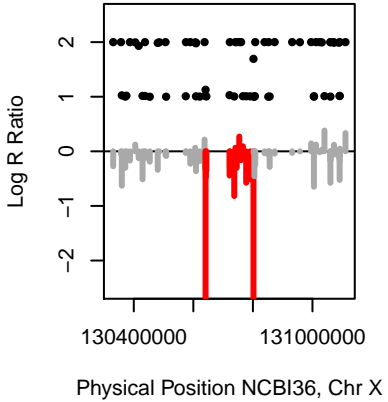

4225320818\_A, nprobe = 24

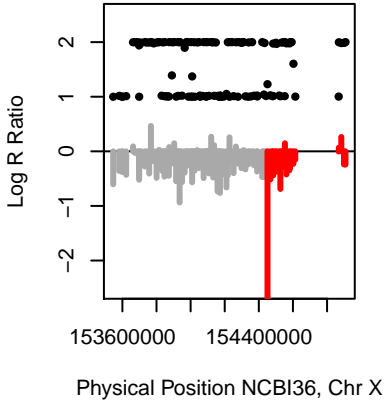

4225320081\_A, nprobe = 23

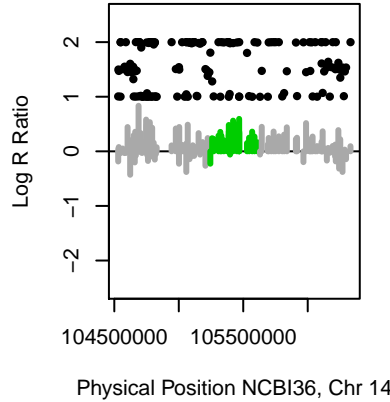

4225320081\_A, nprobe = 24

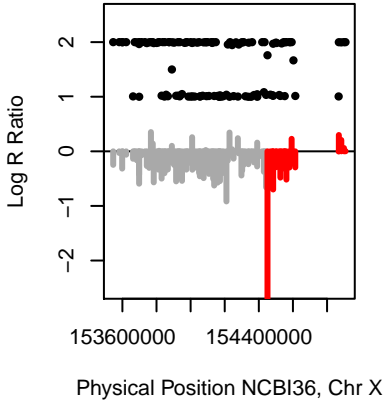

4225320254\_B, nprobe = 22

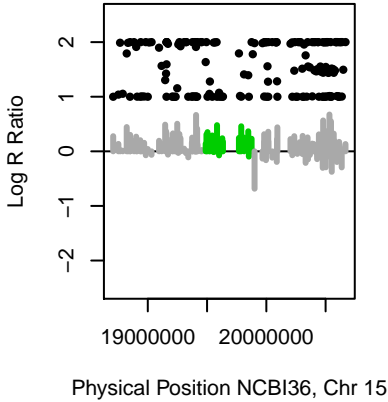

4225320254\_B, nprobe = 38

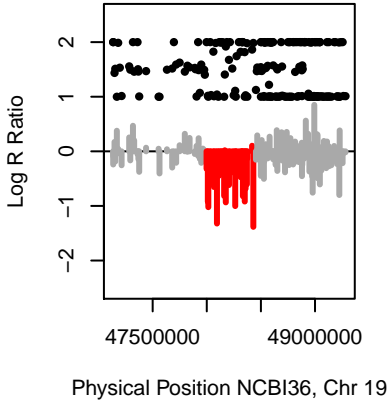

4225320254\_B, nprobe = 8

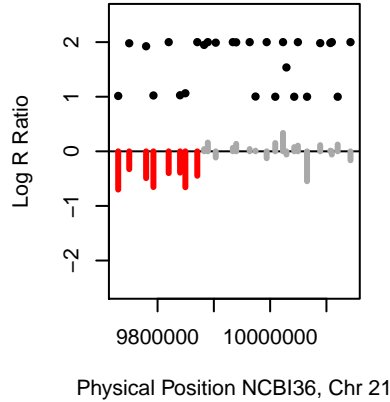

4225320147\_B, nprobe = 24

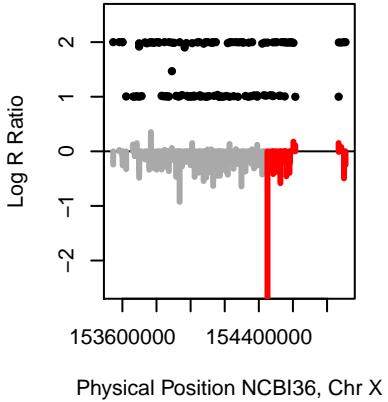

Supplement: S1 (10.1371/journal.pgen.1003349.s001) [file journal.pgen.1003349.s001]
